# Supplementary material for: Angular Leaf Spot Resistance Loci Associated With Different Plant Growth Stages in Common Bean
Source: Front Plant Sci. 2021 Apr 13;12:647043. doi: 10.3389/fpls.2021.647043 (PMC8078856; doi:10.3389/fpls.2021.647043)
Supplement: Supplementary Table 3 — Genetic annotation of each locus mapped for the three evaluations of resistance to angular leaf spot (V2, V3, and R8) through both approaches: GWAS and linkage mapping. First table is composed only of genes with genetic annotations related to disease resistance identified in the confidence interval of each marker. All genes present in the confidence interval of each locus are present in separate tabs. [file Table_3.XLSX]

## Sheet: Summary
Table S3. Genetic annotation of each locus mapped for the three evaluations of resistance to angular leaf spot (V2, V3 and R8) through both approaches: GWAS and linkage mapping. First table is composed only of genes with genetic annotations related to disease resistance identified in the confidence interval of each marker. All genes present in the confidence interval of each locus are present in …
PS	QTN	SNP	Pv	Position	QTN Size	Gene	Dist	Sense	Annotation
V2	QTN1.1	ss715648599	1	13596763	-	-	-	-	-
	QTN4.1	ss715649341	4	43649790	0.5	Phvul.004G134300.1	0.352949	-	disease resistance protein (TIR-NBS-LRR class), putative
						Phvul.004G135100.1	0.220457	-	disease resistance protein (TIR-NBS-LRR class), putative
						Phvul.004G136100.1	0.064531	-	receptor-like kinase 1
	QTN7.1	ss715648576	7	48549690	-	-	-	-	-
	QTN8.1 QNT8.2	ss715647412 ss715648542	8	9296154 12274560	6.6	Phvul.008G071966.1	4.16862	-	LRR and NB-ARC domains-containing disease resistance protein
						Phvul.008G072032.1	4.16205	-	NB-ARC domain-containing disease resistance protein
						Phvul.008G072100.1	4.15371	-	NB-ARC domain-containing disease resistance protein
						Phvul.008G072200.1	4.12223	-	NB-ARC domain-containing disease resistance protein
						Phvul.008G072300.1	4.09534	-	Disease resistance protein (CC-NBS-LRR class) family
						Phvul.008G077500.1	3.27755	-	cysteine-rich RLK (RECEPTOR-like protein kinase) 23
						Phvul.008G077600.1	3.25406	-	cysteine-rich RLK (RECEPTOR-like protein kinase) 25
						Phvul.008G077700.1	3.24236	-	cysteine-rich RLK (RECEPTOR-like protein kinase) 25
						Phvul.008G077750.1	3.23762	-	Leucine-rich repeat transmembrane protein kinase
						Phvul.008G077800.1	3.22794	-	cysteine-rich RLK (RECEPTOR-like protein kinase) 25
						Phvul.008G079800.1	3.0459	-	Leucine-rich repeat protein kinase family protein
						Phvul.008G080000.2	3.02097	-	Leucine-rich repeat protein kinase family protein
						Phvul.008G080101.1	3.01363	-	Leucine-rich repeat protein kinase family protein
						Phvul.008G080500.1	2.97119	-	Leucine-rich repeat protein kinase family protein
						Phvul.008G082500.1	2.7443	-	Leucine-rich receptor-like protein kinase family protein
						Phvul.008G083000.1	2.70016	-	Protein kinase superfamily protein
						Phvul.008G083300.1	2.6625	-	Disease resistance-responsive (dirigent-like protein) family protein
						Phvul.008G083700.3	2.61773	-	Protein kinase superfamily protein
						Phvul.008G091600.1	1.57502	-	Disease resistance-responsive (dirigent-like protein) family protein
						Phvul.008G093000.1	1.38009	-	Leucine-rich repeat protein kinase family protein
						Phvul.008G093200.1	1.36012	-	Leucine-rich repeat protein kinase family protein
						Phvul.008G097500.1	0.707065	-	Leucine-rich repeat protein kinase family protein
						Phvul.008G120600.1	0.279738	-	Protein kinase superfamily protein
						Phvul.008G105300.1	0.809449	+	Protein kinase superfamily protein
						Phvul.008G106500.1	0.968825	+	Leucine-rich repeat receptor-like protein kinase family protein
						Phvul.008G106600.1	0.98147	+	Leucine-rich repeat receptor-like protein kinase family protein
V3	QTN1.2	ss715644121	1	20172472	4.7	Phvul.001G093900.2	3.70849	-	disease resistance protein (TIR-NBS-LRR class), putative
						Phvul.001G096600.1	1.78883	-	Protein kinase superfamily protein
						Phvul.001G102100.1	0.713477	+	Protein kinase superfamily protein
	QTN1.3	ss715645868	1	49487812	0.01	Phvul.001G245300.1	0.240926	+	Leucine-rich repeat protein kinase family protein
	QTN1.4	ss715650359	1	52176970	-	-	-	-	-
	QTN2.2	ss715646000	2	48072185	1.47	Phvul.002G297700.1	1.44779	-	Leucine-rich repeat (LRR) family protein
						Phvul.002G302300.1	1.01409	-	Protein kinase superfamily protein
						Phvul.002G302600.1	0.992081	-	Leucine-rich repeat protein kinase family protein
						Phvul.002G302704.1	0.979655	-	protein kinase family protein
						Phvul.002G307200.1	0.553679	-	Leucine-rich repeat (LRR) family protein
						Phvul.002G310000.2	0.349603	-	Leucine-rich repeat (LRR) family protein
						Phvul.002G314200.1	0.017464	+	Leucine-rich repeat (LRR) family protein
	QTN3.2	ss715645578	3	50018570	0.2	Phvul.003G260300.1	0.037246	-	Leucine-rich receptor-like protein kinase family protein
	QTN8.3	ss715647398	8	59270646	0.13	Phvul.008G244400.1	0.010159	+	Leucine-rich repeat protein kinase family protein
						Phvul.008G244500.1	0.030263	+	NB-ARC domain-containing disease resistance protein
						Phvul.008G244600.1	0.036876	+	Leucine-rich repeat protein kinase family protein
						Phvul.008G244800.1	0.063514	+	Leucine-rich repeat protein kinase family protein
						Phvul.008G244900.1	0.078423	+	NB-ARC domain-containing disease resistance protein
						Phvul.008G245000.1	0.084032	+	Leucine-rich repeat protein kinase family protein
						Phvul.008G245100.1	0.10538	+	NB-ARC domain-containing disease resistance protein
						Phvul.008G245200.1	0.127916	+	NB-ARC domain-containing disease resistance protein
						Phvul.008G245300.1	0.135834	+	Leucine-rich repeat protein kinase family protein
						Phvul.008G245400.1	0.152096	+	Disease resistance protein (CC-NBS-LRR class) family
						Phvul.008G245600.1	0.169755	+	Leucine-rich repeat protein kinase family protein
	QTN10.1	ss715646348	10	40164727	0.3	Phvul.010G120500.1	0.059246	-	Protein kinase superfamily protein
R8	QTN2.1	ss715645817	2	24571804	5.3	Phvul.002G112100.1	0.521911	-	Leucine-rich repeat (LRR) family protein
						Phvul.002G115700.1	0.198704	+	Disease resistance-responsive (dirigent-like protein) family protein
						Phvul.002G115800.1	0.203317	+	Protein kinase superfamily protein
						Phvul.002G115900.1	0.213313	+	Protein kinase superfamily protein
						Phvul.002G116200.1	0.265576	+	Protein kinase superfamily protein
						Phvul.002G117100.2	0.449525	+	Protein kinase superfamily protein
						Phvul.002G123200.1	1.60625	+	Leucine-rich repeat protein kinase family protein
						Phvul.002G123500.1	1.64427	+	Leucine-rich repeat protein kinase family protein
						Phvul.002G124200.1	1.73322	+	Leucine-rich repeat protein kinase family protein
						Phvul.002G124700.1	1.79108	+	Protein kinase superfamily protein
						Phvul.002G125100.1	1.82573	+	Leucine-rich repeat protein kinase family protein
						Phvul.002G126600.1	2.24832	+	Leucine-rich repeat protein kinase family protein
						Phvul.002G127800.1	2.44436	+	Leucine-rich repeat protein kinase family protein
						Phvul.002G129200.1	2.59726	+	NB-ARC domain-containing disease resistance protein
						Phvul.002G129500.1	2.66326	+	NB-ARC domain-containing disease resistance protein
						Phvul.002G129566.1	2.68562	+	LRR and NB-ARC domains-containing disease resistance protein
						Phvul.002G129632.1	2.68724	+	NB-ARC domain-containing disease resistance protein
						Phvul.002G129700.1	2.69701	+	LRR and NB-ARC domains-containing disease resistance protein
						Phvul.002G129800.1	2.71911	+	NB-ARC domain-containing disease resistance protein
						Phvul.002G129900.1	2.72393	+	NB-ARC domain-containing disease resistance protein
						Phvul.002G130000.1	2.73482	+	NB-ARC domain-containing disease resistance protein
						Phvul.002G130100.1	2.74636	+	NB-ARC domain-containing disease resistance protein
						Phvul.002G130300.1	2.76622	+	NB-ARC domain-containing disease resistance protein
						Phvul.002G130400.1	2.79578	+	NB-ARC domain-containing disease resistance protein
						Phvul.002G130500.1	2.8263	+	NB-ARC domain-containing disease resistance protein
						Phvul.002G130600.1	2.84646	+	NB-ARC domain-containing disease resistance protein
						Phvul.002G130666.1	2.87396	+	LRR and NB-ARC domains-containing disease resistance protein
						Phvul.002G130732.1	2.87587	+	NB-ARC domain-containing disease resistance protein
						Phvul.002G131000.1	2.91797	+	LRR and NB-ARC domains-containing disease resistance protein
						Phvul.002G131100.1	2.92675	+	LRR and NB-ARC domains-containing disease resistance protein
						Phvul.002G131200.1	2.95725	+	LRR and NB-ARC domains-containing disease resistance protein
						Phvul.002G131400.1	2.96766	+	Protein kinase superfamily protein
						Phvul.002G133400.1	3.16623	+	NB-ARC domain-containing disease resistance protein
						Phvul.002G133600.1	3.17665	+	NB-ARC domain-containing disease resistance protein
						Phvul.002G135100.1	3.3904	+	NB-ARC domain-containing disease resistance protein
						Phvul.002G135650.1	3.46364	+	NB-ARC domain-containing disease resistance protein
	QTN3.1	ss715645580	3	50004446	0.2	Phvul.003G260300.1	0.023122	-	Leucine-rich receptor-like protein kinase family protein
PS: Phenological stage used for mapping
QTN: QTN name for each significant SNP.
Pv: Chromosome
QTN Size: size of the haplotype block in which the SNP is present
Dist: Distance from SNP to selected gene
Sense: Sense of the gene: upstream (-) or downstream(+).

## Sheet: ALS1.1
Chrm	Start	End	transcriptName	Sense	Pfam	arabi-symbol	arabi-defline
Chr01	21931279	21937295	Phvul.001G105101.1	-	PF01554		MATE efflux family protein
Chr01	22197686	22198839	Phvul.001G106900.1	-
Chr01	22283298	22290593	Phvul.001G107000.3	+	PF01491	ATFH,FH	frataxin homolog
Chr01	22347135	22350855	Phvul.001G107100.1	+	PF00641	VAR3	zinc finger (Ran-binding) family protein
Chr01	22397507	22399822	Phvul.001G107200.1	+	PF00561		alpha/beta-Hydrolases superfamily protein
Chr01	22456452	22464242	Phvul.001G107300.1	+	PF00175,PF00970	ATCBR,CBR,CBR1	NADH:cytochrome B5 reductase 1
Chr01	22501753	22504846	Phvul.001G107400.1	+	PF03016		exostosin family protein
Chr01	22505317	22510009	Phvul.001G107500.1	+	PF00291	CS26	cysteine synthase 26
Chr01	22536973	22538834	Phvul.001G107600.1	-	PF00249	AtMYB60,MYB60	myb domain protein 60
Chr01	22596807	22599686	Phvul.001G107700.1	-			F-box family protein
Chr01	22623833	22625584	Phvul.001G107800.1	-	PF01080	PS1	Presenilin-1
Chr01	22625925	22631426	Phvul.001G107900.1	-	PF00657		GDSL-like Lipase/Acylhydrolase superfamily protein
Chr01	22644872	22650644	Phvul.001G108000.2	+	PF01025	EMB1241	Co-chaperone GrpE family protein
Chr01	23191559	23195119	Phvul.001G108101.1	-	PF01554		MATE efflux family protein
Chr01	23373308	23377304	Phvul.001G108200.2	-	PF01554		MATE efflux family protein
Chr01	23513381	23513877	Phvul.001G108100.1	+	PF00298		Ribosomal protein L11 family protein
Chr01	24026689	24034147	Phvul.001G091600.1	-	PF00682,PF08502	IMS1,IPMS2,MAML-3	2-isopropylmalate synthase 1
Chr01	24052182	24052756	Phvul.001G091700.1	+
Chr01	24140606	24141185	Phvul.001G091800.1	+
Chr01	25168043	25180792	Phvul.001G094701.1	-	PF01529		DHHC-type zinc finger family protein
Chr01	25196440	25197003	Phvul.001G097601.1	+		ATDGK3,DGK3	diacylglycerol kinase 3
Chr01	25259271	25260783	Phvul.001G100501.1	-
Chr01	25260575	25263547	Phvul.001G103400.1	-	PF00856,PF05033,PF02182	SDG19,SUVH3	SU(VAR)3-9 homolog 3
Chr01	25471771	25472131	Phvul.001G105102.1	-
Chr01	25497324	25499880	Phvul.001G106800.1	+	PF00249	AtMYB56,MYB56	myb domain protein 56
Chr01	25567126	25569535	Phvul.001G106700.1	-	PF00046	WOX11	WUSCHEL related homeobox 11
Chr01	25623943	25625989	Phvul.001G106600.1	-	PF00141		Peroxidase superfamily protein
Chr01	25640137	25643019	Phvul.001G106933.1	-
Chr01	25680313	25682458	Phvul.001G106500.1	-	PF00141		Peroxidase superfamily protein
Chr01	25706905	25709629	Phvul.001G106400.1	-	PF02701	CDF3	cycling DOF factor 3
Chr01	25891006	25892483	Phvul.001G106300.1	-
Chr01	25965277	25966376	Phvul.001G106200.1	+
Chr01	26033782	26041464	Phvul.001G106000.5	-	PF07741		Cyclin/Brf1-like TBP-binding protein
Chr01	26035272	26037752	Phvul.001G106100.1	+
Chr01	26046439	26069325	Phvul.001G106433.1	-	PF07741,PF00382		Cyclin/Brf1-like TBP-binding protein
Chr01	26074621	26077806	Phvul.001G105800.1	-	PF02485	UNE7	Core-2/I-branching beta-1,6-N-acetylglucosaminyltransferase family protein
Chr01	26153690	26156160	Phvul.001G105700.1	+	PF04515		Plasma-membrane choline transporter family protein
Chr01	26156692	26160858	Phvul.001G105600.1	-			DnaJ/Hsp40 cysteine-rich domain superfamily protein
Chr01	26231064	26232936	Phvul.001G105500.1	+	PF01699		Sodium/calcium exchanger family protein
Chr01	26290092	26292316	Phvul.001G105400.1	-	PF01699	CAX7	calcium exchanger 7
Chr01	26326716	26332355	Phvul.001G105300.1	-	PF03735		Emsy N Terminus (ENT) domain-containing protein
Chr01	26348242	26409889	Phvul.001G105633.1	+	PF00013,PF03726,PF00575,PF03725,PF01138	PNP,RIF10	polyribonucleotide nucleotidyltransferase, putative
Chr01	26452588	26457677	Phvul.001G105000.1	+	PF08646		Nucleic acid-binding, OB-fold-like protein
Chr01	26459135	26459853	Phvul.001G104900.1	+
Chr01	26474154	26476597	Phvul.001G104800.1	+	PF00327		Ribosomal protein L30/L7 family protein
Chr01	26480808	26488283	Phvul.001G104700.1	-	PF13906,PF13520	CAT2	cationic amino acid transporter 2
Chr01	26496239	26512274	Phvul.001G104600.1	-	PF13906,PF13520	CAT2	cationic amino acid transporter 2
Chr01	26567140	26572090	Phvul.001G104500.1	-	PF00651	ATBPM4,BPM4	BTB-POZ and MATH domain 4
Chr01	26579261	26581966	Phvul.001G104400.1	-	PF00651	ATBPM4,BPM4	BTB-POZ and MATH domain 4
Chr01	26649006	26652517	Phvul.001G103600.1	-	PF01554		MATE efflux family protein
Chr01	26726641	26727256	Phvul.001G103700.1	+
Chr01	26741216	26756445	Phvul.001G104033.1	-	PF00682	IMS1,IPMS2,MAML-3	2-isopropylmalate synthase 1
Chr01	26750286	26750783	Phvul.001G103900.1	+	PF03946,PF00298		Ribosomal protein L11 family protein
Chr01	26755752	26756520	Phvul.001G104000.1	+
Chr01	27046847	27047394	Phvul.001G104100.1	+
Chr01	27317892	27319390	Phvul.001G104200.1	+	PF00651	ATBPM4,BPM4	BTB-POZ and MATH domain 4
Chr01	27359628	27360999	Phvul.001G104300.1	+	PF00651	ATBPM4,BPM4	BTB-POZ and MATH domain 4
Chr01	27490345	27497953	Phvul.001G103500.1	+	PF00682	IMS1,IPMS2,MAML-3	2-isopropylmalate synthase 1
Chr01	27532028	27534955	Phvul.001G103833.1	+	PF08502	IPMS1,MAML-4	methylthioalkylmalate synthase-like 4
Chr01	28128757	28134707	Phvul.001G108600.1	+	PF01529		DHHC-type zinc finger family protein
Chr01	28135966	28139094	Phvul.001G108700.1	+	PF02915	ACSF,CHL27,CRD1	dicarboxylate diiron protein, putative (Crd1)
Chr01	28183705	28186277	Phvul.001G108800.1	-	PF00230	SIP2,SIP2;1	small and basic intrinsic protein 2;1
Chr01	28274313	28281420	Phvul.001G108900.1	+	PF04193		PQ-loop repeat family protein / transmembrane family protein
Chr01	28285477	28288038	Phvul.001G109000.1	-	PF03745
Chr01	28392182	28393631	Phvul.001G109100.1	+		PKS4	phytochrome kinase substrate 4
Chr01	28495364	28498066	Phvul.001G109200.1	+	PF00085	ACHT4	atypical CYS HIS rich thioredoxin 4
Chr01	28580747	28593465	Phvul.001G109300.1	+	PF04153,PF04065		transcription regulator NOT2/NOT3/NOT5 family protein
Chr01	28646658	28650361	Phvul.001G109400.1	+	PF07983,PF00332		O-Glycosyl hydrolases family 17 protein
Chr01	28671292	28672700	Phvul.001G109500.1	-	PF00320	GATA9	GATA transcription factor 9
Chr01	28679407	28686033	Phvul.001G109600.1	-	PF01844		HNH endonuclease
Chr01	28729955	28731060	Phvul.001G109700.1	-	PF08659		NAD(P)-binding Rossmann-fold superfamily protein
Chr01	28792204	28794677	Phvul.001G109800.1	-	PF02721		Nucleic acid-binding, OB-fold-like protein
Chr01	28802986	28807631	Phvul.001G109900.1	+	PF12998	ING2	PHD finger protein-related
Chr01	28839832	28843068	Phvul.001G110000.1	+			ARM repeat superfamily protein
Chr01	28847738	28849618	Phvul.001G110100.1	-		NDF2,NDH45	NDH-dependent cyclic electron flow 1
Chr01	28850742	28855032	Phvul.001G110200.1	-	PF04146	ECT2	evolutionarily conserved C-terminal region 2
Chr01	28916105	28923262	Phvul.001G110300.1	+	PF00069		Protein kinase family protein
Chr01	28946280	28948325	Phvul.001G110400.1	+	PF04410		H/ACA ribonucleoprotein complex, subunit Gar1/Naf1 protein
Chr01	28955523	28961647	Phvul.001G110500.1	-	PF02812,PF00208	GDH1	glutamate dehydrogenase 1
Chr01	28982387	28984754	Phvul.001G110601.1	-
Chr01	28992477	28993422	Phvul.001G110700.1	+			Methyltransferase-related protein
Chr01	28993428	29000132	Phvul.001G110800.1	-	PF00226		Chaperone DnaJ-domain superfamily protein
Chr01	28997709	28998030	Phvul.001G110900.1	+
Chr01	29309228	29316328	Phvul.001G114500.1	+	PF00485,PF14681	ATUK/UPRT1,UK/UPRT1,UKL1	uridine kinase/uracil phosphoribosyltransferase 1
Chr01	29317668	29318686	Phvul.001G114600.1	-
Chr01	29333270	29338217	Phvul.001G114700.2	+	PF05916	PSF2	PSF2
Chr01	29340921	29343290	Phvul.001G114800.1	+	PF07847		Protein of unknown function (DUF1637)
Chr01	29355567	29363560	Phvul.001G114900.1	+	PF01042,PF01902		endoribonucleases
Chr01	29357522	29358012	Phvul.001G115000.1	-		ATNHX2,NHX2	sodium hydrogen exchanger 2
Chr01	29389328	29395712	Phvul.001G115100.1	+	PF13855,PF07714		Leucine-rich repeat protein kinase family protein
Chr01	29436430	29439643	Phvul.001G115200.1	+	PF03195	LBD20	LOB domain-containing protein 20
Chr01	29471369	29477163	Phvul.001G115300.1	-	PF00551		Formyl transferase
Chr01	29478818	29486536	Phvul.001G115400.1	-	PF02163	EGY1	Peptidase M50 family protein
Chr01	29538756	29543768	Phvul.001G115500.1	+	PF10225		Uncharacterized conserved protein (DUF2215)
Chr01	29545175	29547969	Phvul.001G115600.1	+	PF01386,PF14693		Ribosomal protein L25/Gln-tRNA synthetase, anti-codon-binding domain
Chr01	29625623	29634331	Phvul.001G115700.1	+	PF06964	ARAF,ARAF1,ASD1,ATASD1	alpha-L-arabinofuranosidase 1
Chr01	29673930	29677554	Phvul.001G116100.1	+	PF06964	ARAF,ARAF1,ASD1,ATASD1	alpha-L-arabinofuranosidase 1
Chr01	29703370	29704262	Phvul.001G116150.1	-		ASD2,ATASD2	alpha-L-arabinofuranosidase 2
Chr01	29751255	29756163	Phvul.001G116200.1	+	PF06964	ARAF,ARAF1,ASD1,ATASD1	alpha-L-arabinofuranosidase 1
Chr01	29757628	29762912	Phvul.001G116300.1	+	PF06964	ARAF,ARAF1,ASD1,ATASD1	alpha-L-arabinofuranosidase 1
Chr01	29767067	29771557	Phvul.001G116400.1	+	PF13639		Zinc finger, C3HC4 type (RING finger) family protein
Chr01	29772025	29772924	Phvul.001G116500.1	-
Chr01	29774179	29780681	Phvul.001G116600.1	-			Transducin/WD40 repeat-like superfamily protein
Chr01	29780784	29782731	Phvul.001G116700.1	+	PF11955		Ubiquitin carboxyl-terminal hydrolase family protein
Chr01	29790700	29795331	Phvul.001G116800.1	+	PF04117		Peroxisomal membrane 22 kDa (Mpv17/PMP22) family protein
Chr01	29827948	29830030	Phvul.001G116900.1	-	PF05678	ATCAMBP25,CAMBP25	calmodulin (CAM)-binding protein of 25 kDa
Chr01	29878831	29881502	Phvul.001G117000.1	-	PF01849		Nascent polypeptide-associated complex (NAC), alpha subunit family protein
Chr01	29922687	29925897	Phvul.001G117100.1	-	PF01849		Nascent polypeptide-associated complex (NAC), alpha subunit family protein
Chr01	29926897	29936663	Phvul.001G117200.1	-	PF14641,PF14632,PF14639,PF14635,PF14878,PF14633	GTB1	global transcription factor group B1
Chr01	29963098	29963584	Phvul.001G117300.1	-	PF11744		Aluminium activated malate transporter family protein
Chr01	29974239	29979337	Phvul.001G117400.1	+			hydroxyproline-rich glycoprotein family protein
Chr01	29987004	29989829	Phvul.001G117500.1	+	PF02446,PF00686	DPE2	disproportionating enzyme 2
Chr01	29999412	30000391	Phvul.001G117600.1	+	PF16639		photosynthetic electron transfer A
Chr01	30000436	30007429	Phvul.001G117700.1	+	PF02446	DPE2	disproportionating enzyme 2
Chr01	30045422	30048391	Phvul.001G117800.1	+	PF00454	ATPI4K GAMMA 1,PI4K GAMMA 1	phosphoinositide 4-kinase gamma 1
Chr01	30132860	30137157	Phvul.001G117900.1	-	PF00067	CYP98A3	cytochrome P450, family 98, subfamily A, polypeptide 3
Chr01	30185024	30186164	Phvul.001G118100.1	+			Plant transposase (Ptta/En/Spm family)
Chr01	30198222	30203679	Phvul.001G118200.2	-	PF13414,PF00254	ATFKBP65,FKBP65,ROF2	FKBP-type peptidyl-prolyl cis-trans isomerase family protein
Chr01	30222424	30224907	Phvul.001G118300.2	-	PF00892		nodulin MtN21 /EamA-like transporter family protein
Chr01	30322954	30323500	Phvul.001G118400.1	-
Chr01	30444511	30446247	Phvul.001G118500.1	-	PF00076,PF14111
Chr01	30493307	30495089	Phvul.001G118600.1	+	PF00067	CYP94D2	cytochrome P450, family 94, subfamily D, polypeptide 2
Chr01	30518284	30538377	Phvul.001G118800.2	-	PF14533,PF13423,PF06337	ATUBP5,PDE323,UBP5	ubiquitin-specific protease 5
Chr01	30550669	30555350	Phvul.001G118900.1	-	PF00854		Major facilitator superfamily protein
Chr01	30602387	30611838	Phvul.001G119000.1	-	PF07690		Major facilitator superfamily protein
Chr01	30684821	30688114	Phvul.001G119100.1	+	PF01789		Mog1/PsbP/DUF1795-like photosystem II reaction center PsbP family protein
Chr01	30716628	30720224	Phvul.001G119200.1	+
Chr01	30727200	30730675	Phvul.001G119300.1	-	PF00170	BZIP49	basic region/leucine zipper motif protein 49
Chr01	30747630	30750894	Phvul.001G119400.1	+	PF01424,PF12752		Single-stranded nucleic acid binding R3H protein
Chr01	30757441	30758377	Phvul.001G119500.1	-	PF00249		Homeodomain-like superfamily protein
Chr01	30760652	30770406	Phvul.001G119600.1	-	PF05496,PF00004	CIP111	Cam interacting protein 111
Chr01	30771969	30774768	Phvul.001G119700.1	-	PF02984,PF00134	CYC1BAT,CYCB1;2	Cyclin family protein
Chr01	30792358	30795220	Phvul.001G119800.1	-	PF02984,PF00134	CYC1BAT,CYCB1;2	Cyclin family protein
Chr01	30842474	30853319	Phvul.001G119900.1	-	PF16711,PF16712,PF16709
Chr01	30897940	30900243	Phvul.001G120000.1	-	PF12776
Chr01	30902461	30902678	Phvul.001G120100.1	+
Chr01	30953943	30957950	Phvul.001G120200.1	-	PF08711		Transcription elongation factor (TFIIS) family protein
Chr01	31041875	31046003	Phvul.001G120300.1	-	PF13920,PF08797,PF00271,PF00176		DNA/RNA helicase protein
Chr01	31076327	31100590	Phvul.001G114400.1	-	PF00570,PF08066,PF01612		Polynucleotidyl transferase, ribonuclease H fold protein with HRDC domain
Chr01	31161597	31164911	Phvul.001G114300.1	-	PF00400		Transducin/WD40 repeat-like superfamily protein
Chr01	31229923	31234631	Phvul.001G114200.1	+	PF04842		Plant protein of unknown function (DUF639)
Chr01	31246025	31247153	Phvul.001G114100.2	+
Chr01	31275210	31275444	Phvul.001G114000.1	+
Chr01	31281443	31283012	Phvul.001G113900.1	+	PF00635,PF12796,PF13637		Ankyrin repeat family protein
Chr01	31409133	31414219	Phvul.001G113800.1	+	PF08267,PF01717	ATCIMS,ATMETS,ATMS1	Cobalamin-independent synthase family protein
Chr01	31415990	31422260	Phvul.001G113700.1	-	PF02854,PF02847		MIF4G domain-containing protein / MA3 domain-containing protein
Chr01	31446421	31447145	Phvul.001G113600.1	+	PF02298		Cupredoxin superfamily protein
Chr01	31451190	31452831	Phvul.001G113500.1	-	PF00011		HSP20-like chaperones superfamily protein
Chr01	31453967	31457135	Phvul.001G114880.1	-
Chr01	31473732	31477047	Phvul.001G113400.2	+	PF03381		LEM3 (ligand-effect modulator 3) family protein / CDC50 family protein
Chr01	31492536	31496173	Phvul.001G113300.1	+	PF00076		RNA binding (RRM/RBD/RNP motifs) family protein
Chr01	31551086	31561172	Phvul.001G113200.1	+	PF12796,PF00415		ankyrin repeat family protein / regulator of chromosome condensation (RCC1) family protein
Chr01	31589446	31590167	Phvul.001G114580.1	+
Chr01	31777662	31781379	Phvul.001G112700.1	+	PF01915,PF00933		Glycosyl hydrolase family protein
Chr01	31814811	31818319	Phvul.001G112600.1	+	PF01915,PF00933		Glycosyl hydrolase family protein
Chr01	31880624	31882470	Phvul.001G112500.1	+	PF02458	SHT	spermidine hydroxycinnamoyl transferase
Chr01	32062901	32064627	Phvul.001G112400.1	-	PF02458	SHT	spermidine hydroxycinnamoyl transferase
Chr01	32172275	32175606	Phvul.001G112300.1	+	PF00999	ATCHX15,CHX15	cation/hydrogen exchanger 15
Chr01	32271968	32274380	Phvul.001G112200.1	+	PF00085	ACHT4	atypical CYS HIS rich thioredoxin 4
Chr01	32402481	32405011	Phvul.001G112100.1	-
Chr01	32409243	32413485	Phvul.001G113480.1	-	PF03016		Exostosin family protein
Chr01	32432675	32443705	Phvul.001G111900.1	+	PF02985,PF13646	emb2734	ARM repeat superfamily protein
Chr01	32466193	32467030	Phvul.001G111800.1	+	PF00847	RAP2.11	related to AP2 11
Chr01	32469459	32472511	Phvul.001G111700.1	-	PF03953,PF00091	TUA3	tubulin alpha-3
Chr01	32494306	32504043	Phvul.001G111600.1	+	PF00085	APRL5,ATAPRL5	APR-like 5
Chr01	32516232	32518086	Phvul.001G111500.1	+
Chr01	32576837	32577011	Phvul.001G111400.1	-		AGP14,ATAGP14	arabinogalactan protein 14
Chr01	32645764	32648120	Phvul.001G111300.1	+	PF07797		Protein of unknown function (DUF1639)
Chr01	32650090	32654821	Phvul.001G111200.1	-	PF13883,PF10615		FMN binding
Chr01	32663104	32664624	Phvul.001G111100.1	-
Chr01	32762247	32766121	Phvul.001G111000.3	-	PF01583	APK3	adenosine-5\'-phosphosulfate (APS) kinase 3
Chr01	32994316	32994904	Phvul.001G108400.1	+	PF00682	IMS1,IPMS2,MAML-3	2-isopropylmalate synthase 1
Chr01	33037296	33039533	Phvul.001G109780.1	+	PF08502	IMS1,IPMS2,MAML-3	2-isopropylmalate synthase 1
Chr01	33325226	33326119	Phvul.001G120400.2	-	PF00249	ATRL1,RL1,RSM2	RAD-like 1
Chr01	33410907	33413319	Phvul.001G120500.1	+	PF00166	CPN10	chaperonin 10
Chr01	33413390	33415968	Phvul.001G120600.1	-	PF00450	SCPL45	serine carboxypeptidase-like 45
Chr01	33418374	33421662	Phvul.001G120700.1	-	PF00450	SCPL45	serine carboxypeptidase-like 45
Chr01	33422703	33423811	Phvul.001G120800.1	-	PF12554	ATGIP1,GIP1	AtGCP3 interacting protein 1
Chr01	33448421	33449678	Phvul.001G120900.1	+
Chr01	33453844	33462529	Phvul.001G121000.1	-	PF00682		Aldolase superfamily protein
Chr01	33537123	33540474	Phvul.001G121100.1	+	PF03547	ATPIN1,PIN1	Auxin efflux carrier family protein
Chr01	33553690	33555719	Phvul.001G121200.1	+	PF00010		basic helix-loop-helix (bHLH) DNA-binding superfamily protein
Chr01	33567133	33569035	Phvul.001G121300.1	+
Chr01	33627150	33631117	Phvul.001G121400.1	-	PF13519,PF07975	ATGTF2H2,GTF2H2	general transcription factor II H2
Chr01	33646954	33652669	Phvul.001G121501.1	+	PF00069		Protein kinase superfamily protein
Chr01	33704631	33708158	Phvul.001G121600.1	+	PF00782		dual specificity protein phosphatase-related
Chr01	33710160	33715129	Phvul.001G121700.1	+	PF04161	ARV1	Arv1-like protein
Chr01	33716847	33724535	Phvul.001G121800.1	-	PF00627		Ubiquitin-associated (UBA) protein
Chr01	33759748	33762499	Phvul.001G121900.1	-	PF00646		F-box family protein
Chr01	33776724	33789337	Phvul.001G122000.2	-	PF00646		F-box family protein
Chr01	33803161	33804167	Phvul.001G122100.1	+	PF00394	ATLMCO4,IRX12,LAC4,LMCO4	Laccase/Diphenol oxidase family protein
Chr01	33816621	33818766	Phvul.001G122200.1	-	PF00646		F-box family protein
Chr01	33828333	33830461	Phvul.001G122300.1	-	PF00646		F-box family protein
Chr01	33839405	33840497	Phvul.001G122400.1	-
Chr01	33856660	33858005	Phvul.001G122500.1	+
Chr01	33856691	33859735	Phvul.001G122550.1	+
Chr01	33871371	33873495	Phvul.001G122600.1	-	PF00646		F-box family protein
Chr01	33887213	33888677	Phvul.001G122700.1	+	PF00076,PF14111
Chr01	33902445	33903409	Phvul.001G122800.1	+	PF13499	AGD11	ARF-GAP domain 11
Chr01	33910000	33916897	Phvul.001G122900.1	+	PF13812,PF01535	PPR596	PENTATRICOPEPTIDE REPEAT 596
Chr01	33920770	33925425	Phvul.001G123000.2	+	PF01055	PSL5,RSW3	Glycosyl hydrolases family 31 protein
Chr01	33928069	33945017	Phvul.001G123100.1	-	PF01751,PF02518,PF00986,PF00204	GYRB2	DNA GYRASE B2
Chr01	33959566	33964382	Phvul.001G123200.1	-	PF07058	ATMAP70-1,MAP70-1	microtubule-associated proteins 70-1
Chr01	34014947	34021329	Phvul.001G123300.2	-	PF07716,PF14144	BZIP45,TGA6	TGACG motif-binding factor 6
Chr01	34113387	34114306	Phvul.001G123400.1	+	PF05678		VQ motif-containing protein
Chr01	34123954	34124242	Phvul.001G123500.1	-
Chr01	34153283	34155952	Phvul.001G123600.1	-	PF01490		Transmembrane amino acid transporter family protein
Chr01	34164533	34166580	Phvul.001G123700.1	+
Chr01	34174661	34179830	Phvul.001G123800.1	+	PF02493,PF01504	PIP5K4	phosphatidyl inositol monophosphate 5 kinase 4
Chr01	34203164	34232631	Phvul.001G123900.1	+	PF01493,PF04898,PF01645,PF00310	FD-GOGAT,GLS1,GLU1,GLUS	glutamate synthase 1
Chr01	34235110	34235380	Phvul.001G124000.1	-
Chr01	34332872	34336361	Phvul.001G124100.1	+	PF11900,PF00651	BOP2	Ankyrin repeat family protein / BTB/POZ domain-containing protein
Chr01	34432156	34433155	Phvul.001G124150.1	+	PF12734
Chr01	34434600	34435222	Phvul.001G124200.1	-	PF13716		SEC14 cytosolic factor family protein / phosphoglyceride transfer family protein
Chr01	34453640	34457290	Phvul.001G124300.1	+	PF03807,PF14748	AT-P5C1,AT-P5R,EMB2772,P5CR	pyrroline-5- carboxylate (P5C) reductase
Chr01	34458498	34460022	Phvul.001G124400.1	-	PF05834	LYC	lycopene cyclase
Chr01	34461636	34463678	Phvul.001G124500.2	+	PF13716		SEC14 cytosolic factor family protein / phosphoglyceride transfer family protein
Chr01	34464711	34465713	Phvul.001G124600.1	-	PF12734
Chr01	34524713	34525771	Phvul.001G124700.1	+	PF08241		S-adenosyl-L-methionine-dependent methyltransferases superfamily protein
Chr01	34538509	34539822	Phvul.001G124800.1	+	PF08241		S-adenosyl-L-methionine-dependent methyltransferases superfamily protein
Chr01	34548736	34552918	Phvul.001G124900.5	+	PF00083	ATINT3,INT3	nositol transporter 3
Chr01	34561416	34562665	Phvul.001G125000.1	+	PF08241		S-adenosyl-L-methionine-dependent methyltransferases superfamily protein
Chr01	34588841	34592220	Phvul.001G125100.1	+	PF14852,PF14853	BIGYIN,FIS1A	Tetratricopeptide repeat (TPR)-like superfamily protein
Chr01	34593472	34597782	Phvul.001G125200.1	-	PF03871,PF01191	NRPE5,RPB5B	Eukaryotic rpb5 RNA polymerase subunit family protein
Chr01	34609127	34610363	Phvul.001G125300.1	-	PF00462		Glutaredoxin family protein
Chr01	34615716	34622957	Phvul.001G125400.1	-	PF01053	CBL	cystathionine beta-lyase
Chr01	34617999	34618575	Phvul.001G125500.1	+
Chr01	34665455	34666232	Phvul.001G125600.1	+
Chr01	34670655	34678660	Phvul.001G125700.2	-	PF09713		Plant protein 1589 of unknown function
Chr01	34724682	34726762	Phvul.001G125800.1	-	PF00072	ARR9,ATRR4	response regulator 9
Chr01	34805895	34809040	Phvul.001G125900.1	+	PF08450		Calcium-dependent phosphotriesterase superfamily protein
Chr01	34837849	34844185	Phvul.001G126000.1	+	PF08450	SSL2	strictosidine synthase-like 2
Chr01	34855610	34856108	Phvul.001G126100.1	+	PF00177		Ribosomal protein S7p/S5e family protein
Chr01	34876509	34881737	Phvul.001G126200.1	+	PF00153		Mitochondrial substrate carrier family protein
Chr01	34886911	34891093	Phvul.001G126300.1	+	PF13419		Haloacid dehalogenase-like hydrolase (HAD) superfamily protein
Chr01	34902349	34904631	Phvul.001G126400.1	+	PF00010	BHLH038,ORG2	basic helix-loop-helix (bHLH) DNA-binding superfamily protein

## Sheet: ALS3.1
Chrm	Start	End	transcriptName	Sense	Pfam	arabi-symbol	arabi-defline
Chr03	21192372	21194957	Phvul.003G092400.1	-	PF00102	DSPTP1	dual specificity protein phosphatase 1
Chr03	21351775	21352156	Phvul.003G092300.1	+
Chr03	21376116	21377599	Phvul.003G092200.1	+	PF14543,PF14541		Eukaryotic aspartyl protease family protein
Chr03	21473292	21474543	Phvul.003G092100.1	+	PF00026		Eukaryotic aspartyl protease family protein
Chr03	21554744	21559690	Phvul.003G092101.1	-	PF01532	MANIA,MNS2	alpha-mannosidase 2
Chr03	21560281	21564250	Phvul.003G092000.1	-	PF13041		Pentatricopeptide repeat (PPR-like) superfamily protein
Chr03	21567351	21568396	Phvul.003G091900.1	-	PF12854,PF13041		Pentatricopeptide repeat (PPR-like) superfamily protein
Chr03	21642655	21646459	Phvul.003G091800.1	+	PF13537	AILP1,ATAILP1	Aluminium induced protein with YGL and LRDR motifs
Chr03	21649978	21654935	Phvul.003G091700.2	-	PF01256		pfkB-like carbohydrate kinase family protein
Chr03	21659759	21664404	Phvul.003G091600.1	+	PF14416,PF13839	TBL11	TRICHOME BIREFRINGENCE-LIKE 11
Chr03	21681621	21686242	Phvul.003G091500.1	+	PF08825,PF00899	ECR1	E1 C-terminal related 1
Chr03	21688514	21689487	Phvul.003G091400.1	+
Chr03	21711195	21712677	Phvul.003G091300.1	+	PF13561		NAD(P)-binding Rossmann-fold superfamily protein
Chr03	21714820	21719749	Phvul.003G091200.1	+	PF04884	EMB1879,RUS6	Protein of unknown function, DUF647
Chr03	21725775	21728049	Phvul.003G091100.1	-	PF04770	AtHB31,HB31	homeobox protein 31
Chr03	21775829	21776437	Phvul.003G091000.1	-	PF08122		NADH dehydrogenase (ubiquinone)s
Chr03	21777388	21783927	Phvul.003G090900.1	+	PF12804	ATMEPCT,ISPD,MCT	Nucleotide-diphospho-sugar transferases superfamily protein
Chr03	21790249	21797264	Phvul.003G090800.1	-	PF00004,PF12169	STI	AAA-type ATPase family protein
Chr03	21868581	21875710	Phvul.003G090700.1	-	PF00628,PF12165	AL6	alfin-like 6
Chr03	21877427	21881781	Phvul.003G090600.1	+	PF14714,PF01926		GTP binding;GTP binding
Chr03	21884231	21886583	Phvul.003G090500.1	-	PF02719	ATUGE1,UGE1	UDP-D-glucose/UDP-D-galactose 4-epimerase 1
Chr03	21896079	21898787	Phvul.003G090501.1	-	PF02365	anac034,ANAC035,LOV1,NAC035	NAC domain containing protein 35
Chr03	21939748	21944043	Phvul.003G090400.1	-	PF05991
Chr03	21976098	21978377	Phvul.003G090300.1	+	PF01852		Polyketide cyclase/dehydrase and lipid transport superfamily protein
Chr03	22275694	22276166	Phvul.003G090301.1	-
Chr03	22298731	22299167	Phvul.003G090100.1	-
Chr03	22302425	22315120	Phvul.003G090000.1	+	PF07714		Leucine-rich repeat protein kinase family protein
Chr03	22315615	22324419	Phvul.003G090001.1	-			Tetratricopeptide repeat (TPR)-like superfamily protein
Chr03	22423822	22428363	Phvul.003G089900.1	+	PF00400		Transducin/WD40 repeat-like superfamily protein
Chr03	22433003	22442132	Phvul.003G089800.1	-	PF00999	ATNHX6,NHX6	Na+/H+ antiporter 6
Chr03	22708514	22709377	Phvul.003G089801.1	+	PF00177		Ribosomal protein S7p/S5e family protein
Chr03	22709434	22710621	Phvul.003G089802.1	+	PF00361		NADH-Ubiquinone/plastoquinone (complex I) protein
Chr03	22711028	22711643	Phvul.003G089803.1	+	PF00361		NADH-Ubiquinone/plastoquinone (complex I) protein
Chr03	22713380	22715024	Phvul.003G094800.1	-	PF00004		Chloroplast Ycf2;ATPase, AAA type, core
Chr03	23221583	23224172	Phvul.003G106000.1	-
Chr03	23229176	23235039	Phvul.003G105900.2	-	PF00651		BTB/POZ domain-containing protein
Chr03	23236933	23241099	Phvul.003G105800.1	-
Chr03	23241253	23243794	Phvul.003G105700.1	+	PF04548	ATTOC159,PPI2,TOC159,TOC160,TOC86	translocon at the outer envelope membrane of chloroplasts 159
Chr03	23245251	23257622	Phvul.003G105600.1	+	PF06827,PF08264,PF00133	OVA2	tRNA synthetase class I (I, L, M and V) family protein
Chr03	23261352	23267713	Phvul.003G105500.2	+	PF05185	ATPRMT4B,PRMT4B	protein arginine methyltransferase 4B
Chr03	23283940	23284356	Phvul.003G105400.1	+
Chr03	23291905	23292614	Phvul.003G105300.1	-	PF05498	RALFL33	ralf-like 33
Chr03	23297067	23298216	Phvul.003G105200.1	+	PF01249		Ribosomal protein S21e
Chr03	23322121	23325711	Phvul.003G105100.1	+	PF07973,PF01411		alanine-tRNA ligases;nucleic acid binding;ligases, forming aminoacyl-tRNA and related compounds;nucleotide binding;ATP binding
Chr03	23327495	23331297	Phvul.003G105000.1	+	PF00481		Protein phosphatase 2C family protein
Chr03	23350961	23352673	Phvul.003G104900.1	-	PF00403		Heavy metal transport/detoxification superfamily protein
Chr03	23401278	23403974	Phvul.003G104800.1	-	PF03016		Exostosin family protein
Chr03	23407044	23410400	Phvul.003G104700.1	+	PF13774,PF00957	ATVAMP724,VAMP724	vesicle-associated membrane protein 724
Chr03	23416176	23417171	Phvul.003G104600.1	-		ATFPF1,FPF1	flowering promoting factor 1
Chr03	23458362	23459816	Phvul.003G104500.1	-	PF03657		RNA binding
Chr03	23473307	23474468	Phvul.003G104400.1	-	PF00168	(AT)SRC2,SRC2	soybean gene regulated by cold-2
Chr03	23544753	23549376	Phvul.003G104200.1	+	PF00153		Mitochondrial substrate carrier family protein
Chr03	23578711	23584406	Phvul.003G104100.1	-
Chr03	23602390	23605043	Phvul.003G104000.1	-	PF00400		Transducin/WD40 repeat-like superfamily protein
Chr03	23791052	23794878	Phvul.003G103900.1	+	PF00083	ATINT2,INT2	inositol transporter 2
Chr03	23802847	23805100	Phvul.003G103800.1	+	PF02536		Mitochondrial transcription termination factor family protein
Chr03	23823974	23824132	Phvul.003G103801.1	+	PF04758		Ribosomal protein S30 family protein
Chr03	23824999	23826175	Phvul.003G103700.1	+	PF02536		Mitochondrial transcription termination factor family protein
Chr03	23834533	23835000	Phvul.003G103600.1	-
Chr03	23913013	23913903	Phvul.003G103500.1	-	PF00808	NF-YB5	nuclear factor Y, subunit B5
Chr03	23915181	23920311	Phvul.003G103501.1	-	PF01061,PF08370	ABCG40,ATABCG40,ATPDR12,PDR12	pleiotropic drug resistance 12
Chr03	23917461	23917836	Phvul.003G103400.1	-		ABCG40,ATABCG40,ATPDR12,PDR12	pleiotropic drug resistance 12
Chr03	23989293	23996510	Phvul.003G103300.1	+	PF10557,PF00888	ATCUL1,AXR6,CUL1	cullin 1
Chr03	24001106	24003097	Phvul.003G103200.2	+	PF13812,PF01535,PF13041		Tetratricopeptide repeat (TPR)-like superfamily protein
Chr03	24009030	24017805	Phvul.003G103100.1	-	PF07496		CW-type Zinc Finger
Chr03	24092556	24102219	Phvul.003G103000.1	+	PF00571,PF16561	ATSNF4,SNF4	homolog of yeast sucrose nonfermenting 4
Chr03	24103285	24130655	Phvul.003G103001.1	-	PF00249,PF06584	ALY3,ATALY3	DNA binding
Chr03	24139865	24141879	Phvul.003G102700.1	-	PF02536		Mitochondrial transcription termination factor family protein
Chr03	24208960	24213709	Phvul.003G102600.2	+	PF00642		Zinc finger C-x8-C-x5-C-x3-H type family protein
Chr03	24220009	24221506	Phvul.003G102500.1	-	PF00847	PUCHI	Integrase-type DNA-binding superfamily protein
Chr03	24233609	24240048	Phvul.003G102400.1	+	PF13499	EMB40,FASS,FASS 2,FS1,GDO,TON2	tonneau 2 (TON2)
Chr03	24251141	24257411	Phvul.003G102300.1	-	PF13041,PF01535		Tetratricopeptide repeat (TPR)-like superfamily protein
Chr03	24261848	24262160	Phvul.003G102200.1	+	PF00163		Ribosomal protein S4
Chr03	24341469	24348390	Phvul.003G102100.1	+	PF01344,PF13418		Galactose oxidase/kelch repeat superfamily protein
Chr03	24377178	24378207	Phvul.003G102000.1	-	PF00462		Thioredoxin superfamily protein
Chr03	24486865	24487593	Phvul.003G101900.1	+	PF00462		Glutaredoxin family protein
Chr03	24580432	24581691	Phvul.003G101800.1	+	PF00069		Protein kinase superfamily protein
Chr03	24586194	24595350	Phvul.003G101700.1	-	PF09110,PF04851,PF00271,PF09111	CHR17	chromatin remodeling factor17
Chr03	24596825	24598096	Phvul.003G101600.1	-
Chr03	24615789	24619834	Phvul.003G101500.1	+	PF13923,PF05495,PF14599		CHY-type/CTCHY-type/RING-type Zinc finger protein
Chr03	24696404	24701000	Phvul.003G101400.1	+
Chr03	24705371	24706319	Phvul.003G101300.1	-	PF00010	RGE1,ZOU	basic helix-loop-helix (bHLH) DNA-binding superfamily protein
Chr03	24708556	24711340	Phvul.003G101200.1	-	PF04535		Uncharacterised protein family (UPF0497)
Chr03	24918322	24920033	Phvul.003G095200.1	-
Chr03	25007316	25009300	Phvul.003G095201.1	+		ATHS83,AtHsp90-1,ATHSP90.1,HSP81-1,HSP81.1,HSP83,HSP90.1	heat shock protein 90.1
Chr03	25142130	25144241	Phvul.003G097900.1	+	PF01536	BUD2,SAMDC4	Adenosylmethionine decarboxylase family protein
Chr03	25152070	25155651	Phvul.003G098000.1	+	PF00481		Protein phosphatase 2C family protein
Chr03	25164596	25168745	Phvul.003G098100.1	+	PF13920		RING/U-box superfamily protein
Chr03	25181759	25189149	Phvul.003G098200.1	+	PF00391,PF01326,PF02896	PPDK	pyruvate orthophosphate dikinase
Chr03	25197648	25199607	Phvul.003G098300.1	+	PF00588		tRNA/rRNA methyltransferase (SpoU) family protein
Chr03	25201530	25202151	Phvul.003G098400.1	-	PF05078	AtDMP2,DMP2	DUF679 domain membrane protein 2
Chr03	25251902	25252798	Phvul.003G098500.1	-	PF05078	AtDMP2,DMP2	DUF679 domain membrane protein 2
Chr03	25374506	25375326	Phvul.003G098600.1	-	PF04864		Pyridoxal phosphate (PLP)-dependent transferases superfamily protein
Chr03	25391781	25393091	Phvul.003G098700.1	-	PF15365
Chr03	25402125	25405364	Phvul.003G098800.1	+
Chr03	25465364	25468548	Phvul.003G098900.1	+	PF01549,PF03171		2-oxoglutarate (2OG) and Fe(II)-dependent oxygenase superfamily protein
Chr03	25509856	25511458	Phvul.003G099000.1	+	PF01627	AHP1	histidine-containing phosphotransmitter 1
Chr03	25512370	25536716	Phvul.003G099100.2	-	PF01156		inosine-uridine preferring nucleoside hydrolase family protein
Chr03	25559195	25559953	Phvul.003G099200.1	-
Chr03	25577749	25579055	Phvul.003G099300.1	+	PF01453,PF08276		S-locus lectin protein kinase family protein
Chr03	25644768	25646381	Phvul.003G099400.1	-	PF00076,PF14111
Chr03	25650552	25655309	Phvul.003G099500.1	+	PF00076	SCL28	SC35-like splicing factor 28
Chr03	25701609	25705849	Phvul.003G099600.1	+	PF02780,PF02779,PF13292	CLA,CLA1,DEF,DXPS2,DXS	Deoxyxylulose-5-phosphate synthase
Chr03	25708026	25708491	Phvul.003G099700.1	-	PF00403		Heavy metal transport/detoxification superfamily protein
Chr03	25917818	25919532	Phvul.003G097800.1	+	PF01501	GATL4	galacturonosyltransferase-like 4
Chr03	25940606	25945235	Phvul.003G097700.1	-	PF00928		clathrin adaptor complexes medium subunit family protein
Chr03	25946642	25952844	Phvul.003G097600.1	-	PF12937,PF13516		F-box/RNI-like superfamily protein
Chr03	25960291	25961173	Phvul.003G097500.1	-	PF13837		Alcohol dehydrogenase transcription factor Myb/SANT-like family protein
Chr03	26033282	26037962	Phvul.003G097400.1	+	PF00201	UGT73B4	UDP-glycosyltransferase 73B4
Chr03	26189194	26190884	Phvul.003G097300.1	+	PF00201	UGT73B4	UDP-glycosyltransferase 73B4
Chr03	26262826	26264248	Phvul.003G097200.1	+	PF00201	UGT73B4	UDP-glycosyltransferase 73B4
Chr03	26393495	26397910	Phvul.003G106200.1	+	PF02727,PF02728,PF01179		Copper amine oxidase family protein
Chr03	26408111	26409228	Phvul.003G106300.1	+	PF05512		AWPM-19-like family protein
Chr03	26413162	26417212	Phvul.003G106301.1	-		ATRBOHD,RBOHD	respiratory burst oxidase homologue D
Chr03	26514034	26514794	Phvul.003G106302.1	+
Chr03	26540555	26542910	Phvul.003G106500.1	-	PF01554		MATE efflux family protein
Chr03	26658101	26663191	Phvul.003G106700.1	+	PF02817,PF00364,PF00198	BCE2,DIN3,LTA1	2-oxoacid dehydrogenases acyltransferase family protein
Chr03	26676451	26680151	Phvul.003G106800.1	+	PF01557		Fumarylacetoacetate (FAA) hydrolase family
Chr03	26706174	26708227	Phvul.003G106900.2	-	PF12697		alpha/beta-Hydrolases superfamily protein
Chr03	26718809	26726097	Phvul.003G107000.1	-	PF01336,PF00152	ATKRS-1	lysyl-tRNA synthetase 1
Chr03	26818746	26819096	Phvul.003G099800.1	+
Chr03	26905328	26908593	Phvul.003G099900.1	+	PF13962,PF12796		Ankyrin repeat family protein
Chr03	26909882	26914392	Phvul.003G100000.1	-	PF00226,PF11926		DNAJ heat shock N-terminal domain-containing protein
Chr03	26950875	26952735	Phvul.003G100100.1	-	PF01535,PF13041		Tetratricopeptide repeat (TPR)-like superfamily protein
Chr03	26954243	26979033	Phvul.003G100200.1	-	PF04851,PF00271,PF14619	CHR3,SYD	P-loop containing nucleoside triphosphate hydrolases superfamily protein
Chr03	27013314	27014372	Phvul.003G100300.1	+
Chr03	27031457	27032560	Phvul.003G100400.1	-	PF00550	ACP4	acyl carrier protein 4
Chr03	27051651	27055994	Phvul.003G100500.1	+	PF00635	VAP27-2	vamp/synaptobrevin-associated protein 27-2
Chr03	27057886	27061804	Phvul.003G100600.1	-	PF00999	ATNHX2,NHX2	sodium hydrogen exchanger 2
Chr03	27129617	27133239	Phvul.003G100700.1	+	PF00646,PF01167	AtTLP3,TLP3	tubby like protein 3
Chr03	27135913	27137631	Phvul.003G100800.1	-	PF15459,PF04935		Surfeit locus protein 6
Chr03	27139843	27144727	Phvul.003G100900.1	-	PF00069		Protein kinase superfamily protein
Chr03	27147731	27154114	Phvul.003G101000.1	+	PF00646
Chr03	27154411	27156485	Phvul.003G101100.1	-	PF04535		Uncharacterised protein family (UPF0497)
Chr03	27209462	27210754	Phvul.003G107100.1	-	PF13639	ATL2,TL2	TOXICOS EN LEVADURA 2
Chr03	27232183	27234416	Phvul.003G107300.1	-	PF04043,PF01095		Plant invertase/pectin methylesterase inhibitor superfamily
Chr03	27266384	27266933	Phvul.003G107400.1	+	PF00319	AGL62	AGAMOUS-like 62
Chr03	27267536	27269794	Phvul.003G107500.1	-	PF12708		Pectin lyase-like superfamily protein
Chr03	27270902	27271543	Phvul.003G107600.1	-
Chr03	27273652	27275164	Phvul.003G107700.1	+			plastid developmental protein DAG, putative
Chr03	27276303	27282058	Phvul.003G107800.2	+	PF13414		Tetratricopeptide repeat (TPR)-like superfamily protein
Chr03	27314860	27316010	Phvul.003G108000.1	-			glycine-rich protein
Chr03	27415374	27421404	Phvul.003G108100.1	-	PF00141		Peroxidase superfamily protein
Chr03	27438631	27441399	Phvul.003G108200.1	+	PF00481		Protein phosphatase 2C family protein
Chr03	27448307	27453689	Phvul.003G108300.1	+
Chr03	27454084	27460032	Phvul.003G108400.1	-	PF03893,PF01764		Mono-/di-acylglycerol lipase, N-terminal;Lipase, class 3
Chr03	27468114	27469600	Phvul.003G108500.1	+	PF00226		Chaperone DnaJ-domain superfamily protein
Chr03	27469781	27477667	Phvul.003G108600.1	-	PF08144	APUM24,PUM24	pumilio 24
Chr03	27510498	27513498	Phvul.003G108700.1	+	PF00295		Pectin lyase-like superfamily protein
Chr03	27516904	27525295	Phvul.003G108800.1	+	PF04003,PF00400		transducin family protein / WD-40 repeat family protein
Chr03	27536959	27538128	Phvul.003G108900.1	-	PF00403		Heavy metal transport/detoxification superfamily protein
Chr03	27539299	27540329	Phvul.003G109000.1	-	PF00407	MLP423	MLP-like protein 423
Chr03	27561952	27562969	Phvul.003G109100.1	-	PF00407	MLP423	MLP-like protein 423
Chr03	27588463	27589421	Phvul.003G109200.1	-	PF00407	MLP423	MLP-like protein 423
Chr03	27693192	27694025	Phvul.003G109300.1	+	PF00407	MLP423	MLP-like protein 423
Chr03	27707654	27708420	Phvul.003G109301.1	-	PF00407	MLP423	MLP-like protein 423
Chr03	27735009	27735748	Phvul.003G109500.1	-	PF00407	MLP423	MLP-like protein 423
Chr03	27762721	27763391	Phvul.003G109400.1	-	PF00407	MLP423	MLP-like protein 423
Chr03	27824571	27825142	Phvul.003G109401.1	-	PF00407	MLP423	MLP-like protein 423
Chr03	27837658	27838454	Phvul.003G109600.1	-	PF00407	MLP423	MLP-like protein 423
Chr03	27910492	27911322	Phvul.003G109601.1	+	PF00407	MLP423	MLP-like protein 423
Chr03	27965471	27966248	Phvul.003G109602.1	+	PF00407	MLP423	MLP-like protein 423
Chr03	27980137	27980966	Phvul.003G109603.1	+	PF00407	MLP423	MLP-like protein 423
Chr03	27999825	28000610	Phvul.003G109800.1	+	PF00407	MLP423	MLP-like protein 423
Chr03	28183125	28183832	Phvul.003G109801.1	+	PF00407	MLP423	MLP-like protein 423
Chr03	28211949	28212948	Phvul.003G109802.1	+	PF00407	MLP423	MLP-like protein 423
Chr03	28228393	28232643	Phvul.003G110000.1	+	PF05623		Protein of unknown function (DUF789)
Chr03	28273222	28277353	Phvul.003G110100.1	+	PF00249,PF00072	ARR1,RR1	response regulator 1
Chr03	28304986	28307628	Phvul.003G110200.1	-	PF04833	ATSEB1,COBL7,SEB1	COBRA-like protein-7 precursor
Chr03	28319153	28320492	Phvul.003G110300.1	+
Chr03	28339589	28340677	Phvul.003G110400.1	-	PF00320	GATA17	GATA transcription factor 17
Chr03	28345646	28350300	Phvul.003G110500.1	-	PF16186,PF01749,PF00514	AIMP ALPHA,AT-IMP,ATKAP ALPHA,IMPA-1,IMPA1	importin alpha isoform 1
Chr03	28383475	28384841	Phvul.003G110600.1	-	PF06749		Protein of unknown function (DUF1218)
Chr03	28399039	28401481	Phvul.003G110700.1	+	PF12776
Chr03	28413278	28413665	Phvul.003G110800.1	+		ZFP7	zinc finger protein 7
Chr03	28437845	28441686	Phvul.003G110900.1	+	PF14383,PF14309
Chr03	28447498	28455441	Phvul.003G111000.1	-	PF08969,PF01398	AMSH3	associated molecule with the SH3 domain of STAM 3
Chr03	28472722	28480198	Phvul.003G111100.1	+	PF15985		PNAS-3 related
Chr03	28505836	28506976	Phvul.003G111200.1	+		AWI31,VEP1	NAD(P)-binding Rossmann-fold superfamily protein
Chr03	28558544	28559675	Phvul.003G111300.1	-	PF01370	AWI31,VEP1	NAD(P)-binding Rossmann-fold superfamily protein
Chr03	28662524	28671278	Phvul.003G111400.1	-	PF13193,PF00501	AAE7,ACN1	acyl-activating enzyme 7
Chr03	28712657	28720194	Phvul.003G111900.1	+	PF01833,PF00612,PF03859		calmodulin binding;transcription regulators
Chr03	28721247	28723187	Phvul.003G112000.1	-	PF08477	ASAR1,ATSAR2,ATSARA1C,SAR2	secretion-associated RAS super family 2
Chr03	28741857	28744410	Phvul.003G112100.1	-	PF08477	ASAR1,ATSAR2,ATSARA1C,SAR2	secretion-associated RAS super family 2
Chr03	28744930	28745755	Phvul.003G112200.1	+	PF01779		Ribosomal L29e protein family
Chr03	28749380	28756802	Phvul.003G112300.1	-	PF01134,PF00070,PF02852	LPD1,ptlpd1	lipoamide dehydrogenase 1
Chr03	28774387	28791815	Phvul.003G112400.1	+	PF04802		binding
Chr03	28795252	28796748	Phvul.003G112500.1	+	PF13917		zinc knuckle (CCHC-type) family protein
Chr03	28806296	28809361	Phvul.003G112600.2	+	PF01096,PF02150	NRPB9A,NRPD9A,NRPE9A	RNA polymerases M/15 Kd subunit
Chr03	28811274	28811817	Phvul.003G112700.1	-
Chr03	28817068	28817551	Phvul.003G112800.1	-
Chr03	28845053	28845738	Phvul.003G112900.1	-
Chr03	28881050	28881612	Phvul.003G113000.2	-
Chr03	28897933	28898446	Phvul.003G113100.1	-
Chr03	28900673	28903497	Phvul.003G113200.1	-	PF02900		catalytic LigB subunit of aromatic ring-opening dioxygenase family
Chr03	28938370	28938634	Phvul.003G113300.1	-
Chr03	28965370	28967140	Phvul.003G113400.1	-	PF03070		Haem oxygenase-like, multi-helical
Chr03	28980598	28988797	Phvul.003G113500.1	-	PF00171	ALDH22A1	aldehyde dehydrogenase 22A1
Chr03	29015847	29016561	Phvul.003G113600.1	+
Chr03	29028597	29030793	Phvul.003G113700.1	+	PF03140
Chr03	29030909	29033108	Phvul.003G113800.1	-	PF00179	UBC32	ubiquitin-conjugating enzyme 32
Chr03	29050067	29060564	Phvul.003G113900.1	-			Nucleic acid-binding proteins superfamily
Chr03	29080480	29082127	Phvul.003G114000.2	+	PF00583		Acyl-CoA N-acyltransferases (NAT) superfamily protein
Chr03	29097270	29101747	Phvul.003G114100.1	-	PF07719	HCF107	high chlorophyll fluorescent 107
Chr03	29120918	29123167	Phvul.003G114200.1	+	PF03018		Disease resistance-responsive (dirigent-like protein) family protein
Chr03	29139498	29145095	Phvul.003G114300.2	+	PF00549,PF00285	ACLB-1	ATP-citrate lyase B-1
Chr03	29146904	29154377	Phvul.003G114400.1	+	PF00989,PF07714		PAS domain-containing protein tyrosine kinase family protein
Chr03	29156975	29158841	Phvul.003G114500.2	-			DNA-binding enhancer protein-related
Chr03	29165923	29167462	Phvul.003G114600.1	+
Chr03	29179920	29180893	Phvul.003G114700.3	+
Chr03	29208887	29210475	Phvul.003G114800.1	+	PF00657		GDSL-like Lipase/Acylhydrolase superfamily protein
Chr03	29230776	29231899	Phvul.003G114900.1	+	PF04674	EXL6	EXORDIUM like 6
Chr03	29257183	29257642	Phvul.003G115000.1	-	PF04043		Plant invertase/pectin methylesterase inhibitor superfamily protein
Chr03	29308292	29310549	Phvul.003G115100.1	+	PF16113	E-COAH-2,ECHIA	enoyl-CoA hydratase/isomerase A
Chr03	29311332	29312310	Phvul.003G115200.1	-	PF00179	PFU2,UBC23	ubiquitin-conjugating enzyme 23
Chr03	29329389	29330391	Phvul.003G115300.1	+	PF00179	PFU2,UBC23	ubiquitin-conjugating enzyme 23
Chr03	29384594	29385949	Phvul.003G115400.1	+	PF00179	PFU2,UBC23	ubiquitin-conjugating enzyme 23
Chr03	29432048	29436253	Phvul.003G115500.1	+	PF00481		Protein phosphatase 2C family protein
Chr03	29440009	29448074	Phvul.003G115600.1	+
Chr03	29459794	29462845	Phvul.003G115700.1	-
Chr03	29469767	29470691	Phvul.003G115800.2	+	PF13499,PF13202	ATCP1,CP1	Ca2+-binding protein 1
Chr03	29490158	29490603	Phvul.003G115900.1	+
Chr03	29496385	29501705	Phvul.003G116100.1	-	PF14551,PF12619,PF00493	ATMCM2,MCM2	minichromosome maintenance (MCM2/3/5) family protein
Chr03	29525201	29526191	Phvul.003G116200.1	+			basic helix-loop-helix (bHLH) DNA-binding superfamily protein
Chr03	29586942	29589127	Phvul.003G116300.1	+	PF03106	ATWRKY48,WRKY48	WRKY DNA-binding protein 48
Chr03	29625250	29636405	Phvul.003G116400.1	-	PF00397,PF00076	FCA	RNA binding;abscisic acid binding
Chr03	29641471	29642041	Phvul.003G116500.1	+	PF04043	ATC/VIF1,C/VIF1	cell wall / vacuolar inhibitor of fructosidase 1
Chr03	29709463	29716006	Phvul.003G116600.1	+	PF00009	QQT2	P-loop containing nucleoside triphosphate hydrolases superfamily protein
Chr03	29717798	29723004	Phvul.003G116700.1	+	PF00288,PF08544,PF10509	GAL1,GALK	Mevalonate/galactokinase family protein
Chr03	29776333	29779643	Phvul.003G116800.1	+
Chr03	29780916	29781483	Phvul.003G116900.1	-	PF04043		Plant invertase/pectin methylesterase inhibitor superfamily protein
Chr03	29785122	29787248	Phvul.003G117000.3	+	PF00141		Peroxidase superfamily protein
Chr03	29787565	29788433	Phvul.003G117100.1	-	PF04043	ATC/VIF1,C/VIF1	cell wall / vacuolar inhibitor of fructosidase 1
Chr03	29789576	29790334	Phvul.003G117200.1	-	PF04043	ATC/VIF1,C/VIF1	cell wall / vacuolar inhibitor of fructosidase 1
Chr03	29800750	29801293	Phvul.003G117300.1	-	PF04043	ATC/VIF1,C/VIF1	cell wall / vacuolar inhibitor of fructosidase 1
Chr03	29821095	29821638	Phvul.003G117400.1	-	PF04043	ATC/VIF1,C/VIF1	cell wall / vacuolar inhibitor of fructosidase 1
Chr03	29832896	29833836	Phvul.003G117500.1	-	PF03004
Chr03	29868524	29870450	Phvul.003G117600.2	+
Chr03	29890191	29892434	Phvul.003G117700.1	-	PF08646		Nucleic acid-binding, OB-fold-like protein
Chr03	29955483	29961622	Phvul.003G117800.1	+	PF07779		O-acetyltransferase family protein
Chr03	30016265	30016830	Phvul.003G117900.2	+	PF04398		Protein of unknown function, DUF538
Chr03	30018925	30021808	Phvul.003G118000.1	-	PF00450	scpl33	serine carboxypeptidase-like 33
Chr03	30025199	30030289	Phvul.003G118100.1	-	PF00150,PF00232	ATSFR2,SFR2	Glycosyl hydrolase superfamily protein
Chr03	30045355	30048571	Phvul.003G118200.1	+	PF15630	TAF9,TAFII21	TATA binding protein associated factor 21kDa subunit
Chr03	30063531	30067485	Phvul.003G118300.1	+	PF14226,PF03171	ATGA2OX4,GA2OX4	gibberellin 2-oxidase 4
Chr03	30068138	30073208	Phvul.003G118400.1	-	PF12899		Plant neutral invertase family protein
Chr03	30087888	30090134	Phvul.003G118450.1	-	PF00249	AtMYB78,MYB78	myb domain protein 78
Chr03	30148723	30175629	Phvul.003G118500.1	+	PF00632	UPL6	ubiquitin protein ligase 6
Chr03	30176254	30179810	Phvul.003G118600.1	-	PF00575	ARRPS1,RPS1	ribosomal protein S1
Chr03	30194014	30196734	Phvul.003G118700.1	+	PF07572
Chr03	30197488	30200396	Phvul.003G118800.1	-	PF01134,PF00070,PF02852	mtLPD1	mitochondrial lipoamide dehydrogenase 1
Chr03	30201958	30204458	Phvul.003G118900.1	-	PF00481		Protein phosphatase 2C family protein
Chr03	33857085	33862590	Phvul.003G142500.1	-	PF02485		Core-2/I-branching beta-1,6-N-acetylglucosaminyltransferase family protein
Chr03	33866172	33868589	Phvul.003G142400.1	-	PF02485		Core-2/I-branching beta-1,6-N-acetylglucosaminyltransferase family protein
Chr03	33892072	33892588	Phvul.003G142300.1	+	PF14009
Chr03	33904718	33905858	Phvul.003G142200.1	+		AWI31,VEP1	NAD(P)-binding Rossmann-fold superfamily protein
Chr03	33913858	33916048	Phvul.003G142100.2	-	PF01237	ORP4B	OSBP(oxysterol binding protein)-related protein 4B
Chr03	33920551	33923052	Phvul.003G142000.1	-	PF01237	ORP4B	OSBP(oxysterol binding protein)-related protein 4B
Chr03	33924663	33929700	Phvul.003G141900.1	-	PF01237	ORP4C	OSBP(oxysterol binding protein)-related protein 4C
Chr03	33930879	33938142	Phvul.003G141800.1	-	PF02225,PF06280,PF05922,PF00082	SLP3	subtilisin-like serine protease 3
Chr03	33951612	33957497	Phvul.003G141700.1	+	PF00566		Ypt/Rab-GAP domain of gyp1p superfamily protein
Chr03	33971628	33972701	Phvul.003G141600.2	+
Chr03	33974307	33980037	Phvul.003G141500.1	-	PF07651		ENTH/ANTH/VHS superfamily protein
Chr03	33984503	33989960	Phvul.003G141400.1	+	PF00046,PF00628	PRHA	pathogenesis related homeodomain protein A
Chr03	33991171	33999045	Phvul.003G141300.3	-	PF00383	emb2191	Cytidine/deoxycytidylate deaminase family protein
Chr03	34020362	34023820	Phvul.003G141200.1	-	PF06203	CIA2	chloroplast import apparatus 2
Chr03	34036805	34042754	Phvul.003G141100.1	+	PF00013	PEP	RNA-binding KH domain-containing protein
Chr03	34044424	34046068	Phvul.003G141000.1	+	PF01187		Tautomerase/MIF superfamily protein
Chr03	34047211	34051894	Phvul.003G140900.1	-	PF10253
Chr03	34058876	34065935	Phvul.003G140800.1	-	PF00010		basic helix-loop-helix (bHLH) DNA-binding superfamily protein
Chr03	34107960	34112694	Phvul.003G140700.2	+	PF01532	MANIB,MNS1	alpha-mannosidase 1
Chr03	34137919	34142063	Phvul.003G140726.1	+	PF02861		Clp amino terminal domain-containing protein
Chr03	34155175	34156338	Phvul.003G140500.1	+	PF12695	LysoPL2	lysophospholipase 2
Chr03	34157197	34166839	Phvul.003G140400.1	-	PF09758
Chr03	34187766	34188312	Phvul.003G140426.1	+
Chr03	34207931	34212358	Phvul.003G140452.1	+	PF05022
Chr03	34227225	34250195	Phvul.003G140200.1	+	PF00690,PF12515,PF00702,PF00689,PF00122	ACA8,AT-ACA8	autoinhibited Ca2+ -ATPase, isoform 8
Chr03	34250559	34254880	Phvul.003G140100.2	-	PF00355,PF00848		choline monooxygenase, putative (CMO-like)
Chr03	34258350	34260100	Phvul.003G140000.1	-	PF01535,PF13041		Tetratricopeptide repeat (TPR)-like superfamily protein
Chr03	34269166	34269685	Phvul.003G139900.1	-	PF00319	AGL62	AGAMOUS-like 62
Chr03	34291172	34295266	Phvul.003G139800.1	+	PF13855	PIRL6	plant intracellular ras group-related LRR 6
Chr03	34304075	34309392	Phvul.003G139700.1	+	PF03151		Nucleotide/sugar transporter family protein
Chr03	34315796	34318865	Phvul.003G139600.1	-	PF03547	AGR,AGR1,ATPIN2,EIR1,PIN2,WAV6	Auxin efflux carrier family protein
Chr03	34329184	34330824	Phvul.003G139500.1	+	PF10533,PF03106	ATWRKY11,WRKY11	WRKY DNA-binding protein 11
Chr03	34350978	34351822	Phvul.003G139400.1	-
Chr03	34359787	34360826	Phvul.003G139300.1	-			Protein kinase superfamily protein
Chr03	34375195	34377784	Phvul.003G139200.1	-	PF00069		Protein kinase superfamily protein
Chr03	34380469	34387137	Phvul.003G139226.1	-	PF09753		Membrane fusion protein Use1
Chr03	34388384	34390953	Phvul.003G138900.1	-	PF08561		Mitochondrial ribosomal protein L37
Chr03	34396693	34401787	Phvul.003G138800.1	-			Thioredoxin superfamily protein
Chr03	34408072	34415107	Phvul.003G138826.1	-	PF09753		Membrane fusion protein Use1
Chr03	34408390	34409296	Phvul.003G139100.1	-
Chr03	34411673	34412427	Phvul.003G139126.1	+
Chr03	34416210	34418637	Phvul.003G139152.1	-	PF08561		Mitochondrial ribosomal protein L37
Chr03	34424395	34429487	Phvul.003G139178.1	-			Thioredoxin superfamily protein
Chr03	34435759	34446763	Phvul.003G138700.1	-	PF09753		Membrane fusion protein Use1
Chr03	34449120	34457114	Phvul.003G138600.1	-	PF00134		Cyclin family protein
Chr03	34466188	34474280	Phvul.003G138500.1	+	PF08007
Chr03	34474408	34475232	Phvul.003G138526.1	-
Chr03	34480356	34480842	Phvul.003G138300.1	+
Chr03	34482300	34482774	Phvul.003G138326.1	+
Chr03	34497406	34498879	Phvul.003G138200.1	+	PF00046	HAT14	homeobox from Arabidopsis thaliana
Chr03	34519664	34522309	Phvul.003G138226.1	-	PF08541,PF08392	KCS11	3-ketoacyl-CoA synthase 11
Chr03	34552509	34557154	Phvul.003G138252.1	-	PF04564		ARM repeat superfamily protein
Chr03	34619067	34620785	Phvul.003G138278.1	+	PF14531,PF03822	CIPK4,SnRK3.3	CBL-interacting protein kinase 4
Chr03	34714861	34719245	Phvul.003G138304.1	-	PF01544	ATMGT9,MGT9,MRS2-2	magnesium transporter 9
Chr03	34784055	34786648	Phvul.003G138330.1	-	PF02309	IAA14,SLR	indole-3-acetic acid inducible 14
Chr03	34868884	34869208	Phvul.003G138356.1	-	PF01248		Ribosomal protein L7Ae/L30e/S12e/Gadd45 family protein
Chr03	34896151	34897866	Phvul.003G138382.1	+	PF02309	IAA3,SHY2	AUX/IAA transcriptional regulator family protein
Chr03	34919341	34936372	Phvul.003G138408.1	-	PF01532		Glycosyl hydrolase family 47 protein
Chr03	34941262	34944492	Phvul.003G138434.1	-	PF10153		Protein of unknown function (DUF2361)
Chr03	34946993	34970783	Phvul.003G138460.1	-	PF06241		Protein of unknown function (DUF1012)
Chr03	35001420	35001735	Phvul.003G138486.1	-
Chr03	35064233	35068904	Phvul.003G143300.1	-	PF01263		Galactose mutarotase-like superfamily protein
Chr03	35072057	35088692	Phvul.003G143200.1	-	PF02209,PF00626	ATVLN4,VLN4	villin 4
Chr03	35127294	35127586	Phvul.003G143266.1	+
Chr03	35151373	35152549	Phvul.003G143332.1	+	PF00722	XTH23,XTR6	xyloglucan endotransglycosylase 6
Chr03	35164340	35165419	Phvul.003G143400.2	+	PF00141		Peroxidase superfamily protein
Chr03	35179998	35183182	Phvul.003G143500.1	-
Chr03	35196984	35198992	Phvul.003G143600.1	-
Chr03	35214586	35215213	Phvul.003G143700.1	-			sequence-specific DNA binding transcription factors;transcription regulators
Chr03	35225695	35233022	Phvul.003G143800.1	-	PF00690,PF00702,PF00122	AHA2,HA2,PMA2	H(+)-ATPase 2
Chr03	35259233	35264036	Phvul.003G143900.1	-	PF01040	ATHPT,HPT1,TPT1,VTE2	homogentisate phytyltransferase 1
Chr03	35291387	35295514	Phvul.003G144000.1	+			hydroxyproline-rich glycoprotein family protein
Chr03	35299360	35308316	Phvul.003G144100.1	+	PF07676		Transducin/WD40 repeat-like superfamily protein
Chr03	35310112	35314154	Phvul.003G144200.1	-	PF07714		Protein kinase superfamily protein
Chr03	35333838	35338825	Phvul.003G144300.1	+	PF08648
Chr03	35341767	35346938	Phvul.003G144400.1	-	PF00041,PF07227	VEL1	vernalization5/VIN3-like
Chr03	35374368	35378152	Phvul.003G144500.1	-	PF00847	AIL5,CHO1,EMK	AINTEGUMENTA-like 5
Chr03	35392311	35399014	Phvul.003G145200.1	-	PF01336,PF08784	ATRPA2,ATRPA32A,ROR1,RPA2,RPA32A	replicon protein A2
Chr03	35412759	35413375	Phvul.003G145250.1	+		ORP4B	OSBP(oxysterol binding protein)-related protein 4B
Chr03	35426868	35432605	Phvul.003G145300.1	-	PF11559		Afadin/alpha-actinin-binding protein
Chr03	35464053	35469440	Phvul.003G145400.1	+	PF00175,PF00258,PF00667	AR2,ATR2	P450 reductase 2
Chr03	35478204	35480924	Phvul.003G145500.1	-	PF01423	RUXF	small nuclear ribonucleoprotein F
Chr03	35494553	35496021	Phvul.003G145600.1	+	PF02309	IAA33	indole-3-acetic acid inducible 33
Chr03	35500605	35506233	Phvul.003G145700.1	-	PF13419	GPP2,GS1	Haloacid dehalogenase-like hydrolase (HAD) superfamily protein
Chr03	35512264	35515206	Phvul.003G145800.1	-	PF13419	GPP2,GS1	Haloacid dehalogenase-like hydrolase (HAD) superfamily protein
Chr03	35523772	35524487	Phvul.003G145900.1	+	PF15511		Histone superfamily protein
Chr03	35535668	35537194	Phvul.003G146000.1	+
Chr03	35556333	35558944	Phvul.003G146100.1	-	PF10291
Chr03	35559562	35563811	Phvul.003G146200.1	-	PF09177		Syntaxin/t-SNARE family protein
Chr03	35570631	35578443	Phvul.003G146300.2	-	PF00856		SET domain-containing protein
Chr03	35608030	35609575	Phvul.003G146400.1	-	PF00004,PF14363		P-loop containing nucleoside triphosphate hydrolases superfamily protein
Chr03	35609855	35610155	Phvul.003G146450.1	+
Chr03	35629948	35634998	Phvul.003G146500.1	-	PF04893		Integral membrane Yip1 family protein
Chr03	35636493	35645175	Phvul.003G146600.1	-	PF01459	ATVDAC4,VDAC4	voltage dependent anion channel 4
Chr03	35656104	35657037	Phvul.003G146700.1	-	PF01762		Galactosyltransferase family protein
Chr03	35678986	35679373	Phvul.003G146800.1	-	PF05553
Chr03	35694120	35699156	Phvul.003G146900.1	+	PF13193,PF00501	4CL2,AT4CL2	4-coumarate:CoA ligase 2
Chr03	35707898	35712624	Phvul.003G147000.1	+	PF13193,PF00501	4CL2,AT4CL2	4-coumarate:CoA ligase 2
Chr03	35735121	35736440	Phvul.003G147100.1	+		ATZFP2,ZFP2	zinc finger protein 2
Chr03	35766624	35768173	Phvul.003G147200.1	-	PF04535		Uncharacterised protein family (UPF0497)
Chr03	35790232	35792087	Phvul.003G147300.1	-	PF06955,PF00722	XTH23,XTR6	xyloglucan endotransglycosylase 6
Chr03	35810778	35812087	Phvul.003G147400.1	+	PF06955,PF00722	XTH23,XTR6	xyloglucan endotransglycosylase 6
Chr03	35814240	35815402	Phvul.003G147500.1	+	PF06955,PF00722	XTH23,XTR6	xyloglucan endotransglycosylase 6
Chr03	35818409	35819779	Phvul.003G147600.1	-	PF06955,PF00722	TCH4,XTH22	Xyloglucan endotransglucosylase/hydrolase family protein
Chr03	35820558	35821773	Phvul.003G147700.1	+	PF06955,PF00722	TCH4,XTH22	Xyloglucan endotransglucosylase/hydrolase family protein
Chr03	35822892	35830867	Phvul.003G147800.1	-	PF07887		Calmodulin-binding protein
Chr03	35834470	35845431	Phvul.003G147900.1	-	PF13500,PF00202	BIO1	adenosylmethionine-8-amino-7-oxononanoate transaminases
Chr03	35848189	35865660	Phvul.003G148000.1	+	PF00370,PF02782		FGGY family of carbohydrate kinase
Chr03	35868919	35875687	Phvul.003G148100.1	+	PF00564,PF07714		Protein kinase superfamily protein with octicosapeptide/Phox/Bem1p domain
Chr03	35881877	35883897	Phvul.003G148200.1	+	PF00249	AtMYB36,MYB36	myb domain protein 36
Chr03	35890345	35892820	Phvul.003G148300.1	-	PF00201	UGT78D2	UDP-glucosyl transferase 78D2
Chr03	35903614	35904357	Phvul.003G148400.1	+	PF00188		CAP (Cysteine-rich secretory proteins, Antigen 5, and Pathogenesis-related 1 protein) superfamily protein
Chr03	35904793	35905807	Phvul.003G148500.1	-	PF13456
Chr03	35920870	35921760	Phvul.003G148550.1	-	PF00188		CAP (Cysteine-rich secretory proteins, Antigen 5, and Pathogenesis-related 1 protein) superfamily protein
Chr03	35928135	35932230	Phvul.003G148600.1	-	PF14531,PF03822	CIPK21,SnRK3.4	CBL-interacting protein kinase 21
Chr03	35953794	35959463	Phvul.003G148700.1	+			xylose isomerase family protein
Chr03	35969838	35976403	Phvul.003G148800.1	+	PF08477	ARF3,ARL1,ATARL1	ADP-ribosylation factor 3
Chr03	36000699	36004462	Phvul.003G148900.1	+	PF02780,PF02779,PF13292	CLA,CLA1,DEF,DXPS2,DXS	Deoxyxylulose-5-phosphate synthase
Chr03	36033164	36035185	Phvul.003G149000.1	+	PF00643,PF06203	ATCOL5,COL5	CONSTANS-like 5
Chr03	36096923	36100250	Phvul.003G149100.1	-	PF00582,PF00069		Protein kinase superfamily protein
Chr03	36117874	36119547	Phvul.003G149200.1	-	PF07714		Protein kinase superfamily protein
Chr03	36135922	36136417	Phvul.003G149300.1	-		ATGDU3,GDU3,LSB1	glutamine dumper 3
Chr03	36172193	36173770	Phvul.003G149400.1	-	PF01423		Small nuclear ribonucleoprotein family protein
Chr03	36183981	36185976	Phvul.003G149500.2	+	PF00060,PF00497	ATGLR2.5,GLR2.5	glutamate receptor 2.5
Chr03	36208897	36211057	Phvul.003G149600.1	+	PF00060,PF00497	ATGLR2.5,GLR2.5	glutamate receptor 2.5
Chr03	36225365	36227297	Phvul.003G149700.1	+	PF00060,PF00497	ATGLR2.5,GLR2.5	glutamate receptor 2.5
Chr03	36235243	36242122	Phvul.003G149800.1	-	PF00781,PF00609	ATDGK7,DGK7	diacylglycerol kinase 7
Chr03	36265239	36271892	Phvul.003G149900.1	-	PF01980
Chr03	36279411	36282858	Phvul.003G150000.3	+	PF13088		BNR/Asp-box repeat family protein
Chr03	30206262	30214070	Phvul.003G119000.1	-	PF00337,PF01762		Galactosyltransferase family protein
Chr03	30232649	30304668	Phvul.003G119100.1	-	PF00169,PF16909,PF06650,PF06101,PF12624,PF16910,PF16908		calcium-dependent lipid-binding family protein
Chr03	30316365	30328952	Phvul.003G119200.2	-	PF00145		S-adenosyl-L-methionine-dependent methyltransferases superfamily protein
Chr03	30337226	30342117	Phvul.003G119300.1	-	PF04146	ECT7	evolutionarily conserved C-terminal region 7
Chr03	30376607	30385825	Phvul.003G119400.1	-			ARM repeat superfamily protein
Chr03	30411535	30413057	Phvul.003G119500.1	+	PF14380,PF13947
Chr03	30428875	30430887	Phvul.003G119600.1	-	PF12776
Chr03	30436882	30449326	Phvul.003G119700.2	+	PF12711,PF00225	POK1	phragmoplast orienting kinesin 1
Chr03	30450034	30457896	Phvul.003G119800.1	-	PF01833,PF00612,PF03859		Calmodulin-binding transcription activator protein with CG-1 and Ankyrin domains
Chr03	30461500	30463681	Phvul.003G119900.1	+	PF00917		TRAF-like family protein
Chr03	30469980	30472370	Phvul.003G120000.1	+	PF00438,PF02772,PF02773	MAT4,MTO3,SAMS3	S-adenosylmethionine synthetase family protein
Chr03	30472885	30473808	Phvul.003G120100.1	+			Double Clp-N motif-containing P-loop nucleoside triphosphate hydrolases superfamily protein
Chr03	30490536	30492710	Phvul.003G120201.1	+	PF00438,PF02772,PF02773	AtSAM1,MAT1,SAM-1,SAM1	S-adenosylmethionine synthetase 1
Chr03	30495275	30497761	Phvul.003G120300.2	+	PF00438,PF02772,PF02773	AtSAM1,MAT1,SAM-1,SAM1	S-adenosylmethionine synthetase 1
Chr03	30519823	30529325	Phvul.003G120400.1	+	PF14510,PF08370,PF00005,PF01061	ABCG37,ATPDR9,PDR9,PIS1	pleiotropic drug resistance 9
Chr03	30531160	30540726	Phvul.003G120500.1	-	PF14510,PF08370,PF00005,PF01061	ABCG37,ATPDR9,PDR9,PIS1	pleiotropic drug resistance 9
Chr03	30538896	30539333	Phvul.003G120550.1	-			Protein kinase superfamily protein
Chr03	30544192	30546692	Phvul.003G120600.2	-	PF01535,PF13041	EMB2750	Tetratricopeptide repeat (TPR)-like superfamily protein
Chr03	30548629	30555522	Phvul.003G120700.1	-	PF03110	SPL12	squamosa promoter-binding protein-like 12
Chr03	30586480	30590753	Phvul.003G120800.1	+	PF07714		Protein kinase superfamily protein
Chr03	30592366	30593101	Phvul.003G120900.1	+	PF04398		Protein of unknown function, DUF538
Chr03	30595140	30599716	Phvul.003G121000.1	-	PF00069		Protein kinase superfamily protein
Chr03	30599326	30599546	Phvul.003G121100.1	+
Chr03	30620810	30625019	Phvul.003G121200.1	+	PF03151		Nucleotide-sugar transporter family protein
Chr03	30625720	30630371	Phvul.003G121300.1	-	PF03908	ATNPSN13,NPSN13	novel plant snare 13
Chr03	30639288	30641103	Phvul.003G121400.1	-	PF13812,PF12854,PF14432,PF01535,PF13041		Tetratricopeptide repeat (TPR)-like superfamily protein
Chr03	30651019	30654073	Phvul.003G121500.1	+	PF13499,PF13328,PF04607	ATCRSH,CRSH	Ca2+-activated RelA/spot homolog
Chr03	30655812	30660088	Phvul.003G121600.1	-	PF14531,PF03822	CIPK1,SnRK3.16	CBL-interacting protein kinase 1
Chr03	30657924	30659993	Phvul.003G121700.1	+
Chr03	30669762	30670818	Phvul.003G121800.1	+			vacuolar ATP synthase catalytic subunit-related / V-ATPase-related / vacuolar proton pump-related
Chr03	30677307	30679123	Phvul.003G121900.2	-		ATECP63,ECP63	embryonic cell protein 63
Chr03	30689287	30690838	Phvul.003G122000.1	+	PF00364		Single hybrid motif superfamily protein
Chr03	30709356	30711362	Phvul.003G122200.1	+	PF01416		Pseudouridine synthase family protein
Chr03	30712143	30719618	Phvul.003G122300.1	-	PF05761		HAD-superfamily hydrolase, subfamily IG, 5\'-nucleotidase
Chr03	30746207	30752050	Phvul.003G122400.1	+	PF00005,PF00664	PGP11	P-glycoprotein 11
Chr03	30755475	30761110	Phvul.003G122500.1	+	PF00005,PF00664	PGP11	P-glycoprotein 11
Chr03	30772911	30779319	Phvul.003G122600.1	+	PF00005,PF00664	ABCB4,ATPGP4,MDR4,PGP4	ATP binding cassette subfamily B4
Chr03	30787837	30793571	Phvul.003G122700.1	+	PF00005,PF00664	PGP11	P-glycoprotein 11
Chr03	30809565	30810777	Phvul.003G122800.1	+
Chr03	30823558	30831471	Phvul.003G122900.1	+			hydroxyproline-rich glycoprotein family protein
Chr03	30834161	30835784	Phvul.003G123000.1	+
Chr03	30836112	30846888	Phvul.003G123100.1	-	PF00271	CHA18,CHR18	chromatin remodeling factor18
Chr03	30848819	30849793	Phvul.003G123200.1	+
Chr03	30852527	30853487	Phvul.003G123250.1	+
Chr03	30853747	30856141	Phvul.003G123300.1	-	PF14497,PF02798	ATGSTU25,GSTU25	glutathione S-transferase TAU 25
Chr03	30865687	30867678	Phvul.003G123400.1	+	PF11976	UBQ10	polyubiquitin 10
Chr03	30876195	30877890	Phvul.003G123500.2	+	PF11976	UBQ10	polyubiquitin 10
Chr03	30901722	30903530	Phvul.003G123566.1	+	PF11976	UBQ4	ubiquitin 4
Chr03	30906476	30908209	Phvul.003G123632.1	+	PF11976	UBQ10	polyubiquitin 10
Chr03	30945612	30945969	Phvul.003G123700.1	+	PF05938		Plant self-incompatibility protein S1 family
Chr03	30947978	30959376	Phvul.003G123800.1	+	PF00646		F-box/RNI-like superfamily protein
Chr03	30976263	30978506	Phvul.003G123900.1	+	PF11976	UBQ10	polyubiquitin 10
Chr03	30984693	30988329	Phvul.003G124000.2	-	PF03106	AtWRKY42,WRKY42	WRKY family transcription factor
Chr03	31001907	31004411	Phvul.003G124100.1	-	PF00383		Cytidine/deoxycytidylate deaminase family protein
Chr03	31022289	31022986	Phvul.003G124200.1	+
Chr03	31028682	31029639	Phvul.003G124300.1	+
Chr03	31073802	31075024	Phvul.003G124400.1	+
Chr03	31098853	31103988	Phvul.003G124500.1	-	PF04855	BSH,CHE1	transcription regulatory protein SNF5, putative (BSH)
Chr03	31109344	31112376	Phvul.003G124600.1	-	PF02309	IAA31	indole-3-acetic acid inducible 31
Chr03	31123217	31130525	Phvul.003G124700.3	-	PF03283		Pectinacetylesterase family protein
Chr03	31135010	31137868	Phvul.003G124800.1	-	PF00854		Major facilitator superfamily protein
Chr03	31143542	31150973	Phvul.003G124900.1	-	PF01663		Alkaline-phosphatase-like family protein
Chr03	31152445	31156275	Phvul.003G125000.1	+	PF05184,PF03489,PF00026	APA1,ATAPA1	aspartic proteinase A1
Chr03	31158175	31161419	Phvul.003G125100.1	+	PF01694	ATRBL14,RBL14	RHOMBOID-like protein 14
Chr03	31168940	31169357	Phvul.003G125200.1	-	PF05938		Plant self-incompatibility protein S1 family
Chr03	31217187	31221666	Phvul.003G125300.1	+	PF00999	ATCHX19,CHX19	cation/H+ exchanger 19
Chr03	31241182	31244170	Phvul.003G125400.1	+	PF03647		Transmembrane proteins 14C
Chr03	31245799	31247567	Phvul.003G125501.1	+
Chr03	31255024	31257817	Phvul.003G125600.1	+	PF13883		Pyridoxamine 5\'-phosphate oxidase family protein
Chr03	31289824	31292864	Phvul.003G125700.1	-	PF06200,PF09425	JAZ12,TIFY3B	jasmonate-zim-domain protein 12
Chr03	31333034	31342026	Phvul.003G125800.1	+	PF01363,PF13857		Ankyrin repeat family protein
Chr03	31343287	31344165	Phvul.003G125900.1	+	PF13639		RING/U-box superfamily protein
Chr03	31357483	31372679	Phvul.003G126000.1	+	PF16206,PF16213,PF09324,PF12783,PF01369	ATMIN7,BEN1	HOPM interactor 7
Chr03	31374023	31376056	Phvul.003G126100.1	+	PF07983,PF00332		O-Glycosyl hydrolases family 17 protein
Chr03	31385334	31389643	Phvul.003G126200.1	+	PF06941		Haloacid dehalogenase-like hydrolase (HAD) superfamily protein
Chr03	31412089	31423633	Phvul.003G126300.1	-	PF03435,PF04455,PF05222,PF16653	LKR,LKR/SDH,SDH	lysine-ketoglutarate reductase/saccharopine dehydrogenase bifunctional enzyme
Chr03	31455868	31459435	Phvul.003G126500.1	+	PF04043,PF01095		Plant invertase/pectin methylesterase inhibitor superfamily
Chr03	31465313	31467427	Phvul.003G126600.1	+	PF04043,PF01095		Plant invertase/pectin methylesterase inhibitor superfamily
Chr03	31474085	31476476	Phvul.003G126700.1	+	PF04043,PF01095		Plant invertase/pectin methylesterase inhibitor superfamily
Chr03	31482579	31485154	Phvul.003G126800.1	+	PF14520,PF08423	ATRAD51,RAD51	RAS associated with diabetes protein 51
Chr03	31495842	31508227	Phvul.003G126900.1	+	PF04136		sec34-like family protein
Chr03	31508989	31520006	Phvul.003G127000.1	-	PF01363,PF00118,PF01504	FAB1B	phosphatidylinositol-4-phosphate 5-kinase family protein
Chr03	31522551	31525902	Phvul.003G127100.1	-	PF01363,PF04366		RING/FYVE/PHD-type zinc finger family protein
Chr03	31565212	31576509	Phvul.003G127200.1	+	PF02383		Phosphoinositide phosphatase family protein
Chr03	31579242	31582610	Phvul.003G127300.1	-	PF10075	ATTIF3K1,EIF3K,TIF3K1	eukaryotic translation initiation factor 3K
Chr03	31583915	31590609	Phvul.003G127400.1	-	PF11995,PF00225	ATNACK2,NACK2,TES	ATP binding microtubule motor family protein
Chr03	31631478	31636953	Phvul.003G127500.1	+	PF00534,PF00862	ATSUS4,SUS4	sucrose synthase 4
Chr03	31639796	31662634	Phvul.003G127600.1	-			alpha/beta-Hydrolases superfamily protein
Chr03	31765956	31766322	Phvul.003G127650.1	+	PF02519		SAUR-like auxin-responsive protein family
Chr03	31819886	31822677	Phvul.003G127700.1	+	PF01095		Pectin lyase-like superfamily protein
Chr03	31946347	31948232	Phvul.003G127801.1	-	PF02519		SAUR-like auxin-responsive protein family
Chr03	32000601	32004271	Phvul.003G127900.1	+	PF00111	ATMFDX2,MFDX2	MITOCHONDRIAL FERREDOXIN 2
Chr03	32005358	32006116	Phvul.003G128000.2	-
Chr03	32019381	32023073	Phvul.003G128133.1	+	PF00743	FMO1	flavin-dependent monooxygenase 1
Chr03	32023172	32025374	Phvul.003G128266.1	-	PF08534	ATPRX Q	Thioredoxin superfamily protein
Chr03	32072916	32073794	Phvul.003G128400.1	+
Chr03	32095404	32096228	Phvul.003G128500.1	+	PF04043		Plant invertase/pectin methylesterase inhibitor superfamily protein
Chr03	32105090	32118297	Phvul.003G128600.1	+	PF08161		ARM repeat superfamily protein
Chr03	32122035	32128069	Phvul.003G128700.1	-	PF02801,PF00109	ATKAS2,FAB1,KAS2	fatty acid biosynthesis 1
Chr03	32230626	32238415	Phvul.003G128800.1	+	PF02309,PF02362,PF06507	ARF11,ARF19,IAA22	auxin response factor 19
Chr03	32239075	32241615	Phvul.003G128900.1	-	PF00166	ATCPN21,CHCPN10,CPN10,CPN20,CPN21	chaperonin 20
Chr03	32280169	32281348	Phvul.003G129000.1	+	PF04570		Protein of unknown function (DUF581)
Chr03	32297999	32302513	Phvul.003G129100.1	-	PF00076	UBP1B	oligouridylate binding protein 1B
Chr03	32315119	32317361	Phvul.003G129200.1	-	PF09425,PF06200	JAZ1,TIFY10A	jasmonate-zim-domain protein 1
Chr03	32322093	32330360	Phvul.003G129300.1	-	PF12708		Pectin lyase-like superfamily protein
Chr03	32362268	32364947	Phvul.003G129400.1	+	PF08263,PF13855,PF00069		Leucine-rich repeat protein kinase family protein
Chr03	32402436	32405700	Phvul.003G129500.1	+	PF08511
Chr03	32407048	32408110	Phvul.003G129600.1	-	PF06172
Chr03	32438933	32444712	Phvul.003G129700.1	+	PF13676,PF00931		disease resistance protein (TIR-NBS-LRR class), putative
Chr03	32445834	32454024	Phvul.003G129800.1	-	PF13519		inter-alpha-trypsin inhibitor heavy chain-related
Chr03	32461627	32467909	Phvul.003G129900.1	-	PF14416,PF13839	TBL16	TRICHOME BIREFRINGENCE-LIKE 16
Chr03	32478983	32480185	Phvul.003G130000.1	+	PF07911		Protein of unknown function (DUF1677)
Chr03	32488370	32489572	Phvul.003G130100.1	-	PF04525		Protein of unknown function (DUF567)
Chr03	32532786	32535510	Phvul.003G130200.1	+	PF00631
Chr03	32536337	32539289	Phvul.003G130300.1	-	PF05922,PF02225,PF00082		Subtilase family protein
Chr03	32583063	32585768	Phvul.003G130400.1	-	PF07714		Protein kinase superfamily protein
Chr03	32622143	32632129	Phvul.003G130550.1	+	PF08246,PF00112		Cysteine proteinases superfamily protein
Chr03	32642713	32645299	Phvul.003G130700.2	+
Chr03	32653521	32654451	Phvul.003G130800.1	+
Chr03	32666813	32669820	Phvul.003G130900.1	+		ORG4	OBP3-responsive gene 4
Chr03	32670425	32671290	Phvul.003G131000.1	+			Putative membrane lipoprotein
Chr03	32677433	32679525	Phvul.003G131100.2	+	PF00583		Acyl-CoA N-acyltransferases (NAT) superfamily protein
Chr03	32683704	32687978	Phvul.003G131200.1	-
Chr03	32695034	32701356	Phvul.003G131300.2	+	PF10250		O-fucosyltransferase family protein
Chr03	32701969	32702958	Phvul.003G131400.1	-	PF07883	ATGER3,GER3,GLP3,GLP3A,GLP3B	germin 3
Chr03	32710053	32713225	Phvul.003G131500.1	-	PF00724	DDE1,OPR3	oxophytodienoate-reductase 3
Chr03	32741828	32745537	Phvul.003G131600.1	-	PF00724	DDE1,OPR3	oxophytodienoate-reductase 3
Chr03	32769340	32784167	Phvul.003G131700.1	+	PF03456,PF02141		DENN (AEX-3) domain-containing protein
Chr03	32788449	32791069	Phvul.003G131800.1	+	PF08880,PF08879	AtGRF5,GRF5	growth-regulating factor 5
Chr03	32812028	32814592	Phvul.003G131900.1	+	PF08612		TATA-binding related factor (TRF) of subunit 20 of Mediator complex
Chr03	32825353	32828360	Phvul.003G132000.1	+	PF05132		RNA polymerase III RPC4
Chr03	32847709	32849464	Phvul.003G132100.1	-	PF00249	ATMYB4,MYB4	myb domain protein 4
Chr03	32867667	32868834	Phvul.003G132200.1	-	PF07876		Stress responsive alpha-beta barrel domain protein
Chr03	32870563	32872024	Phvul.003G132300.1	-	PF00410	RPS15A	ribosomal protein S15A
Chr03	32902816	32904529	Phvul.003G132400.3	+	PF07011	ELF4-L4	ELF4-like 4
Chr03	32934741	32935459	Phvul.003G132500.1	-	PF06596	PSBX	photosystem II subunit X
Chr03	32938965	32939451	Phvul.003G132600.1	+	PF13639		RING/U-box superfamily protein
Chr03	32952564	32955417	Phvul.003G132700.1	-	PF03357	VPS2.1	SNF7 family protein
Chr03	32966575	32967903	Phvul.003G132800.1	-
Chr03	32974481	32980560	Phvul.003G132900.1	-	PF13713,PF08381	ATBRXL4,BRX-LIKE4,BRXL4	BREVIS RADIX-like 4
Chr03	32983806	32990058	Phvul.003G133000.1	+	PF02450	ATPDAT,PDAT,PDAT1	phospholipid:diacylglycerol acyltransferase
Chr03	32998538	33004236	Phvul.003G133100.1	+	PF02045	ATHAP2C,HAP2C,NF-YA3	nuclear factor Y, subunit A3
Chr03	33009316	33014098	Phvul.003G133200.1	+	PF12695	WAV2	alpha/beta-Hydrolases superfamily protein
Chr03	33015442	33019387	Phvul.003G133300.1	-	PF10358
Chr03	33020586	33024629	Phvul.003G133400.1	+	PF10998
Chr03	33030876	33046162	Phvul.003G133500.1	-	PF02736,PF00612,PF01843,PF00063	ATXIK,XI-17,XIK	Myosin family protein with Dil domain
Chr03	33052279	33053220	Phvul.003G133600.1	+	PF00501	OPCL1	OPC-8:0 CoA ligase1
Chr03	33064008	33066169	Phvul.003G133700.1	+	PF00291	MTO2,TS	Pyridoxal-5\'-phosphate-dependent enzyme family protein
Chr03	33066897	33070518	Phvul.003G133800.1	-	PF00400	VIP3	Transducin/WD40 repeat-like superfamily protein
Chr03	33075194	33078741	Phvul.003G133900.1	+	PF12874,PF08790		zinc ion binding
Chr03	33080107	33085121	Phvul.003G134000.1	-			Ribosomal protein L18ae family
Chr03	33110598	33115324	Phvul.003G134100.1	+	PF14531	ATMKK2,MK1,MKK2	MAP kinase kinase 2
Chr03	33115470	33119296	Phvul.003G134200.1	-	PF00481	HAB1	homology to ABI1
Chr03	33124109	33136680	Phvul.003G134300.1	-
Chr03	33173401	33176297	Phvul.003G134400.1	+	PF00903		Lactoylglutathione lyase / glyoxalase I family protein
Chr03	33176813	33182116	Phvul.003G134500.1	-	PF04564,PF07714		U-box domain-containing protein kinase family protein
Chr03	33195897	33197878	Phvul.003G134600.1	+	PF00141		Peroxidase superfamily protein
Chr03	33199045	33212784	Phvul.003G134700.1	+	PF00400	AtTHO6,DWA1,THO6	DWD (DDB1-binding WD40 protein) hypersensitive to ABA 1
Chr03	33224230	33227134	Phvul.003G134800.1	+	PF04851,PF00271	EIF4A1,RH4,TIF4A1	eukaryotic translation initiation factor 4A1
Chr03	33231033	33240427	Phvul.003G134900.1	+	PF03062	ABX45,AS11,ATDGAT,DGAT1,RDS1,TAG1	membrane bound O-acyl transferase (MBOAT) family protein
Chr03	33242778	33244189	Phvul.003G135000.1	+	PF12023		Protein of unknown function (DUF3511)
Chr03	33248287	33254330	Phvul.003G135100.1	-	PF00069	CK1,CKL1	casein kinase 1
Chr03	33268162	33270485	Phvul.003G135200.1	-	PF00447	ATHSFA2,HSFA2	heat shock transcription factor A2
Chr03	33291281	33293631	Phvul.003G135400.1	-	PF00447	ATHSFA2,HSFA2	heat shock transcription factor A2
Chr03	33309320	33312409	Phvul.003G135500.1	-	PF00956	NAP1;2,NFA02,NFA2	nucleosome assembly protein 1;2
Chr03	33315528	33325255	Phvul.003G135600.1	+	PF00154		recA DNA recombination family protein
Chr03	33336374	33338910	Phvul.003G135700.1	-	PF00010		basic helix-loop-helix (bHLH) DNA-binding family protein
Chr03	33345544	33351681	Phvul.003G135800.2	+	PF12695		alpha/beta-Hydrolases superfamily protein
Chr03	33353350	33358550	Phvul.003G135900.1	+	PF12695		alpha/beta-Hydrolases superfamily protein
Chr03	33360173	33378931	Phvul.003G136000.2	+	PF12695		alpha/beta-Hydrolases superfamily protein
Chr03	33381106	33385772	Phvul.003G136200.1	+	PF12695		alpha/beta-Hydrolases superfamily protein
Chr03	33386360	33392171	Phvul.003G136300.1	-	PF01985		CRS1 / YhbY (CRM) domain-containing protein
Chr03	33414754	33418670	Phvul.003G136400.1	+	PF01565,PF09265	ATCKX3,CKX3	cytokinin oxidase 3
Chr03	33430414	33436042	Phvul.003G136500.1	-	PF01565,PF09265	ATCKX3,CKX3	cytokinin oxidase 3
Chr03	33443346	33444679	Phvul.003G136600.1	-	PF14364,PF05553
Chr03	33476589	33482821	Phvul.003G136700.1	+	PF04676,PF04677		CwfJ-like family protein / zinc finger (CCCH-type) family protein
Chr03	33485774	33487936	Phvul.003G136800.1	+	PF05251
Chr03	33494704	33496793	Phvul.003G136900.1	+	PF13450	ATPAO5,PAO5	polyamine oxidase 5
Chr03	33513591	33519221	Phvul.003G137000.1	-	PF02140,PF01301	BGAL1	beta galactosidase 1
Chr03	33532983	33534830	Phvul.003G137100.1	+	PF00320	GATA21,GNC	GATA type zinc finger transcription factor family protein
Chr03	33537060	33540044	Phvul.003G137200.1	+
Chr03	33563819	33569374	Phvul.003G137300.2	-	PF01399	EER5	proteasome family protein
Chr03	33570918	33571448	Phvul.003G137400.1	-
Chr03	33574373	33577037	Phvul.003G137466.1	+	PF04231
Chr03	33582482	33587112	Phvul.003G137532.1	-
Chr03	33592133	33593688	Phvul.003G137600.1	-	PF06955,PF00722	XTH23,XTR6	xyloglucan endotransglycosylase 6
Chr03	33604317	33607488	Phvul.003G137700.1	+	PF07714		Leucine-rich repeat transmembrane protein kinase
Chr03	33610872	33611130	Phvul.003G137800.1	-
Chr03	33623835	33624190	Phvul.003G137900.1	-		LCR5	low-molecular-weight cysteine-rich 5
Chr03	33629006	33629361	Phvul.003G138000.1	-		LCR5	low-molecular-weight cysteine-rich 5
Chr03	33642228	33646870	Phvul.003G138100.1	+	PF14416,PF13839	TBL5	TRICHOME BIREFRINGENCE-LIKE 5
Chr03	33683806	33685174	Phvul.003G139325.1	-	PF02458	SHT	spermidine hydroxycinnamoyl transferase
Chr03	33691589	33692957	Phvul.003G140550.1	-	PF02458	SHT	spermidine hydroxycinnamoyl transferase
Chr03	33699453	33702334	Phvul.003G141775.1	+	PF08241,PF12589		S-adenosyl-L-methionine-dependent methyltransferases superfamily protein
Chr03	33706414	33720553	Phvul.003G143000.2	-	PF00806	APUM5,PUM5	pumilio 5
Chr03	33721632	33725494	Phvul.003G142900.1	+			metaxin-related
Chr03	33727392	33732072	Phvul.003G142800.1	-	PF04783,PF04782		Protein of unknown function (DUF630 and DUF632)
Chr03	33789251	33798804	Phvul.003G142700.1	+	PF00702,PF00122	ATHMA2,HMA2	heavy metal atpase 2
Chr03	33808484	33812078	Phvul.003G142726.1	-	PF01814	BTS,EMB2454	zinc finger protein-related
Chr03	33854777	33855165	Phvul.003G142600.1	-

## Sheet: ALS10.1
Chrm	Start	End	transcriptName	Sense	Pfam	arabi-symbol	arabi-defline
Chr10	20801324	20806745	Phvul.010G078500.1	+	PF00515	ATEOL1,ETO1	tetratricopeptide repeat (TPR)-containing protein
Chr10	20871743	20875269	Phvul.010G067200.1	+	PF00155	ASP1	aspartate aminotransferase 1
Chr10	20876661	20877831	Phvul.010G067300.1	-
Chr10	20955663	20958848	Phvul.010G067400.1	+	PF05701		Plant protein of unknown function (DUF827)
Chr10	20960508	20969567	Phvul.010G067500.2	+	PF03489		saposin B domain-containing protein
Chr10	20990609	20994291	Phvul.010G067600.1	+	PF14531,PF03822	CIPK10,PKS2,SIP1,SNRK3.8	SOS3-interacting protein 1
Chr10	21144107	21145832	Phvul.010G078400.1	-	PF00249		myb-like HTH transcriptional regulator family protein
Chr10	21656464	21657067	Phvul.010G073400.1	-	PF00010	APTX	APRATAXIN-like

## Sheet: ALS11.1
Chrm	Start	End	transcriptName	Sense	Pfam	arabi-symbol	arabi-defline
Chr11	1099775	1103695	Phvul.011G014100.1	-	PF00612,PF13178	IQD11	IQ-domain 11
Chr11	1106473	1109471	Phvul.011G014200.2	-	PF00931	RPP13	NB-ARC domain-containing disease resistance protein
Chr11	1129546	1132371	Phvul.011G014301.1	-	PF00931	RPP13	NB-ARC domain-containing disease resistance protein
Chr11	1142009	1144947	Phvul.011G014400.1	-	PF00931	RPP13	NB-ARC domain-containing disease resistance protein
Chr11	1148573	1149437	Phvul.011G014450.1	-		HRT,RCY1,RPP8	Disease resistance protein (CC-NBS-LRR class) family
Chr11	1149479	1151453	Phvul.011G014500.2	-	PF00931	RPP13	NB-ARC domain-containing disease resistance protein
Chr11	1154986	1160262	Phvul.011G014600.1	+	PF13423	UBP24	ubiquitin-specific protease 24
Chr11	1162786	1164046	Phvul.011G014700.1	-	PF00400		Transducin/WD40 repeat-like superfamily protein
Chr11	1170719	1178217	Phvul.011G014800.1	-	PF14008,PF16656,PF00149	ATPAP24,PAP24	purple acid phosphatase 24
Chr11	1180596	1185622	Phvul.011G014900.1	-	PF16656,PF14008,PF00149	ATPAP27,PAP27	purple acid phosphatase 27
Chr11	1192506	1193757	Phvul.011G015000.1	+	PF03514	SCL-3,SCL3	scarecrow-like 3
Chr11	1198221	1201346	Phvul.011G015100.1	+	PF00295	QRT2	Pectin lyase-like superfamily protein
Chr11	1202131	1204327	Phvul.011G015200.1	-	PF00230	TIP5;1	tonoplast intrinsic protein 5;1
Chr11	1205296	1211046	Phvul.011G015300.1	-	PF01926	ATNOA1,ATNOS1,NOA1,NOS1,RIF1	P-loop containing nucleoside triphosphate hydrolases superfamily protein
Chr11	1211913	1212129	Phvul.011G015400.1	-
Chr11	1214538	1214742	Phvul.011G015500.1	-
Chr11	1216340	1221251	Phvul.011G015600.1	-	PF04749		PLAC8 family protein
Chr11	1231009	1241793	Phvul.011G015700.1	-	PF01336,PF00152	ATKRS-2,OVA5	Lysyl-tRNA synthetase, class II
Chr11	1246041	1246719	Phvul.011G015800.1	-	PF05648	PEX11B	peroxin 11B
Chr11	1247887	1250560	Phvul.011G015900.1	+	PF03194		LUC7 N_terminus domain-containing protein
Chr11	1254474	1260086	Phvul.011G016000.1	-	PF10191	EYE	conserved oligomeric Golgi complex component-related / COG complex component-related
Chr11	1263507	1264452	Phvul.011G016100.2	+	PF00011	ATHSP23.6-MITO,HSP23.6-MITO	mitochondrion-localized small heat shock protein 23.6
Chr11	1265555	1266582	Phvul.011G016200.1	+	PF00011	ATHSP23.6-MITO,HSP23.6-MITO	mitochondrion-localized small heat shock protein 23.6
Chr11	1274430	1277475	Phvul.011G016300.1	+	PF00083	ATPS3,PS3	phosphate starvation-induced gene 3
Chr11	1284805	1289452	Phvul.011G016400.1	+	PF04545,PF04542,PF04539	RPOD1,SIG1,SIG2,SIGA,SIGB	sigma factor A
Chr11	1296966	1301088	Phvul.011G016500.1	+		MEX1,RCP1	root cap 1 (RCP1)
Chr11	1305048	1313482	Phvul.011G016600.1	+	PF14370,PF01028,PF02919	TOP1,TOP1BETA	DNA topoisomerase 1 beta
Chr11	1315323	1317026	Phvul.011G016700.1	+	PF00067	CYP89A6	cytochrome P450, family 87, subfamily A, polypeptide 6
Chr11	1317313	1320809	Phvul.011G016800.1	-	PF00561		esterase/lipase/thioesterase family protein
Chr11	1322364	1327478	Phvul.011G016900.1	+	PF15249
Chr11	1330525	1333590	Phvul.011G017000.1	-
Chr11	1339157	1343351	Phvul.011G017100.1	-	PF08241	G-TMT,TMT1,VTE4	gamma-tocopherol methyltransferase
Chr11	1348031	1351168	Phvul.011G017200.1	-	PF08241	G-TMT,TMT1,VTE4	gamma-tocopherol methyltransferase
Chr11	1361569	1362778	Phvul.011G017300.1	-			Nucleotide-diphospho-sugar transferases superfamily protein
Chr11	1364124	1366778	Phvul.011G017400.1	+
Chr11	1370274	1379888	Phvul.011G017500.2	-	PF07034	ATORC3,ORC3	origin recognition complex subunit 3
Chr11	1381276	1390114	Phvul.011G017600.2	-	PF01535,PF13041	EMB2279,EMB88	pentatricopeptide (PPR) repeat-containing protein
Chr11	1404010	1407792	Phvul.011G017700.1	+	PF08880,PF08879	AtGRF5,GRF5	growth-regulating factor 5
Chr11	1409635	1418241	Phvul.011G017800.1	+	PF12537,PF12430	GTG2	GPCR-type G protein 2
Chr11	1422788	1432498	Phvul.011G017900.1	-			RING/FYVE/PHD zinc finger superfamily protein
Chr11	1438869	1441943	Phvul.011G018000.1	-	PF00107,PF08240		GroES-like zinc-binding dehydrogenase family protein
Chr11	1449501	1453486	Phvul.011G018100.1	+	PF00226		Chaperone DnaJ-domain superfamily protein
Chr11	1456691	1457868	Phvul.011G018200.1	-	PF06094		AIG2-like (avirulence induced gene) family protein
Chr11	1462891	1466422	Phvul.011G018300.1	+	PF01145	ATPHB2,PHB2	prohibitin 2
Chr11	1467835	1470060	Phvul.011G018400.1	+
Chr11	1474882	1477344	Phvul.011G018500.1	+	PF04640		PLATZ transcription factor family protein
Chr11	1485082	1489721	Phvul.011G018600.1	+	PF00642		Zinc finger C-x8-C-x5-C-x3-H type family protein
Chr11	1490216	1493973	Phvul.011G018700.1	-	PF00294	NARA5	pfkB-like carbohydrate kinase family protein
Chr11	1494882	1500587	Phvul.011G018800.1	+	PF08045	ISI1	binding
Chr11	1501621	1504641	Phvul.011G018900.1	+
Chr11	1506479	1509324	Phvul.011G019000.1	+
Chr11	1516055	1520087	Phvul.011G019100.1	+			Plant protein of unknown function (DUF827)
Chr11	1524184	1525700	Phvul.011G019200.1	-	PF00249	AtMYB9,MYB9	myb domain protein 9
Chr11	1538005	1539273	Phvul.011G019300.1	-	PF00407		Polyketide cyclase/dehydrase and lipid transport superfamily protein
Chr11	1542686	1545888	Phvul.011G019400.1	+	PF00999	ATCHX19,CHX19	cation/H+ exchanger 19
Chr11	1546841	1548335	Phvul.011G019500.1	+
Chr11	1551209	1554168	Phvul.011G019600.2	+	PF00076		RNA-binding (RRM/RBD/RNP motifs) family protein
Chr11	1554429	1557742	Phvul.011G019700.1	-	PF02466	MEE67	Mitochondrial import inner membrane translocase subunit Tim17/Tim22/Tim23 family protein
Chr11	1560749	1563207	Phvul.011G019800.1	+	PF03127,PF00790		Target of Myb protein 1
Chr11	1564114	1569182	Phvul.011G019900.1	+	PF03016		Exostosin family protein
Chr11	1569626	1570190	Phvul.011G020000.1	-
Chr11	1572073	1577347	Phvul.011G020100.1	+	PF13632,PF14570	ATCSLD3,CSLD3,KJK	cellulose synthase-like D3
Chr11	1580718	1583582	Phvul.011G020200.1	+	PF13193,PF00501	4CL3	4-coumarate:CoA ligase 3
Chr11	1584049	1586928	Phvul.011G020300.1	-	PF10276		NADH-ubiquinone oxidoreductase-related
Chr11	1588048	1589985	Phvul.011G020400.1	+	PF00581		Rhodanese/Cell cycle control phosphatase superfamily protein
Chr11	1591875	1595104	Phvul.011G020500.2	-	PF02319,PF08781	ATDPB,DPB	Transcription factor DP
Chr11	1603626	1606026	Phvul.011G020600.1	+	PF03514		GRAS family transcription factor
Chr11	1609289	1620804	Phvul.011G020700.1	-	PF00083		Major facilitator superfamily protein
Chr11	1625676	1632844	Phvul.011G020800.1	+	PF01588,PF09334		methionine--tRNA ligase, putative / methionyl-tRNA synthetase, putative / MetRS, putative
Chr11	1635055	1646622	Phvul.011G020900.1	+	PF03810,PF08389,PF08767	ATCRM1,ATXPO1,HIT2,XPO1,XPO1A	exportin 1A
Chr11	1648626	1652090	Phvul.011G021000.1	+	PF08477	ARFB1C,ATARFB1C	ADP-ribosylation factor B1C
Chr11	1653330	1655544	Phvul.011G021100.1	-	PF06101		Plant protein of unknown function (DUF946)
Chr11	1656878	1662287	Phvul.011G021200.1	-	PF09184
Chr11	1664458	1667742	Phvul.011G021300.1	-
Chr11	1670001	1673720	Phvul.011G021400.1	-	PF00855		Tudor/PWWP/MBT superfamily protein
Chr11	1677523	1682617	Phvul.011G021500.1	+	PF03803		scramblase-related
Chr11	1683395	1686533	Phvul.011G021600.1	-	PF06749		Protein of unknown function (DUF1218)
Chr11	1688360	1690814	Phvul.011G021700.2	-	PF05348		Proteasome maturation factor UMP1
Chr11	1693590	1698964	Phvul.011G021750.1	-	PF06432	SETH1	phosphatidylinositolglycan synthase family protein
Chr11	1703030	1707300	Phvul.011G021800.1	+	PF03460,PF01077	SIR	sulfite reductase
Chr11	1718511	1721931	Phvul.011G021900.1	+			myosin-related
Chr11	1728143	1730160	Phvul.011G022000.2	+	PF06432	SETH1	phosphatidylinositolglycan synthase family protein
Chr11	1731042	1738509	Phvul.011G022100.1	-	PF01370		NAD(P)-binding Rossmann-fold superfamily protein
Chr11	1739319	1745520	Phvul.011G022200.1	-	PF01370		NAD(P)-binding Rossmann-fold superfamily protein
Chr11	1746491	1749068	Phvul.011G022300.1	-	PF01370		NAD(P)-binding Rossmann-fold superfamily protein
Chr11	1753188	1756535	Phvul.011G022400.1	-	PF01370		NAD(P)-binding Rossmann-fold superfamily protein
Chr11	1762655	1765193	Phvul.011G022500.1	+	PF01764		alpha/beta-Hydrolases superfamily protein
Chr11	1778778	1782061	Phvul.011G022600.1	+	PF11891		Protein of unknown function (DUF3411)
Chr11	1784594	1792960	Phvul.011G022700.1	-	PF01513	ATNADK-1,NADK1	NAD kinase 1
Chr11	1798895	1804519	Phvul.011G022800.1	+	PF00622	TRO	TRAUCO
Chr11	1804050	1809839	Phvul.011G022900.2	-	PF00005,PF01061		ABC-2 type transporter family protein
Chr11	1816630	1824493	Phvul.011G023000.1	-	PF00005,PF01061		ABC-2 type transporter family protein
Chr11	1832597	1838831	Phvul.011G023100.1	-	PF00005,PF01061		ABC-2 type transporter family protein
Chr11	1844032	1849146	Phvul.011G023200.1	-
Chr11	1850268	1854251	Phvul.011G023300.1	+	PF04055,PF06968	BIO2,BIOB	Radical SAM superfamily protein
Chr11	1855449	1872924	Phvul.011G023400.2	-	PF08264,PF00133		tRNA synthetase class I (I, L, M and V) family protein
Chr11	1881051	1893891	Phvul.011G049550.1	-	PF00380		Ribosomal protein S5 domain 2-like superfamily protein
Chr11	1891622	1892553	Phvul.011G075700.1	+
Chr11	1915911	1916679	Phvul.011G075800.1	+
Chr11	1916813	1922776	Phvul.011G075900.1	-	PF02449,PF02140	BGAL8	beta-galactosidase 8
Chr11	1925789	1926668	Phvul.011G076000.1	-	PF02469	FLA12	FASCICLIN-like arabinogalactan-protein 12
Chr11	1927571	1942553	Phvul.011G076150.1	-	PF03914,PF07540		binding
Chr11	1944063	1947153	Phvul.011G076300.1	-	PF00380		Ribosomal protein S5 domain 2-like superfamily protein
Chr11	1967017	1970127	Phvul.011G076400.1	-	PF09736
Chr11	1972715	1975163	Phvul.011G076500.1	+	PF13671	DRL1	calmodulin binding;purine nucleotide binding
Chr11	1986108	1987524	Phvul.011G076600.1	+	PF04135	EDA27,NOP10	nucleolar RNA-binding Nop10p family protein
Chr11	2009605	2013901	Phvul.011G076700.2	-
Chr11	2023113	2027905	Phvul.011G077301.1	+	PF04427		Ribosomal RNA processing Brix domain protein
Chr11	2033364	2035230	Phvul.011G023500.1	-
Chr11	2054820	2056918	Phvul.011G023600.1	+
Chr11	2070443	2072373	Phvul.011G077900.1	-	PF00332		Glycosyl hydrolase superfamily protein
Chr11	2077325	2087139	Phvul.011G078000.1	+	PF00226,PF13414		Heat shock protein DnaJ with tetratricopeptide repeat
Chr11	2087869	2094309	Phvul.011G078100.1	-	PF03435		Saccharopine dehydrogenase
Chr11	2096040	2103517	Phvul.011G078200.1	-	PF02883,PF09066,PF01602		Adaptin family protein
Chr11	2110284	2115063	Phvul.011G023700.1	+	PF00349,PF03727	ATHKL1,HKL1	hexokinase-like 1
Chr11	2116367	2118119	Phvul.011G023800.1	-	PF05773	UBC19	ubiquitin-conjugating enzyme19
Chr11	2120017	2135556	Phvul.011G023900.1	-	PF00628,PF02791		DNA binding;zinc ion binding;DNA binding
Chr11	2144507	2146192	Phvul.011G024000.1	+	PF14368		Bifunctional inhibitor/lipid-transfer protein/seed storage 2S albumin superfamily protein
Chr11	2150491	2153192	Phvul.011G024100.1	-	PF03514	SCL-3,SCL3	scarecrow-like 3
Chr11	2156130	2164396	Phvul.011G024200.3	-	PF01529		DHHC-type zinc finger family protein
Chr11	2170806	2178624	Phvul.011G024300.1	+	PF00202	GABA-T,HER1,POP2	Pyridoxal phosphate (PLP)-dependent transferases superfamily protein
Chr11	2180428	2181221	Phvul.011G024400.1	-
Chr11	2193894	2204261	Phvul.011G024500.1	+
Chr11	2209284	2211538	Phvul.011G024600.2	+	PF03514		GRAS family transcription factor
Chr11	2219135	2221184	Phvul.011G024700.1	-	PF02365	anac036,NAC036	NAC domain containing protein 36
Chr11	2237180	2238984	Phvul.011G024801.1	-	PF03330,PF01357	ATEXLA1,ATEXPL1,ATHEXP BETA 2.1,EXLA1,EXPL1	expansin-like A1
Chr11	2256235	2257085	Phvul.011G024900.1	+	PF02519		SAUR-like auxin-responsive protein family
Chr11	2258487	2258940	Phvul.011G025000.1	+	PF02519		SAUR-like auxin-responsive protein family
Chr11	2266339	2270263	Phvul.011G025100.1	+	PF01490		Transmembrane amino acid transporter family protein
Chr11	2274532	2276646	Phvul.011G025200.1	-	PF03168
Chr11	2281153	2282878	Phvul.011G025300.1	-	PF13857,PF00385	CAO,CPSRP43	chloroplast signal recognition particle component (CAO)
Chr11	2284668	2288831	Phvul.011G025400.1	+	PF07731,PF07732,PF00394	sks5	SKU5 similar 5
Chr11	2290763	2294531	Phvul.011G025500.1	+	PF03759	ATROPGEF1,ROPGEF1	rho guanyl-nucleotide exchange factor 1
Chr11	2297023	2300860	Phvul.011G025600.1	+			Calcium-binding EF-hand family protein
Chr11	2301183	2302770	Phvul.011G025700.1	-	PF00230	ATPIP1,PIP1,PIP1;1,PIP1A	plasma membrane intrinsic protein 1A
Chr11	2303036	2303879	Phvul.011G025800.1	-	PF00230	ATPIP1,PIP1,PIP1;1,PIP1A	plasma membrane intrinsic protein 1A
Chr11	2305612	2306772	Phvul.011G025900.1	-			alpha 1,4-glycosyltransferase family protein
Chr11	2309271	2310901	Phvul.011G026000.1	+	PF08545	LAP5	Chalcone and stilbene synthase family protein
Chr11	2311486	2314699	Phvul.011G026100.1	-	PF00810		ER lumen protein retaining receptor family protein
Chr11	2318289	2320620	Phvul.011G026200.1	+
Chr11	2320707	2320875	Phvul.011G026301.1	+
Chr11	2321588	2322254	Phvul.011G026400.1	-
Chr11	2323817	2326726	Phvul.011G026500.1	-	PF00010	bHLH121	basic helix-loop-helix (bHLH) DNA-binding superfamily protein
Chr11	2329134	2332911	Phvul.011G026600.1	+	PF03896		Translocon-associated protein (TRAP), alpha subunit
Chr11	2336195	2338186	Phvul.011G026700.1	+	PF01190	ATPRP2,PRP2	proline-rich protein 2
Chr11	2340370	2366121	Phvul.011G026800.1	+			Protein of unknown function (DUF3414)
Chr11	2368490	2370033	Phvul.011G026900.1	+	PF00160	ROC3	rotamase CYP 3
Chr11	2376883	2380972	Phvul.011G027100.1	+	PF01981		Peptidyl-tRNA hydrolase II (PTH2) family protein
Chr11	2382712	2385415	Phvul.011G027200.1	-	PF01535,PF13041		Pentatricopeptide repeat (PPR) superfamily protein
Chr11	2388137	2390899	Phvul.011G027300.1	+	PF03587		nucleolar essential protein-related
Chr11	2391805	2394982	Phvul.011G027400.1	+	PF00179,PF09454	ELC-Like	ELCH-like
Chr11	2396666	2405233	Phvul.011G027550.1	+	PF02636		Protein of unknown function (DUF185)
Chr11	2405775	2406882	Phvul.011G027700.1	-	PF16320,PF00542	RPL12-C	ribosomal protein L12-C
Chr11	2408297	2410817	Phvul.011G027800.1	-
Chr11	2412259	2415315	Phvul.011G027900.1	-	PF00450	SCPL34	serine carboxypeptidase-like 34
Chr11	2418639	2425953	Phvul.011G028000.1	-	PF00450	SCPL34	serine carboxypeptidase-like 34
Chr11	2431487	2435055	Phvul.011G028100.1	-	PF00098,PF07962		zinc knuckle (CCHC-type) family protein
Chr11	2459238	2468846	Phvul.011G028200.1	+	PF00450	scpl35	serine carboxypeptidase-like 35
Chr11	2469902	2471108	Phvul.011G028300.1	-			transducin family protein / WD-40 repeat family protein
Chr11	2477307	2481289	Phvul.011G028400.1	+			transducin family protein / WD-40 repeat family protein
Chr11	2516946	2520914	Phvul.011G028501.1	-			transducin family protein / WD-40 repeat family protein
Chr11	2532673	2535070	Phvul.011G028600.1	-	PF00450	scpl35	serine carboxypeptidase-like 35
Chr11	2581204	2581600	Phvul.011G028701.1	-
Chr11	2612120	2615929	Phvul.011G028800.1	-		FLOR1,FLR1	Leucine-rich repeat (LRR) family protein
Chr11	2646770	2649514	Phvul.011G028900.1	+	PF01966		Metal-dependent phosphohydrolase
Chr11	2649842	2652382	Phvul.011G029000.1	-	PF00067	CYP86B1	cytochrome P450, family 86, subfamily B, polypeptide 1
Chr11	2661569	2665626	Phvul.011G029100.2	-		EMB2780	DNA binding;nucleotide binding;nucleic acid binding;DNA-directed DNA polymerases;DNA-directed DNA polymerases
Chr11	2667579	2668571	Phvul.011G029200.1	+
Chr11	2672972	2674838	Phvul.011G029300.1	+	PF00574	CLPP2,NCLPP7	nuclear-encoded CLP protease P7
Chr11	2679945	2699035	Phvul.011G029450.1	+	PF04818,PF00855		Tudor/PWWP/MBT domain-containing protein
Chr11	2698478	2699983	Phvul.011G029600.1	-
Chr11	2701707	2704840	Phvul.011G029700.1	-	PF04427	PPAN	PETER PAN-like protein
Chr11	2706755	2711360	Phvul.011G029800.1	-	PF14870	HCF136	photosystem II stability/assembly factor, chloroplast (HCF136)
Chr11	2712972	2716034	Phvul.011G029900.1	+	PF12796,PF13962		Ankyrin repeat family protein
Chr11	2721517	2726069	Phvul.011G030000.1	+	PF13191,PF13676		disease resistance protein (TIR-NBS-LRR class), putative
Chr11	2726358	2727729	Phvul.011G030100.1	-	PF00141		Peroxidase superfamily protein
Chr11	2731333	2733037	Phvul.011G030200.1	+	PF00141		Peroxidase superfamily protein
Chr11	2736071	2741059	Phvul.011G030300.1	+	PF09478,PF00759	AtGH9C1,GH9C1	glycosyl hydrolase 9C1
Chr11	2741075	2746179	Phvul.011G030400.4	-	PF13561	ENR1,MOD1	NAD(P)-binding Rossmann-fold superfamily protein
Chr11	2749108	2751491	Phvul.011G030500.3	+
Chr11	2774105	2779077	Phvul.011G030600.1	+	PF00076	ATNUC-L2,NUC-L2,PARLL1	nucleolin like 2
Chr11	2781547	2803857	Phvul.011G030700.1	+	PF05496		P-loop containing nucleoside triphosphate hydrolases superfamily protein
Chr11	2804605	2822845	Phvul.011G030800.2	-	PF00069	MAP3KE1,MAPKKK7	mitogen-activated protein kinase kinase kinase 7
Chr11	2823662	2827762	Phvul.011G030900.1	-	PF01926		P-loop containing nucleoside triphosphate hydrolases superfamily protein
Chr11	2851145	2862595	Phvul.011G031000.1	-	PF00515,PF07719,PF13181,PF14559		tetratricopeptide repeat (TPR)-containing protein
Chr11	2875197	2886544	Phvul.011G031100.1	-	PF02272,PF07973,PF01411	ACD,ALATS	Alanyl-tRNA synthetase
Chr11	2890675	2898832	Phvul.011G031200.1	+	PF02622
Chr11	2899148	2902033	Phvul.011G031300.1	+	PF02620		Protein of unknown function (DUF177)
Chr11	2902627	2904358	Phvul.011G031400.2	-	PF05207,PF00226		DNAJ heat shock N-terminal domain-containing protein
Chr11	2905444	2919026	Phvul.011G031500.1	-	PF00397,PF01846	ATPRP40C,PRP40C	pre-mRNA-processing protein 40C
Chr11	2922486	2931138	Phvul.011G031600.1	-	PF00168	NTMC2T5.2,NTMC2TYPE5.2	Calcium-dependent lipid-binding (CaLB domain) family protein
Chr11	2934283	2937389	Phvul.011G031700.1	-	PF01565	CBB1,DIM,DIM1,DWF1,EVE1	cell elongation protein / DWARF1 / DIMINUTO (DIM)
Chr11	2943444	2947201	Phvul.011G031800.1	-	PF03167	ATUNG,UNG	uracil dna glycosylase
Chr11	2948621	2950753	Phvul.011G031900.1	-	PF01248		Ribosomal protein L7Ae/L30e/S12e/Gadd45 family protein
Chr11	2955447	2959410	Phvul.011G032000.1	-	PF13639		RING/U-box superfamily protein
Chr11	2961158	2966781	Phvul.011G032100.1	-	PF00076,PF00641	TAF15	TBP-associated factor 15
Chr11	2971748	2981831	Phvul.011G032200.1	+			RING/U-box superfamily protein
Chr11	2982197	2985903	Phvul.011G032300.1	-	PF11267
Chr11	2987585	2992377	Phvul.011G032400.1	+		ATXRCC2,XRCC2	homolog of X-ray repair cross complementing 2 (XRCC2)
Chr11	2993292	2996615	Phvul.011G032500.1	-	PF03000		Phototropic-responsive NPH3 family protein
Chr11	3004904	3015424	Phvul.011G032600.1	+	PF12796,PF00169,PF03114,PF01412	AGD2	ARF-GAP domain 2
Chr11	3016630	3018508	Phvul.011G032700.1	+
Chr11	3019418	3022697	Phvul.011G032800.1	-	PF14226,PF03171	ATGA2OX8,GA2OX8	gibberellin 2-oxidase 8
Chr11	3027863	3034763	Phvul.011G032900.1	-	PF12579		Protein of unknown function (DUF3755)
Chr11	3041023	3046066	Phvul.011G033000.2	-	PF00560,PF08263,PF00069		Leucine-rich repeat protein kinase family protein
Chr11	3054484	3058682	Phvul.011G033100.1	-	PF02018,PF00331		Glycosyl hydrolase family 10 protein
Chr11	3066611	3070180	Phvul.011G033200.1	+	PF05653		Protein of unknown function (DUF803)
Chr11	3072786	3075179	Phvul.011G033300.1	+	PF06273		glycine-rich protein
Chr11	3077321	3082888	Phvul.011G033400.1	-	PF01926,PF11886	ATTOC132,TOC132	multimeric translocon complex in the outer envelope membrane 132
Chr11	3092311	3094705	Phvul.011G033500.1	+	PF01535,PF13041		Pentatricopeptide repeat (PPR-like) superfamily protein
Chr11	3095850	3097700	Phvul.011G033650.1	+	PF00388		PLC-like phosphodiesterases superfamily protein
Chr11	3107297	3107615	Phvul.011G033800.1	+	PF00226		Chaperone DnaJ-domain superfamily protein
Chr11	3115725	3116985	Phvul.011G033900.1	+	PF00098,PF00313	ATCSP4,ATGRP2B,GRP2B	glycine-rich protein 2B
Chr11	3123524	3127903	Phvul.011G034000.1	-	PF01490	LAX2	like AUXIN RESISTANT 2
Chr11	3135058	3137323	Phvul.011G034100.1	+	PF00314		Pathogenesis-related thaumatin superfamily protein
Chr11	3137162	3137391	Phvul.011G034150.1	+
Chr11	3141528	3144133	Phvul.011G034200.1	+	PF00314		Pathogenesis-related thaumatin superfamily protein
Chr11	3148505	3152392	Phvul.011G034300.1	-	PF06813		Major facilitator superfamily protein
Chr11	3163429	3167392	Phvul.011G034400.1	+	PF00160		Cyclophilin-like peptidyl-prolyl cis-trans isomerase family protein
Chr11	3169062	3173685	Phvul.011G034500.1	+	PF04515		Plasma-membrane choline transporter family protein

## Sheet: ss715649341
Chrm	Start	End	transcriptName	Sense	Pfam	arabi-symbol	arabi-defline
Chr04	43296841	43301022	Phvul.004G134300.1	+	PF13676,PF00931		disease resistance protein (TIR-NBS-LRR class), putative
Chr04	43302166	43305874	Phvul.004G134400.1	+	PF01408		Oxidoreductase family protein
Chr04	43347373	43349608	Phvul.004G134500.1	+	PF03140		Plant protein of unknown function (DUF247)
Chr04	43370454	43372198	Phvul.004G134600.1	+	PF03140		Plant protein of unknown function (DUF247)
Chr04	43379118	43379617	Phvul.004G134700.1	+
Chr04	43389955	43391443	Phvul.004G134800.1	-	PF03140		Plant protein of unknown function (DUF247)
Chr04	43393938	43401813	Phvul.004G134901.1	-	PF16113	CHY1	beta-hydroxyisobutyryl-CoA hydrolase 1
Chr04	43410409	43411685	Phvul.004G135000.1	+	PF13561		NAD(P)-binding Rossmann-fold superfamily protein
Chr04	43429333	43436923	Phvul.004G135100.1	-	PF07725,PF13676,PF13855,PF00931		disease resistance protein (TIR-NBS-LRR class), putative
Chr04	43450231	43459046	Phvul.004G135200.4	-	PF00378		ATP-dependent caseinolytic (Clp) protease/crotonase family protein
Chr04	43466910	43468320	Phvul.004G135300.1	+	PF13561		NAD(P)-binding Rossmann-fold superfamily protein
Chr04	43479841	43485813	Phvul.004G135400.1	-	PF00005,PF01061	ABCG11,ATWBC11,COF1,DSO,WBC11	white-brown complex homolog protein 11
Chr04	43520555	43526681	Phvul.004G135500.1	+	PF05623		Protein of unknown function (DUF789)
Chr04	43538721	43546365	Phvul.004G135600.1	+			Putative integral membrane protein conserved region (DUF2404)
Chr04	43547032	43548877	Phvul.004G135700.1	-	PF13041,PF01535		Tetratricopeptide repeat (TPR)-like superfamily protein
Chr04	43550932	43556292	Phvul.004G135800.1	-	PF16499	AGAL2,AtAGAL2	alpha-galactosidase 2
Chr04	43573197	43577995	Phvul.004G135900.1	+	PF00149
Chr04	43578159	43579889	Phvul.004G136000.1	-	PF00230	ALPHA-TIP,TIP3;1	Aquaporin-like superfamily protein
Chr04	43585259	43587554	Phvul.004G136100.1	-	PF08263,PF00069	RKL1	receptor-like kinase 1
Chr04	43590509	43597398	Phvul.004G136200.1	+			hydroxyproline-rich glycoprotein family protein

## Sheet: ss715644121
Chrm	Start	End	transcriptName	Sense	Pfam	arabi-symbol	arabi-defline
Chr01	15822749	15823501	Phvul.001G092000.1	+
Chr01	15934309	15934644	Phvul.001G092100.1	-	PF11820		Protein of unknown function (DUF 3339)
Chr01	15966734	15967471	Phvul.001G092200.1	+	PF11820		Protein of unknown function (DUF 3339)
Chr01	15977232	15977878	Phvul.001G092300.1	-	PF11820
Chr01	15982503	15983192	Phvul.001G092400.1	+	PF11820		Protein of unknown function (DUF 3339)
Chr01	16002308	16002518	Phvul.001G092500.1	-	PF11820		Protein of unknown function (DUF 3339)
Chr01	16151456	16151984	Phvul.001G038100.1	-	PF04043	ATPMEI2,PMEI2	pectin methylesterase inhibitor 2
Chr01	16463978	16469620	Phvul.001G093900.2	-	PF07725,PF00931		disease resistance protein (TIR-NBS-LRR class), putative
Chr01	16531225	16532623	Phvul.001G094000.1	-	PF13041,PF01535		Tetratricopeptide repeat (TPR)-like superfamily protein
Chr01	16651927	16658636	Phvul.001G094100.1	+	PF01435		Peptidase family M48 family protein
Chr01	16825980	16827747	Phvul.001G094200.1	+	PF00067	CYP94B3	cytochrome P450, family 94, subfamily B, polypeptide 3
Chr01	16831120	16833532	Phvul.001G094300.1	-	PF02201	CHC1	SWIB/MDM2 domain superfamily protein
Chr01	17080758	17084849	Phvul.001G092800.1	+	PF06813		Major facilitator superfamily protein
Chr01	17124458	17127397	Phvul.001G092900.1	-	PF00141		Peroxidase superfamily protein
Chr01	17164182	17166741	Phvul.001G093000.1	+			zinc ion binding;nucleic acid binding;zinc ion binding
Chr01	17168012	17168924	Phvul.001G093100.1	+	PF04669		Protein of unknown function (DUF579)
Chr01	17175802	17186279	Phvul.001G093200.1	-
Chr01	17186444	17187699	Phvul.001G093300.1	-	PF00268	ATTSO2,TSO2	Ferritin/ribonucleotide reductase-like family protein
Chr01	17236968	17243043	Phvul.001G093400.1	+
Chr01	17245657	17268843	Phvul.001G093500.2	-	PF01300		DHBP synthase RibB-like alpha/beta domain
Chr01	17338106	17341247	Phvul.001G093700.1	+	PF10539		DCD (Development and Cell Death) domain protein
Chr01	17422194	17425683	Phvul.001G093800.1	+	PF10163
Chr01	17566408	17568080	Phvul.001G094400.1	+	PF01344		Galactose oxidase/kelch repeat superfamily protein
Chr01	17653097	17655368	Phvul.001G094500.1	+	PF01165	GHS1	Ribosomal protein S21 family protein
Chr01	17656313	17659151	Phvul.001G094600.1	-	PF03407
Chr01	17680833	17685898	Phvul.001G094700.1	+	PF00571,PF00654	ATCLC-B,CLC-B	chloride channel B
Chr01	17685811	17700507	Phvul.001G094800.1	-	PF03602		S-adenosyl-L-methionine-dependent methyltransferases superfamily protein
Chr01	17700615	17702260	Phvul.001G094900.1	+
Chr01	17729787	17735025	Phvul.001G095000.1	+	PF04083	MPL1	Myzus persicae-induced lipase 1
Chr01	17741266	17742130	Phvul.001G095100.1	+	PF02298		Cupredoxin superfamily protein
Chr01	17749653	17752496	Phvul.001G095200.2	+	PF12854,PF13041		Tetratricopeptide repeat (TPR)-like superfamily protein
Chr01	17761594	17765323	Phvul.001G095300.1	-
Chr01	17820839	17822321	Phvul.001G095350.1	-
Chr01	17874333	17883685	Phvul.001G095400.1	+	PF00834		Aldolase-type TIM barrel family protein
Chr01	17890597	17892995	Phvul.001G095500.1	+	PF01476,PF07714		Protein kinase superfamily protein
Chr01	17908397	17908820	Phvul.001G095600.1	-	PF13499,PF13833	CML38	calmodulin-like 38
Chr01	17981322	17983826	Phvul.001G095650.1	+	PF00406		P-loop containing nucleoside triphosphate hydrolases superfamily protein
Chr01	18028978	18036236	Phvul.001G095700.3	-	PF10358
Chr01	18072151	18094811	Phvul.001G095800.2	-	PF13450	HEMG2,MEE61,PPO2	Flavin containing amine oxidoreductase family
Chr01	18113934	18144493	Phvul.001G096000.2	-	PF04825	AtRAD21.1,SYN2	Rad21/Rec8-like family protein
Chr01	18209117	18225106	Phvul.001G096100.1	-		TPLATE	ARM repeat superfamily protein
Chr01	18267399	18276392	Phvul.001G096200.1	+	PF12796
Chr01	18304648	18306859	Phvul.001G096300.1	-	PF00724	ATOPR2,OPR2	12-oxophytodienoate reductase 2
Chr01	18369932	18376092	Phvul.001G096400.1	+	PF07039		SGF29 tudor-like domain
Chr01	18381466	18382006	Phvul.001G096500.1	-
Chr01	18383637	18402482	Phvul.001G096600.1	-	PF07714		Protein kinase superfamily protein
Chr01	18441267	18444377	Phvul.001G096700.1	+		TPP	thylakoid processing peptide
Chr01	18472836	18488683	Phvul.001G096800.3	-	PF01535,PF13041		Tetratricopeptide repeat (TPR)-like superfamily protein
Chr01	18489943	18496965	Phvul.001G096900.1	-	PF01150	APY2,ATAPY2	apyrase 2
Chr01	18518192	18522142	Phvul.001G097000.1	-	PF00230	SIP1;1,SIP1A	small and basic intrinsic protein 1A
Chr01	18566025	18568957	Phvul.001G097100.1	+	PF01956		Protein of unknown function DUF106, transmembrane
Chr01	18585106	18586231	Phvul.001G097200.1	-	PF01161	TSF	PEBP (phosphatidylethanolamine-binding protein) family protein
Chr01	18602291	18604694	Phvul.001G097300.1	-	PF01161	FT	PEBP (phosphatidylethanolamine-binding protein) family protein
Chr01	18670253	18671138	Phvul.001G097400.1	-	PF02458		HXXXD-type acyl-transferase family protein
Chr01	18678311	18678896	Phvul.001G097500.1	-	PF02458		HXXXD-type acyl-transferase family protein
Chr01	18690184	18717478	Phvul.001G097600.4	+	PF08389		ARM repeat superfamily protein
Chr01	18746119	18748926	Phvul.001G097700.1	+	PF03463,PF03465,PF03464	ERF1-3	eukaryotic release factor 1-3
Chr01	18757570	18767519	Phvul.001G097800.1	-	PF16177,PF13193,PF00501	ACS	acetyl-CoA synthetase
Chr01	18842806	18844773	Phvul.001G097900.1	-	PF13041		Tetratricopeptide repeat (TPR)-like superfamily protein
Chr01	18875568	18877505	Phvul.001G098000.1	+	PF00400	ATAN11,LWD1	Transducin/WD40 repeat-like superfamily protein
Chr01	18907321	18910421	Phvul.001G098100.1	+	PF00044,PF02800	GAPA,GAPA-1	glyceraldehyde 3-phosphate dehydrogenase A subunit
Chr01	18918810	18920538	Phvul.001G098200.1	-	PF06955,PF00722	EXGT-A4,XTH5	xyloglucan endotransglucosylase/hydrolase 5
Chr01	18931312	18932870	Phvul.001G098300.2	-	PF06955,PF00722	EXGT-A4,XTH5	xyloglucan endotransglucosylase/hydrolase 5
Chr01	19015812	19018119	Phvul.001G098400.1	-	PF02338		Cysteine proteinases superfamily protein
Chr01	19029893	19030496	Phvul.001G098500.1	-	PF05553
Chr01	19078609	19079656	Phvul.001G098600.1	+	PF05553
Chr01	19131374	19132241	Phvul.001G098700.1	-	PF00168		Calcium-dependent lipid-binding (CaLB domain) family protein
Chr01	19156891	19160566	Phvul.001G098801.1	-
Chr01	19185313	19185652	Phvul.001G098900.1	+
Chr01	19219164	19231655	Phvul.001G099000.2	+	PF07522	ATSNM1,SNM1	DNA repair metallo-beta-lactamase family protein
Chr01	19292480	19293770	Phvul.001G099200.1	-	PF04819		Family of unknown function (DUF716)
Chr01	19307176	19309845	Phvul.001G099300.1	-	PF05739,PF14523	ATSYP22,ATVAM3,SGR3,SYP22,VAM3	Syntaxin/t-SNARE family protein
Chr01	19328811	19358325	Phvul.001G099500.2	-	PF02559,PF00270,PF00271		DEAD/DEAH box helicase, putative
Chr01	19372178	19377507	Phvul.001G099600.1	-	PF02705	ATKT4,ATKUP3,KUP3	K+ uptake transporter 3
Chr01	19568489	19569185	Phvul.001G099700.1	-	PF00847	LEP	Integrase-type DNA-binding superfamily protein
Chr01	19833435	19837997	Phvul.001G099800.1	-	PF00293	atnudt12,NUDT12	nudix hydrolase homolog 12
Chr01	19872431	19877867	Phvul.001G099900.1	-	PF01150	APY2,ATAPY2	apyrase 2
Chr01	19883333	19883739	Phvul.001G100000.1	+
Chr01	20014676	20018800	Phvul.001G100100.1	+	PF01150	APY2,ATAPY2	apyrase 2
Chr01	20330785	20332938	Phvul.001G100200.1	+	PF02365	anac047,NAC047	NAC domain containing protein 47
Chr01	20392626	20395512	Phvul.001G100400.1	+	PF14200		hydroxyproline-rich glycoprotein family protein
Chr01	20437455	20440118	Phvul.001G100500.1	+	PF02365	ANAC087	Arabidopsis NAC domain containing protein 87
Chr01	20459495	20461995	Phvul.001G100600.1	+
Chr01	20533891	20540720	Phvul.001G100700.2	+	PF00076		RNA-binding (RRM/RBD/RNP motifs) family protein
Chr01	20556092	20556311	Phvul.001G100800.1	-
Chr01	20620760	20626388	Phvul.001G100900.1	+	PF00076	UBA2A	UBP1-associated protein 2A
Chr01	20663583	20667741	Phvul.001G101000.1	+	PF00170	AREB3,DPBF3	ABA-responsive element binding protein 3
Chr01	20669624	20673640	Phvul.001G101100.5	-	PF00249,PF14379		myb-like HTH transcriptional regulator family protein
Chr01	20674327	20681345	Phvul.001G101200.1	-	PF01926	ATTOC34,OEP34,TOC34	translocon at the outer envelope membrane of chloroplasts 34
Chr01	20681469	20683354	Phvul.001G101300.1	+
Chr01	20707340	20708805	Phvul.001G101400.1	+	PF00656	AtMC9,MC9	metacaspase 9
Chr01	20777799	20781110	Phvul.001G101500.1	+
Chr01	20823503	20824226	Phvul.001G101600.1	-
Chr01	20836539	20838902	Phvul.001G101700.1	+		FRS3	FAR1-related sequence 3
Chr01	20839746	20846068	Phvul.001G101800.1	-
Chr01	20854043	20857155	Phvul.001G101900.1	-	PF03765,PF00650		Sec14p-like phosphatidylinositol transfer family protein
Chr01	20875194	20876194	Phvul.001G102000.1	+
Chr01	20885949	20891176	Phvul.001G102100.1	-			Protein kinase superfamily protein
Chr01	20905580	20911012	Phvul.001G102200.1	+	PF01399	ATCSN2,COP12,CSN2,FUS12	proteasome family protein
Chr01	20911112	20912989	Phvul.001G102300.1	-	PF03959
Chr01	20982929	20986378	Phvul.001G102600.1	+	PF00179	ATUBC22,UBC22	ubiquitin-conjugating enzyme 22

## Sheet: ss715645868
Chrm	Start	End	transcriptName	Sense	Pfam	arabi-symbol	arabi-defline
Chr01	49501101	49507125	Phvul.001G242500.1	+	PF03109	ATATH9,ATH9	ABC2 homolog 9
Chr01	49508872	49512603	Phvul.001G242600.1	-	PF00999	ATCHX15,CHX15	cation/hydrogen exchanger 15
Chr01	49523354	49527672	Phvul.001G242700.1	+	PF00657		SGNH hydrolase-type esterase superfamily protein
Chr01	49529545	49533284	Phvul.001G242800.1	+	PF05916	PSF3,TTN10	GINS complex protein
Chr01	49536311	49537058	Phvul.001G242900.1	+	PF07011	ELF4	Protein of unknown function (DUF1313)
Chr01	49537486	49540675	Phvul.001G243000.1	-	PF00160		Cyclophilin-like peptidyl-prolyl cis-trans isomerase family protein
Chr01	49544086	49548295	Phvul.001G243100.1	+	PF09279,PF00168,PF00387,PF00388		Phosphoinositide-specific phospholipase C family protein
Chr01	49549213	49555780	Phvul.001G243200.1	+	PF09279,PF00168,PF00387,PF00388		Phosphoinositide-specific phospholipase C family protein
Chr01	49557520	49562825	Phvul.001G243300.1	+	PF00168,PF09279,PF00387,PF00388	ATPLC2,PLC2	phospholipase C 2
Chr01	49563532	49570789	Phvul.001G243400.1	+	PF01422	ATNFXL2	sequence-specific DNA binding transcription factors;zinc ion binding;sequence-specific DNA binding transcription factors
Chr01	49571728	49573385	Phvul.001G243500.2	+	PF00069	ATCRR3,CCR3	CRINKLY4 related 3
Chr01	49576339	49578100	Phvul.001G243600.1	-	PF00069	ATCRR3,CCR3	CRINKLY4 related 3
Chr01	49578452	49579688	Phvul.001G243700.1	-	PF00069	ATCRR3,CCR3	CRINKLY4 related 3
Chr01	49582831	49585847	Phvul.001G243800.1	-	PF00069	ATCRR3,CCR3	CRINKLY4 related 3
Chr01	49613453	49618830	Phvul.001G243900.1	+	PF02861,PF07724		Double Clp-N motif-containing P-loop nucleoside triphosphate hydrolases superfamily protein
Chr01	49628275	49631721	Phvul.001G244000.1	-	PF03171,PF14226		2-oxoglutarate (2OG) and Fe(II)-dependent oxygenase superfamily protein
Chr01	49637055	49639871	Phvul.001G244100.2	+	PF00697	PAI1,TRP6	phosphoribosylanthranilate isomerase 1
Chr01	49642086	49644707	Phvul.001G244200.2	+	PF00687		Ribosomal protein L1p/L10e family
Chr01	49646710	49658925	Phvul.001G244300.1	+	PF09268,PF13838,PF01394,PF00637		Clathrin, heavy chain
Chr01	49660143	49662487	Phvul.001G244400.1	+
Chr01	49667175	49669090	Phvul.001G244500.2	+	PF00010		basic helix-loop-helix (bHLH) DNA-binding superfamily protein
Chr01	49678314	49679803	Phvul.001G244600.1	-	PF13639		RING/U-box superfamily protein
Chr01	49688510	49689918	Phvul.001G244700.1	-	PF03195	LBD21	LOB domain-containing protein 21
Chr01	49698852	49700855	Phvul.001G244800.1	+	PF02458		HXXXD-type acyl-transferase family protein
Chr01	49707469	49715399	Phvul.001G244900.2	-		UGP3	UDP-glucose pyrophosphorylase 3
Chr01	49716446	49721102	Phvul.001G245000.1	-	PF01103		Outer membrane OMP85 family protein
Chr01	49722531	49725081	Phvul.001G245100.1	+	PF08311		Mad3/BUB1 homology region 1
Chr01	49725272	49725800	Phvul.001G245200.1	-	PF01190		Pollen Ole e 1 allergen and extensin family protein
Chr01	49728738	49733441	Phvul.001G245300.1	-	PF08263,PF07714	MRH1	Leucine-rich repeat protein kinase family protein
Chr01	49743794	49744502	Phvul.001G245400.1	-	PF00462		Glutaredoxin family protein
Chr01	49747536	49753300	Phvul.001G245500.1	-	PF03141		S-adenosyl-L-methionine-dependent methyltransferases superfamily protein
Chr01	49755716	49758341	Phvul.001G245600.1	-	PF00575,PF07541		Eukaryotic translation initiation factor 2 subunit 1
Chr01	49760083	49762388	Phvul.001G245700.1	-	PF00210	ATFER4,FER4	ferritin 4
Chr01	49772044	49772953	Phvul.001G245800.1	+	PF03195	ASL5,LBD12,PCK1	Lateral organ boundaries (LOB) domain family protein
Chr01	49784103	49791574	Phvul.001G245900.1	-	PF03644		Glycosyl hydrolase family 85
Chr01	49793822	49798937	Phvul.001G246000.1	-	PF04851,PF13959,PF00271		P-loop containing nucleoside triphosphate hydrolases superfamily protein
Chr01	49800524	49807673	Phvul.001G246100.1	+	PF09451
Chr01	49810024	49814381	Phvul.001G246200.1	+	PF14416,PF13839	TBL33	TRICHOME BIREFRINGENCE-LIKE 33
Chr01	49822057	49823372	Phvul.001G246300.1	-	PF10604	PYL6,RCAR9	PYR1-like 6
Chr01	49827143	49832058	Phvul.001G246400.1	-	PF00271,PF00176	CHR42	chromatin remodeling 42
Chr01	49834420	49837364	Phvul.001G246500.1	+	PF00999	ATCHX15,CHX15	cation/hydrogen exchanger 15
Chr01	49839449	49842338	Phvul.001G246600.1	+	PF00999	ATCHX15,CHX15	cation/hydrogen exchanger 15
Chr01	49844860	49848369	Phvul.001G246700.2	-	PF00394,PF07731,PF07732	LAC5	laccase 5
Chr01	49853806	49856701	Phvul.001G246800.2	-	PF00560,PF08263,PF13855,PF07714	IMK2	inflorescence meristem receptor-like kinase 2
Chr01	49863999	49866550	Phvul.001G246900.1	+
Chr01	49867384	49874530	Phvul.001G247000.1	+	PF00364		biotin/lipoyl attachment domain-containing protein
Chr01	49877728	49883033	Phvul.001G247100.1	+	PF04187,PF11891		Protein of unknown function (DUF399 and DUF3411)
Chr01	49883271	49885524	Phvul.001G247200.1	-	PF02153		arogenate dehydrogenase
Chr01	49889153	49892370	Phvul.001G247300.1	-	PF00999	ATCHX15,CHX15	cation/hydrogen exchanger 15
Chr01	49894722	49895275	Phvul.001G247400.1	-	PF00403		Heavy metal transport/detoxification superfamily protein
Chr01	49896966	49898406	Phvul.001G247500.1	-	PF08238
Chr01	49900071	49900691	Phvul.001G247600.1	+	PF02704		Gibberellin-regulated family protein
Chr01	49910016	49911344	Phvul.001G247700.1	-	PF07107	ATWI-12,SAG20,WI12	senescence associated gene 20
Chr01	49921550	49923311	Phvul.001G247800.1	-	PF04749,PF11204		PLAC8 family protein
Chr01	49927386	49931160	Phvul.001G247900.1	-	PF14938	ALPHA-SNAP2,ASNAP	alpha-soluble NSF attachment protein 2
Chr01	49933842	49936818	Phvul.001G248000.1	+	PF03222		Transmembrane amino acid transporter family protein
Chr01	49938205	49940786	Phvul.001G248100.2	-			ARM repeat superfamily protein
Chr01	49942196	49943998	Phvul.001G248200.1	+
Chr01	49947814	49949328	Phvul.001G248300.1	-	PF00651		BTB/POZ domain-containing protein
Chr01	49951091	49952105	Phvul.001G248400.1	-	PF04588		Hypoxia-responsive family protein
Chr01	49957059	49958001	Phvul.001G248500.1	+
Chr01	49966960	49971238	Phvul.001G248600.1	+	PF00854		Major facilitator superfamily protein
Chr01	49972231	49974793	Phvul.001G248700.1	-	PF14531,PF03822	CIPK10,PKS2,SIP1,SNRK3.8	SOS3-interacting protein 1
Chr01	49979822	49983351	Phvul.001G248800.1	-	PF01208	HEME2	Uroporphyrinogen decarboxylase
Chr01	49984475	49990261	Phvul.001G248900.1	-	PF13419		Haloacid dehalogenase-like hydrolase (HAD) superfamily protein
Chr01	49991864	49995027	Phvul.001G249000.1	-	PF05701		Plant protein of unknown function (DUF827)

## Sheet: ss715646000
Chrm	Start	End	transcriptName	Sense	Pfam	arabi-symbol	arabi-defline
Chr02	46599714	46600503	Phvul.002G297500.1	-	PF05922	SLP3	subtilisin-like serine protease 3
Chr02	46617135	46621995	Phvul.002G297600.1	+	PF09478,PF00759	AtGH9C2,GH9C2	glycosyl hydrolase 9C2
Chr02	46624396	46629452	Phvul.002G297700.1	+			Leucine-rich repeat (LRR) family protein
Chr02	46631948	46638053	Phvul.002G297800.1	-	PF00501	LACS4	AMP-dependent synthetase and ligase family protein
Chr02	46640850	46643773	Phvul.002G297900.1	-	PF00334		Nucleoside diphosphate kinase family protein
Chr02	46645667	46649044	Phvul.002G298000.1	-			Pleckstrin homology (PH) domain-containing protein
Chr02	46652288	46654436	Phvul.002G298100.1	-
Chr02	46659035	46659557	Phvul.002G298200.1	+
Chr02	46663224	46667319	Phvul.002G298300.1	+	PF13947,PF13639		RING/U-box superfamily protein
Chr02	46668091	46674197	Phvul.002G298304.1	+			Pentatricopeptide repeat (PPR) superfamily protein
Chr02	46681353	46685896	Phvul.002G298500.1	+	PF02719	UGE5	UDP-D-glucose/UDP-D-galactose 4-epimerase 5
Chr02	46688043	46688641	Phvul.002G298600.1	-
Chr02	46692309	46699231	Phvul.002G298700.1	+	PF02212,PF00350,PF01031	ADL1,ADL1A,AG68,DL1,DRP1A,RSW9	dynamin-like protein
Chr02	46700589	46702898	Phvul.002G298800.1	+	PF01764		alpha/beta-Hydrolases superfamily protein
Chr02	46705642	46706544	Phvul.002G298900.1	-	PF03168		Glycine-rich protein family
Chr02	46710296	46713402	Phvul.002G299000.1	-	PF00240,PF00454	ATPI4K GAMMA 4,PI4K GAMMA 4,UBDK GAMMA 4	phosphoinositide 4-kinase gamma 4
Chr02	46716360	46721280	Phvul.002G299004.1	+	PF01137,PF05189		RNA cyclase family protein
Chr02	46723112	46726139	Phvul.002G299008.1	+	PF01734	PLA IIA,PLA2A,PLP2	phospholipase A 2A
Chr02	46727451	46730153	Phvul.002G299300.1	-	PF13202	ATSOS3,CBL4,SOS3	Calcium-binding EF-hand family protein
Chr02	46731777	46733742	Phvul.002G299400.1	-	PF13833,PF13202	CBL8	calcineurin B-like protein 8
Chr02	46739966	46743488	Phvul.002G299500.1	+		CENP-C	centromere protein C
Chr02	46772475	46789418	Phvul.002G299600.2	+	PF00097,PF15870,PF00628
Chr02	46791869	46800422	Phvul.002G299700.1	+	PF07728,PF01434		FtsH extracellular protease family
Chr02	46805992	46810075	Phvul.002G299800.1	+	PF13474		Nuclear transport factor 2 (NTF2) family protein
Chr02	46811046	46813316	Phvul.002G299900.1	+
Chr02	46815419	46817578	Phvul.002G300000.1	+	PF08766,PF02229	KELP	transcriptional coactivator p15 (PC4) family protein (KELP)
Chr02	46818512	46819453	Phvul.002G300100.1	-	PF14009
Chr02	46824111	46825443	Phvul.002G300200.1	+	PF00462		Glutaredoxin family protein
Chr02	46828512	46830997	Phvul.002G300300.1	-	PF10539		DCD (Development and Cell Death) domain protein
Chr02	46834772	46838180	Phvul.002G300400.1	+	PF02801,PF00109	KAS I,KAS1	3-ketoacyl-acyl carrier protein synthase I
Chr02	46845361	46847358	Phvul.002G300500.1	-	PF13639		RING/U-box superfamily protein
Chr02	46849867	46851622	Phvul.002G300600.1	-	PF01250		Translation elongation factor EF1B/ribosomal protein S6 family protein
Chr02	46852838	46863793	Phvul.002G300700.1	-	PF10382
Chr02	46865419	46868411	Phvul.002G300800.1	-	PF01619		Methylenetetrahydrofolate reductase family protein
Chr02	46870380	46873966	Phvul.002G300900.1	-	PF03083		Nodulin MtN3 family protein
Chr02	46885540	46888815	Phvul.002G301000.1	-	PF13424		Tetratricopeptide repeat (TPR)-like superfamily protein
Chr02	46894455	46895238	Phvul.002G301100.1	-
Chr02	46899304	46902275	Phvul.002G301200.1	-	PF01373	BAM3,BMY8,CT-BMY	chloroplast beta-amylase
Chr02	46904465	46908765	Phvul.002G301300.1	-	PF03810,PF13513		ARM repeat superfamily protein
Chr02	46915928	46919685	Phvul.002G301304.1	+	PF00012	BIP,BIP2	Heat shock protein 70 (Hsp 70) family protein
Chr02	46921808	46929638	Phvul.002G328900.1	-	PF02540,PF00795		carbon-nitrogen hydrolase family protein
Chr02	46932528	46936276	Phvul.002G328904.1	+	PF00012	BIP,BIP2	Heat shock protein 70 (Hsp 70) family protein
Chr02	46937666	46938378	Phvul.002G328908.1	+
Chr02	46944114	46950263	Phvul.002G301500.1	+	PF01204	ATTRE1,TRE1	trehalase 1
Chr02	46958700	46962061	Phvul.002G301600.1	+	PF00106		NAD(P)-binding Rossmann-fold superfamily protein
Chr02	46966440	46970928	Phvul.002G301700.1	-	PF00400		Transducin/WD40 repeat-like superfamily protein
Chr02	46981704	46985079	Phvul.002G301800.2	+	PF03141		S-adenosyl-L-methionine-dependent methyltransferases superfamily protein
Chr02	46986570	46992802	Phvul.002G301900.1	-	PF07714		Protein kinase superfamily protein
Chr02	47002606	47021844	Phvul.002G302000.1	+	PF14604		SH3 domain-containing protein
Chr02	47029084	47033074	Phvul.002G302100.1	-	PF00067	CYP716A1	cytochrome P450, family 716, subfamily A, polypeptide 1
Chr02	47048488	47056619	Phvul.002G302200.1	+	PF00432	CAS1	cycloartenol synthase 1
Chr02	47058095	47063429	Phvul.002G302300.1	+	PF07714		Protein kinase superfamily protein
Chr02	47064255	47070685	Phvul.002G302400.3	-	PF16550,PF04683	RPN13	regulatory particle non-ATPase 13
Chr02	47072788	47079620	Phvul.002G302500.2	+	PF01416		Pseudouridine synthase family protein
Chr02	47080104	47082935	Phvul.002G302600.1	+	PF08263,PF13855,PF00069		Leucine-rich repeat protein kinase family protein
Chr02	47085210	47089516	Phvul.002G302700.1	+	PF00582,PF07714		Protein kinase protein with adenine nucleotide alpha hydrolases-like domain
Chr02	47092530	47093547	Phvul.002G302704.1	+			protein kinase family protein
Chr02	47095824	47105020	Phvul.002G302900.1	-	PF13535,PF02785,PF00289	CAC2	acetyl Co-enzyme a carboxylase biotin carboxylase subunit
Chr02	47106954	47116988	Phvul.002G303000.1	-	PF00271,PF00270,PF08148,PF13234	HEN2	RNA helicase, ATP-dependent, SK12/DOB1 protein
Chr02	47133131	47133758	Phvul.002G303100.1	-	PF08038		Mitochondrial outer membrane translocase complex, subunit Tom7
Chr02	47138019	47148022	Phvul.002G303200.1	+	PF15612,PF15614,PF02791		Homeodomain-like transcriptional regulator
Chr02	47149783	47154270	Phvul.002G303300.1	-	PF00005	ATNAP7,NAP7	non-intrinsic ABC protein 7
Chr02	47158405	47162599	Phvul.002G303400.1	+	PF01467	PECT1	phosphorylethanolamine cytidylyltransferase 1
Chr02	47164414	47166206	Phvul.002G303500.1	-
Chr02	47167604	47179336	Phvul.002G303600.1	-	PF02922,PF00128	ATISA1,ISA1	isoamylase 1
Chr02	47191554	47192579	Phvul.002G303700.1	+	PF02519		SAUR-like auxin-responsive protein family
Chr02	47201572	47212343	Phvul.002G303800.1	+	PF00288,PF08544,PF10509	GalAK	galacturonic acid kinase
Chr02	47215125	47217168	Phvul.002G303900.1	+	PF01663		Alkaline-phosphatase-like family protein
Chr02	47227078	47228150	Phvul.002G304000.1	-	PF00383,PF08211	AT-CDA1,CDA1,DESZ	cytidine deaminase 1
Chr02	47232718	47235624	Phvul.002G304100.1	-	PF00335	TET2	tetraspanin2
Chr02	47237925	47239667	Phvul.002G304200.1	-	PF14226,PF03171	ACO1,ATACO1	ACC oxidase 1
Chr02	47246294	47255001	Phvul.002G304300.1	+	PF00999	ATKEA4,KEA4	K+ efflux antiporter 4
Chr02	47264982	47266443	Phvul.002G304400.1	-	PF00249		myb-like transcription factor family protein
Chr02	47276235	47280875	Phvul.002G304500.1	-	PF07714		Protein kinase protein with adenine nucleotide alpha hydrolases-like domain
Chr02	47286226	47287700	Phvul.002G304600.1	-	PF06888		Pyridoxal phosphate phosphatase-related protein
Chr02	47290819	47294656	Phvul.002G304700.1	+	PF04718		Mitochondrial ATP synthase subunit G protein
Chr02	47299803	47303649	Phvul.002G304800.1	+	PF03096	NDL1	N-MYC downregulated-like 1
Chr02	47306185	47314474	Phvul.002G304900.1	-	PF05195,PF00557		Metallopeptidase M24 family protein
Chr02	47329694	47339935	Phvul.002G304904.1	+	PF00155	ACS7,ATACS7	1-amino-cyclopropane-1-carboxylate synthase 7
Chr02	47339855	47344277	Phvul.002G305100.1	+	PF04718		Mitochondrial ATP synthase subunit G protein
Chr02	47347437	47349371	Phvul.002G305200.1	+	PF13578		S-adenosyl-L-methionine-dependent methyltransferases superfamily protein
Chr02	47349633	47351346	Phvul.002G305300.1	-	PF00410	rps15ae	ribosomal protein S15A E
Chr02	47351464	47354251	Phvul.002G305400.2	+			F-box/RNI-like superfamily protein
Chr02	47356713	47365159	Phvul.002G305500.1	+	PF00675,PF05193		Insulinase (Peptidase family M16) protein
Chr02	47367060	47367920	Phvul.002G305600.1	+	PF01198		Ribosomal protein L31e family protein
Chr02	47371018	47374323	Phvul.002G305700.1	+
Chr02	47374927	47377857	Phvul.002G305800.1	-	PF00458,PF01336,PF00152	EMB2755,SYNC1,SYNC1 ARATH	Class II aminoacyl-tRNA and biotin synthetases superfamily protein
Chr02	47379807	47384369	Phvul.002G305900.1	+	PF03357	SNF7.2,VPS32	SNF7 family protein
Chr02	47386449	47388101	Phvul.002G306000.1	-	PF00249	ATMYB68,MYB68	myb domain protein 68
Chr02	47395506	47397585	Phvul.002G306100.1	-	PF00642		Zinc finger C-x8-C-x5-C-x3-H type family protein
Chr02	47424917	47427434	Phvul.002G306200.1	+	PF05153	MIOX2	myo-inositol oxygenase 2
Chr02	47429465	47431310	Phvul.002G306300.1	+	PF05153	MIOX4	myo-inositol oxygenase 4
Chr02	47440505	47442380	Phvul.002G306400.1	+	PF05153	MIOX4	myo-inositol oxygenase 4
Chr02	47448552	47450565	Phvul.002G306500.1	+	PF05153	MIOX4	myo-inositol oxygenase 4
Chr02	47453129	47464715	Phvul.002G306600.1	+
Chr02	47465822	47467048	Phvul.002G306700.1	-	PF01217		SNARE-like superfamily protein
Chr02	47469775	47473718	Phvul.002G306800.1	-	PF00365	PFK3	phosphofructokinase 3
Chr02	47480697	47486900	Phvul.002G306900.1	+	PF05193,PF00675		Insulinase (Peptidase family M16) protein
Chr02	47492664	47498311	Phvul.002G307000.1	+	PF02365	anac075,NAC075	NAC domain containing protein 75
Chr02	47505786	47508153	Phvul.002G307100.1	-	PF00782		Phosphotyrosine protein phosphatases superfamily protein
Chr02	47518506	47520573	Phvul.002G307200.1	+	PF08263,PF13855		Leucine-rich repeat (LRR) family protein
Chr02	47532327	47535756	Phvul.002G307300.1	-	PF06219		Protein of unknown function (DUF1005)
Chr02	47546099	47549767	Phvul.002G307400.1	+	PF04511	DER1	DERLIN-1
Chr02	47551466	47553256	Phvul.002G307500.1	+	PF00235	PRF5	profilin 5
Chr02	47555924	47557847	Phvul.002G307600.1	+	PF00235	PFN2,PRF2,PRO2	profilin 2
Chr02	47560772	47562747	Phvul.002G307700.1	+	PF00235	PFN2,PRF2,PRO2	profilin 2
Chr02	47565227	47568464	Phvul.002G307800.1	-	PF07983,PF00332		O-Glycosyl hydrolases family 17 protein
Chr02	47574653	47576990	Phvul.002G307900.1	+		ATOXS3,OXS3	oxidative stress 3
Chr02	47584237	47588083	Phvul.002G308000.1	+	PF01095		Pectin lyase-like superfamily protein
Chr02	47590546	47593746	Phvul.002G308100.1	-	PF00612,PF13178	IQD26	IQ-domain 26
Chr02	47592785	47593232	Phvul.002G308200.1	+
Chr02	47599899	47601375	Phvul.002G308300.1	-	PF01554		MATE efflux family protein
Chr02	47615533	47622160	Phvul.002G308400.1	+	PF00349,PF03727	ATHXK1,GIN2,HXK1	hexokinase 1
Chr02	47623493	47624919	Phvul.002G308500.1	-	PF01488,PF14833		6-phosphogluconate dehydrogenase family protein
Chr02	47628014	47630039	Phvul.002G308600.1	+	PF08032,PF00588		tRNA/rRNA methyltransferase (SpoU) family protein
Chr02	47635643	47642069	Phvul.002G308700.1	+	PF13506		Nucleotide-diphospho-sugar transferases superfamily protein
Chr02	47643437	47647738	Phvul.002G308800.1	+	PF01535,PF13812,PF03161	OTP51	endonucleases
Chr02	47648300	47650825	Phvul.002G308900.1	+	PF06911		Senescence/dehydration-associated protein-related
Chr02	47652330	47656558	Phvul.002G309000.1	+	PF04179		initiator tRNA phosphoribosyl transferase family protein
Chr02	47657551	47663673	Phvul.002G309100.1	-	PF00481	ABI1,AtABI1	Protein phosphatase 2C family protein
Chr02	47667120	47667633	Phvul.002G309200.1	+	PF00319	AGL29	AGAMOUS-like 29
Chr02	47669583	47670068	Phvul.002G309300.1	+	PF13639		RING/U-box superfamily protein
Chr02	47674742	47675297	Phvul.002G309400.1	-	PF00319	AGL91	AGAMOUS-like 91
Chr02	47682959	47683535	Phvul.002G309500.1	-	PF00319	AGL91	AGAMOUS-like 91
Chr02	47693435	47698576	Phvul.002G309600.1	-	PF00390,PF03949	ATNADP-ME3,NADP-ME3	NADP-malic enzyme 3
Chr02	47703571	47704899	Phvul.002G309700.1	-	PF05553
Chr02	47715565	47717519	Phvul.002G309800.1	+
Chr02	47720238	47721721	Phvul.002G309900.1	-	PF13041,PF01535		Tetratricopeptide repeat (TPR)-like superfamily protein
Chr02	47722582	47725865	Phvul.002G310000.2	+			Leucine-rich repeat (LRR) family protein
Chr02	47726284	47731209	Phvul.002G310100.1	-	PF05664		Protein of unknown function (DUF810)
Chr02	47750515	47751718	Phvul.002G310200.1	-	PF00847	tny	Integrase-type DNA-binding superfamily protein
Chr02	47759849	47763444	Phvul.002G310300.1	-	PF03016		Exostosin family protein
Chr02	47764027	47767777	Phvul.002G310400.1	+	PF01985	ATCAF1,CAF1	RNA-binding CRS1 / YhbY (CRM) domain-containing protein
Chr02	47768361	47770433	Phvul.002G310500.1	-	PF07690	AtSTP14,STP14	sugar transporter 14
Chr02	47774237	47777599	Phvul.002G310600.1	-	PF07690	AtSTP14,STP14	sugar transporter 14
Chr02	47783994	47787960	Phvul.002G310700.1	+	PF00903		Glyoxalase/Bleomycin resistance protein/Dioxygenase superfamily protein
Chr02	47791328	47791538	Phvul.002G310800.1	-
Chr02	47792678	47797612	Phvul.002G310900.1	-	PF13489		S-adenosyl-L-methionine-dependent methyltransferases superfamily protein
Chr02	47801294	47806738	Phvul.002G311000.1	-	PF00069	ckl3	casein kinase I-like 3
Chr02	47811392	47812769	Phvul.002G311100.1	+	PF10639
Chr02	47812325	47814370	Phvul.002G311200.1	-	PF06955,PF00722	ATXTH26,XTH26	xyloglucan endotransglucosylase/hydrolase 26
Chr02	47815664	47818136	Phvul.002G311300.1	-	PF09118,PF07250		glyoxal oxidase-related protein
Chr02	47820208	47822428	Phvul.002G311400.1	-
Chr02	47835524	47838469	Phvul.002G311500.1	-	PF02309	IAA27,PAP2	phytochrome-associated protein 2
Chr02	47849943	47856401	Phvul.002G311600.2	-	PF07992		Pyridine nucleotide-disulphide oxidoreductase family protein
Chr02	47872580	47876204	Phvul.002G311700.1	+			basic helix-loop-helix (bHLH) DNA-binding superfamily protein
Chr02	47879389	47887732	Phvul.002G311800.1	+	PF00400,PF04564		Transducin/WD40 repeat-like superfamily protein
Chr02	47890203	47893638	Phvul.002G311900.1	+	PF00854		Major facilitator superfamily protein
Chr02	47893827	47896904	Phvul.002G312000.1	+	PF07714	CAK1AT,CDKF;1	CDK-activating kinase 1AT
Chr02	47899727	47903254	Phvul.002G312004.1	+	PF03638		Tesmin/TSO1-like CXC domain-containing protein
Chr02	47909232	47909802	Phvul.002G312008.1	-
Chr02	47914193	47916063	Phvul.002G312012.1	-
Chr02	47922070	47928902	Phvul.002G312100.1	+	PF03638		Tesmin/TSO1-like CXC domain-containing protein
Chr02	47931246	47933307	Phvul.002G312200.1	+
Chr02	47936016	47940145	Phvul.002G312300.1	+	PF13812,PF16953	PRORP1	proteinaceous RNase P 1
Chr02	47943481	47945974	Phvul.002G312400.1	+		ABIL1	ABI-1-like 1
Chr02	47950698	47954399	Phvul.002G312500.1	+
Chr02	47955005	47956158	Phvul.002G312600.1	-	PF01221	ATROPGEF11,PIRF1,ROPGEF11	RHO guanyl-nucleotide exchange factor 11
Chr02	47962575	47963744	Phvul.002G312604.1	+
Chr02	47972801	47973914	Phvul.002G312700.1	-
Chr02	47975732	47978517	Phvul.002G312800.1	-	PF10502	PLSP1	plastidic type i signal peptidase 1
Chr02	47983717	47985481	Phvul.002G312900.1	+	PF07690	ATPLT5,ATPMT5,PMT5	polyol/monosaccharide transporter 5
Chr02	47995106	47996084	Phvul.002G313000.1	+	PF04844	ATOFP8,OFP8	ovate family protein 8
Chr02	48004193	48004937	Phvul.002G313100.2	+
Chr02	48017424	48020207	Phvul.002G313200.1	+	PF13738	YUC2	Flavin-binding monooxygenase family protein
Chr02	48024832	48027356	Phvul.002G313300.1	+	PF00464	AtSHMT3,SHM3	serine hydroxymethyltransferase 3
Chr02	48030034	48034528	Phvul.002G313400.1	+	PF03398		Regulator of Vps4 activity in the MVB pathway protein
Chr02	48034758	48036325	Phvul.002G313500.1	+
Chr02	48039241	48042724	Phvul.002G313600.1	-	PF00025	ARA-7,ARA7,ATRAB-F2B,ATRAB5B,ATRABF2B,RAB-F2B,RABF2B	Ras-related small GTP-binding family protein
Chr02	48048613	48049156	Phvul.002G313700.1	+
Chr02	48053181	48053747	Phvul.002G313800.1	+
Chr02	48056403	48061438	Phvul.002G313900.1	+	PF07899		FRIGIDA-like protein
Chr02	48068580	48074009	Phvul.002G314000.1	+	PF00171	ALDH1A,ALDH2C4,REF1	aldehyde dehydrogenase 2C4
Chr02	48075544	48079334	Phvul.002G314100.1	+	PF00171	ALDH1A,ALDH2C4,REF1	aldehyde dehydrogenase 2C4
Chr02	48089649	48092603	Phvul.002G314200.1	+	PF13855		Leucine-rich repeat (LRR) family protein
Chr02	48103268	48108347	Phvul.002G314300.2	+	PF03348		Serinc-domain containing serine and sphingolipid biosynthesis protein
Chr02	48109047	48116666	Phvul.002G314400.1	-	PF01412	NIG	NSP (nuclear shuttle protein)-interacting GTPase

## Sheet: ss715645817
Chrm	Start	End	transcriptName	Sense	Pfam	arabi-symbol	arabi-defline
Chr02	24037054	24038816	Phvul.002G112000.1	-	PF00320	GATA5	GATA transcription factor 5
Chr02	24049893	24051147	Phvul.002G112100.1	-	PF13855		Leucine-rich repeat (LRR) family protein
Chr02	24055586	24058420	Phvul.002G112200.1	-	PF01486,PF00319	AP3,ATAP3	K-box region and MADS-box transcription factor family protein
Chr02	24106760	24110542	Phvul.002G112300.1	-	PF00179	UBC16	ubiquitin-conjugating enzyme 16
Chr02	24113934	24123379	Phvul.002G112400.1	-	PF02913		FAD-linked oxidases family protein
Chr02	24142074	24153033	Phvul.002G112500.1	+	PF07714		ACT-like protein tyrosine kinase family protein
Chr02	24153630	24156129	Phvul.002G112600.1	-	PF00581	ATSEN1,DIN1,SEN1	Rhodanese/Cell cycle control phosphatase superfamily protein
Chr02	24160189	24164832	Phvul.002G112700.1	+	PF07884		NAD(P)H dehydrogenase (quinone)s
Chr02	24223757	24225641	Phvul.002G112800.1	+	PF13716		SEC14 cytosolic factor family protein / phosphoglyceride transfer family protein
Chr02	24247216	24252423	Phvul.002G112900.1	+	PF01529		DHHC-type zinc finger family protein
Chr02	24255077	24259120	Phvul.002G113000.1	-	PF01490		Transmembrane amino acid transporter family protein
Chr02	24274602	24288395	Phvul.002G113100.2	+	PF09734		Transcription factor IIIC, subunit 5
Chr02	24295194	24296115	Phvul.002G113200.1	-	PF03087		Arabidopsis protein of unknown function (DUF241)
Chr02	24302480	24303353	Phvul.002G113300.1	-	PF03087		Arabidopsis protein of unknown function (DUF241)
Chr02	24304845	24305718	Phvul.002G113400.1	-	PF03087		Arabidopsis protein of unknown function (DUF241)
Chr02	24370428	24371205	Phvul.002G113500.1	+	PF01988		Vacuolar iron transporter (VIT) family protein
Chr02	24392035	24392908	Phvul.002G113600.1	-	PF03087		Arabidopsis protein of unknown function (DUF241)
Chr02	24395500	24396373	Phvul.002G113700.1	-	PF03087		Arabidopsis protein of unknown function (DUF241)
Chr02	24401385	24402455	Phvul.002G113800.1	-	PF03087		Arabidopsis protein of unknown function (DUF241)
Chr02	24405482	24411314	Phvul.002G113900.1	-	PF00385,PF01426,PF00145	CMT1,DMT4	chromomethylase 1
Chr02	24414053	24414950	Phvul.002G114000.1	-	PF03087		Arabidopsis protein of unknown function (DUF241)
Chr02	24422347	24424101	Phvul.002G114100.1	-	PF00182	ATHCHIB,B-CHI,CHI-B,HCHIB,PR-3,PR3	basic chitinase
Chr02	24446859	24447980	Phvul.002G114200.1	-	PF00182	ATHCHIB,B-CHI,CHI-B,HCHIB,PR-3,PR3	basic chitinase
Chr02	24474686	24474893	Phvul.002G114300.1	+	PF00501		AMP-dependent synthetase and ligase family protein
Chr02	24493540	24499071	Phvul.002G114400.1	+	PF13193,PF00501	AAE1	acyl activating enzyme 1
Chr02	24504135	24505511	Phvul.002G114500.1	+	PF03110	SPL5	squamosa promoter binding protein-like 5
Chr02	24537782	24542541	Phvul.002G114600.1	-	PF00180	IDH-I,IDH1	isocitrate dehydrogenase 1
Chr02	24563722	24568224	Phvul.002G114700.1	+	PF00132,PF06426	ATSERAT3;2,SERAT3;2	serine acetyltransferase 3;2
Chr02	24570830	24581695	Phvul.002G114800.1	+	PF01465	ATGRIP,GRIP	Golgi-localized GRIP domain-containing protein
Chr02	24582627	24583463	Phvul.002G114900.1	-	PF13639		RING/U-box superfamily protein
Chr02	24608229	24610000	Phvul.002G115000.1	-	PF00266	PSAT	phosphoserine aminotransferase
Chr02	24626788	24629911	Phvul.002G115100.1	-	PF02984,PF00134	CYCB2;3	Cyclin B2;3
Chr02	24674147	24681627	Phvul.002G115200.1	-	PF12627,PF01743		Polynucleotide adenylyltransferase family protein
Chr02	24687304	24694428	Phvul.002G115300.1	+	PF00627,PF00240	DSK2	ubiquitin family protein
Chr02	24709842	24711585	Phvul.002G115400.1	+
Chr02	24730490	24731457	Phvul.002G115500.1	+			zinc finger (C2H2 type) family protein
Chr02	24736174	24747468	Phvul.002G115600.2	+	PF02383	RHD4	Phosphoinositide phosphatase family protein
Chr02	24770508	24771096	Phvul.002G115700.1	-	PF03018		Disease resistance-responsive (dirigent-like protein) family protein
Chr02	24775121	24777863	Phvul.002G115800.1	-	PF07714		Protein kinase superfamily protein
Chr02	24785117	24788258	Phvul.002G115900.1	-	PF07714		Protein kinase superfamily protein
Chr02	24790145	24795421	Phvul.002G116000.1	-	PF02042		RWP-RK domain-containing protein
Chr02	24801185	24801485	Phvul.002G116100.1	+
Chr02	24837380	24840429	Phvul.002G116200.1	+	PF00069		Protein kinase superfamily protein
Chr02	24852228	24854997	Phvul.002G116300.1	+	PF13812,PF01535,PF13041		Pentatricopeptide repeat (PPR) superfamily protein
Chr02	24857036	24862543	Phvul.002G116400.1	-	PF00996	AthREP,REP	Rab escort protein
Chr02	24882908	24885168	Phvul.002G116500.1	-
Chr02	24906394	24909544	Phvul.002G116550.1	-	PF04420
Chr02	24926872	24928901	Phvul.002G116601.1	+	PF13245		Expressed protein
Chr02	24932108	24938369	Phvul.002G116651.1	-			Transducin/WD40 repeat-like superfamily protein
Chr02	24951542	24957360	Phvul.002G116700.1	+	PF14383,PF14309
Chr02	24959021	24961636	Phvul.002G116800.1	+	PF10181		phosphatidylinositolglycan-related
Chr02	24974744	24984797	Phvul.002G116900.5	-	PF13589,PF01119,PF08676	ATMLH3,MLH3	MUTL protein homolog 3
Chr02	24986847	24989048	Phvul.002G117000.1	+
Chr02	25021329	25025069	Phvul.002G117100.2	-	PF00069		Protein kinase superfamily protein
Chr02	25047443	25049320	Phvul.002G117200.1	-	PF01490		Transmembrane amino acid transporter family protein
Chr02	25053950	25055831	Phvul.002G117300.1	-	PF13812,PF13041		Pentatricopeptide repeat (PPR) superfamily protein
Chr02	25057236	25059415	Phvul.002G117400.1	-	PF00481		Protein phosphatase 2C family protein
Chr02	25062498	25067755	Phvul.002G117500.2	+	PF13458,PF00497,PF00060	ATGLR3.6,GLR3.6	glutamate receptor 3.6
Chr02	25068311	25074965	Phvul.002G117600.1	-	PF07714,PF06479	ATIRE1-2,IRE1-2,IRE1A	Endoribonuclease/protein kinase IRE1-like
Chr02	25086045	25093700	Phvul.002G117700.1	-	PF03547		Auxin efflux carrier family protein
Chr02	25097794	25101546	Phvul.002G117800.1	-
Chr02	25130237	25137391	Phvul.002G117900.1	+	PF03094	ATMLO8,MLO8	Seven transmembrane MLO family protein
Chr02	25166313	25167328	Phvul.002G118000.1	+	PF13639	ATL8	RING/U-box superfamily protein
Chr02	25187706	25192036	Phvul.002G118100.1	-	PF07690,PF00083	TMT3	tonoplast monosaccharide transporter3
Chr02	25196381	25198685	Phvul.002G118200.1	-	PF02225,PF05922,PF00082	ARA12	Subtilase family protein
Chr02	25233038	25236720	Phvul.002G118300.1	+	PF00153	PHT3;3	phosphate transporter 3;3
Chr02	25240759	25244027	Phvul.002G118400.1	-	PF00560,PF13855	PIRL4	plant intracellular ras group-related LRR 4
Chr02	25245881	25247521	Phvul.002G118500.1	-	PF03479		AT hook motif DNA-binding family protein
Chr02	25264275	25266331	Phvul.002G118700.1	+
Chr02	25273822	25287207	Phvul.002G118800.3	-	PF07496,PF13589		Histidine kinase-, DNA gyrase B-, and HSP90-like ATPase family protein
Chr02	25381775	25385993	Phvul.002G118900.1	+	PF00368	HMG1,HMGR1	hydroxy methylglutaryl CoA reductase 1
Chr02	25407490	25413196	Phvul.002G119000.1	-	PF00070	ATNTRA,NTR2,NTRA	NADPH-dependent thioredoxin reductase A
Chr02	25426884	25427451	Phvul.002G119100.1	-
Chr02	25436045	25442308	Phvul.002G119200.1	-	PF00011,PF01388		ARID/BRIGHT DNA-binding domain-containing protein
Chr02	25449175	25453224	Phvul.002G119300.1	+	PF03547		Auxin efflux carrier family protein
Chr02	25453746	25457305	Phvul.002G119401.1	+	PF04434,PF10551,PF03101	FRS5	FAR1-related sequence 5
Chr02	25459094	25466987	Phvul.002G119500.1	-	PF03982		diacylglycerol acyltransferase family
Chr02	25473281	25476077	Phvul.002G119600.1	+	PF11443		Uncharacterised conserved protein UCP015417, vWA
Chr02	25524810	25529340	Phvul.002G119700.1	+	PF02225,PF05922,PF00082		Subtilase family protein
Chr02	25529990	25531263	Phvul.002G119800.1	-
Chr02	25542600	25545814	Phvul.002G119900.1	+	PF00069,PF00139		Concanavalin A-like lectin protein kinase family protein
Chr02	25548271	25550071	Phvul.002G120000.1	-	PF14226,PF03171		2-oxoglutarate (2OG) and Fe(II)-dependent oxygenase superfamily protein
Chr02	25609389	25611271	Phvul.002G120100.1	-	PF14226,PF03171		2-oxoglutarate (2OG) and Fe(II)-dependent oxygenase superfamily protein
Chr02	25612268	25621857	Phvul.002G120200.1	-	PF09379,PF00373,PF00784,PF00225	KCBP,PKCBP,ZWI	kinesin-like calmodulin-binding protein (ZWICHEL)
Chr02	25633920	25638522	Phvul.002G120300.1	+	PF04884	RUS1	Protein of unknown function, DUF647
Chr02	25638846	25641161	Phvul.002G120400.1	+	PF13621		2-oxoglutarate (2OG) and Fe(II)-dependent oxygenase superfamily protein
Chr02	25642445	25643928	Phvul.002G120500.1	+	PF13812,PF01535		Tetratricopeptide repeat (TPR)-like superfamily protein
Chr02	25670211	25672762	Phvul.002G120600.1	+	PF03055	CCD4,NCED4	nine-cis-epoxycarotenoid dioxygenase 4
Chr02	25690218	25694013	Phvul.002G120700.1	-	PF01150		GDA1/CD39 nucleoside phosphatase family protein
Chr02	25713648	25718834	Phvul.002G120800.1	-	PF00892		nodulin MtN21 /EamA-like transporter family protein
Chr02	25720960	25728147	Phvul.002G120901.1	-	PF00892		nodulin MtN21 /EamA-like transporter family protein
Chr02	25732910	25737975	Phvul.002G121000.1	-	PF00892		nodulin MtN21 /EamA-like transporter family protein
Chr02	25807412	25815061	Phvul.002G121100.1	-	PF06419
Chr02	25839224	25842479	Phvul.002G121200.1	+	PF00005,PF01061	ABCG14	ATP-binding cassette 14
Chr02	25854299	25858749	Phvul.002G121300.1	+	PF10197		zinc knuckle (CCHC-type) family protein
Chr02	25859636	25861623	Phvul.002G121400.1	-	PF02201		SWIB/MDM2 domain superfamily protein
Chr02	25865639	25866844	Phvul.002G121500.1	+	PF02201		SWIB/MDM2 domain superfamily protein
Chr02	25878383	25881553	Phvul.002G121600.1	+	PF03048,PF12937		F-box family protein
Chr02	25883922	25885977	Phvul.002G121700.1	+
Chr02	25910895	25916510	Phvul.002G121800.1	+	PF00037,PF04068,PF00005	ATRLI2,RLI2	RNAse l inhibitor protein 2
Chr02	25917972	25920765	Phvul.002G121900.1	-	PF13041,PF01535		Tetratricopeptide repeat (TPR)-like superfamily protein
Chr02	25920997	25930814	Phvul.002G122000.1	-	PF03407	XEG113	xyloglucanase 113
Chr02	25982765	25983308	Phvul.002G122100.1	-	PF00076
Chr02	25992278	25995424	Phvul.002G122200.1	+	PF00067	CYP707A1	cytochrome P450, family 707, subfamily A, polypeptide 1
Chr02	26011892	26024649	Phvul.002G122300.1	-	PF01602		Adaptin family protein
Chr02	26055592	26062197	Phvul.002G122400.1	+	PF09532,PF12701	DCP5	decapping 5
Chr02	26066223	26069149	Phvul.002G122500.1	-	PF06749		Protein of unknown function (DUF1218)
Chr02	26070489	26078266	Phvul.002G122600.1	-	PF05199,PF00732		Long-chain fatty alcohol dehydrogenase family protein
Chr02	26099667	26099928	Phvul.002G122700.1	-
Chr02	26126669	26129429	Phvul.002G122800.1	-	PF03350		Uncharacterised protein family (UPF0114)
Chr02	26130120	26131252	Phvul.002G122900.1	+	PF03168
Chr02	26135308	26137824	Phvul.002G123000.1	+
Chr02	26144968	26145521	Phvul.002G123100.1	+
Chr02	26178052	26181692	Phvul.002G123200.1	+	PF08263,PF00560,PF13855,PF00069		Leucine-rich repeat protein kinase family protein
Chr02	26185418	26193147	Phvul.002G123300.1	-	PF03759	ATROPGEF14,ROPGEF14	RHO guanyl-nucleotide exchange factor 14
Chr02	26199482	26199953	Phvul.002G123400.1	-	PF02458		HXXXD-type acyl-transferase family protein
Chr02	26216072	26219429	Phvul.002G123500.1	-	PF08263,PF13855,PF07714		Leucine-rich repeat protein kinase family protein
Chr02	26242123	26247292	Phvul.002G123600.1	+	PF13893,PF13532		RNA-binding (RRM/RBD/RNP motifs) family protein
Chr02	26247381	26255011	Phvul.002G123700.1	-	PF05687,PF01373	BAM8,BMY2	beta-amylase 2
Chr02	26259879	26264989	Phvul.002G123800.1	-	PF13639		RING/U-box superfamily protein
Chr02	26266963	26273533	Phvul.002G123900.2	-	PF03283		Pectinacetylesterase family protein
Chr02	26291223	26295276	Phvul.002G124000.1	+	PF03372		DNAse I-like superfamily protein
Chr02	26297916	26298630	Phvul.002G124100.1	-
Chr02	26305028	26306899	Phvul.002G124200.1	-	PF07714		Leucine-rich repeat protein kinase family protein
Chr02	26307053	26313927	Phvul.002G124300.1	-	PF00560,PF08263	EFR	EF-TU receptor
Chr02	26354057	26360131	Phvul.002G124500.1	+	PF06813		Major facilitator superfamily protein
Chr02	26360239	26361703	Phvul.002G124600.1	-	PF13439,PF00534		UDP-Glycosyltransferase superfamily protein
Chr02	26362888	26366890	Phvul.002G124700.1	-	PF07714		Protein kinase superfamily protein
Chr02	26383535	26384144	Phvul.002G124800.1	-
Chr02	26389012	26390048	Phvul.002G124900.2	+
Chr02	26390881	26395657	Phvul.002G125000.1	-	PF14604		SH3 domain-containing protein
Chr02	26397535	26406926	Phvul.002G125100.1	-	PF08263,PF00069	FEI1	Leucine-rich repeat protein kinase family protein
Chr02	26419571	26421095	Phvul.002G125200.1	-	PF00067	CYP89A6	cytochrome P450, family 87, subfamily A, polypeptide 6
Chr02	26433705	26437165	Phvul.002G125300.1	+	PF04419,PF12874
Chr02	26438279	26438507	Phvul.002G125400.1	-			Defensin-like (DEFL) family protein
Chr02	26542590	26542818	Phvul.002G125500.1	-			Defensin-like (DEFL) family protein
Chr02	26576646	26576874	Phvul.002G125600.1	-			Defensin-like (DEFL) family protein
Chr02	26580614	26580842	Phvul.002G125700.1	-
Chr02	26610280	26610786	Phvul.002G125801.1	-			Defensin-like (DEFL) family protein
Chr02	26654300	26654821	Phvul.002G125900.1	-
Chr02	26724112	26724667	Phvul.002G126000.1	-	PF00067	CYP93D1	cytochrome P450, family 93, subfamily D, polypeptide 1
Chr02	26726179	26728487	Phvul.002G126100.1	-	PF00067	CYP93D1	cytochrome P450, family 93, subfamily D, polypeptide 1
Chr02	26728926	26731322	Phvul.002G126200.2	-	PF00067	CYP93D1	cytochrome P450, family 93, subfamily D, polypeptide 1
Chr02	26738203	26738911	Phvul.002G126300.1	-			F-box and associated interaction domains-containing protein
Chr02	26790123	26792477	Phvul.002G126400.1	-	PF13837		Homeodomain-like superfamily protein
Chr02	26795642	26796056	Phvul.002G126450.1	+		CPuORF16	conserved peptide upstream open reading frame 16
Chr02	26796056	26799061	Phvul.002G126500.1	+	PF12796		Ankyrin repeat family protein
Chr02	26820121	26823012	Phvul.002G126600.1	-	PF00560,PF07714		Leucine-rich repeat protein kinase family protein
Chr02	26840400	26841579	Phvul.002G126700.1	-		KUF1	KAR-UP F-box 1
Chr02	26863362	26873918	Phvul.002G126800.1	-	PF09382,PF00570,PF16124,PF00271,PF00270	ATRECQ2,MED34,RECQL2	RECQ helicase L2
Chr02	26876086	26891264	Phvul.002G126900.1	+	PF08731,PF13802,PF10551,PF01055	HGL1	heteroglycan glucosidase 1
Chr02	26908781	26923199	Phvul.002G127000.1	+	PF13802,PF01055	HGL1	heteroglycan glucosidase 1
Chr02	26923932	26927769	Phvul.002G127100.1	-	PF01786	AOX1A,ATAOX1A	alternative oxidase 1A
Chr02	26934398	26937859	Phvul.002G127200.1	+	PF00474	ATDUR3,DUR3	solute:sodium symporters;urea transmembrane transporters
Chr02	26939170	26950337	Phvul.002G127300.1	-	PF10409,PF02181	AFH14	Formin Homology 14
Chr02	26951847	26977100	Phvul.002G127400.1	-	PF00240,PF09247,PF00439,PF12157	GTD1,HAC13,HAF01,HAF1,TAF1	HAC13 protein (HAC13)
Chr02	26978105	26980812	Phvul.002G127500.1	+		MED32
Chr02	26985744	26990933	Phvul.002G127600.1	+			Ribonuclease P protein subunit P38-related
Chr02	27000971	27002951	Phvul.002G127700.1	-	PF00887	ACBP,ACBP6	acyl-CoA-binding protein 6
Chr02	27016169	27019302	Phvul.002G127800.1	+	PF08263,PF13855,PF00069		Leucine-rich repeat protein kinase family protein
Chr02	27022002	27024260	Phvul.002G127900.1	-	PF01294	ATBBC1,BBC1,RSU2	breast basic conserved 1
Chr02	27041411	27044034	Phvul.002G128000.3	-	PF00324		Amino acid permease family protein
Chr02	27054959	27056222	Phvul.002G128100.1	+
Chr02	27059987	27060749	Phvul.002G128200.1	-	PF08241		S-adenosyl-L-methionine-dependent methyltransferases superfamily protein
Chr02	27066608	27068675	Phvul.002G128300.1	+	PF12796		Ankyrin repeat family protein
Chr02	27070750	27076988	Phvul.002G128400.1	-		NPG1	tetratricopeptide repeat (TPR)-containing protein
Chr02	27082243	27085187	Phvul.002G128500.1	+	PF00574	CLPP4,NCLPP4	CLP protease P4
Chr02	27096321	27101815	Phvul.002G128600.1	+
Chr02	27104698	27109270	Phvul.002G128700.2	-
Chr02	27120406	27124350	Phvul.002G128800.1	+	PF00098,PF01336,PF16900,PF04057,PF08646	ATRPA70C,RPA70C	Replication factor-A protein 1-related
Chr02	27127331	27129849	Phvul.002G128900.1	+
Chr02	27131977	27133727	Phvul.002G129000.1	+	PF05915		Eukaryotic protein of unknown function (DUF872)
Chr02	27161324	27165872	Phvul.002G129100.1	+	PF03141		S-adenosyl-L-methionine-dependent methyltransferases superfamily protein
Chr02	27169059	27172869	Phvul.002G129200.1	-	PF00931		NB-ARC domain-containing disease resistance protein
Chr02	27229274	27232355	Phvul.002G129400.1	+	PF08241	ERD3	S-adenosyl-L-methionine-dependent methyltransferases superfamily protein
Chr02	27235063	27238243	Phvul.002G129500.1	-	PF00931		NB-ARC domain-containing disease resistance protein
Chr02	27257426	27258875	Phvul.002G129566.1	-			LRR and NB-ARC domains-containing disease resistance protein
Chr02	27259040	27260780	Phvul.002G129632.1	-	PF13401		NB-ARC domain-containing disease resistance protein
Chr02	27268819	27272399	Phvul.002G129700.1	-	PF00931		LRR and NB-ARC domains-containing disease resistance protein
Chr02	27290919	27291258	Phvul.002G129800.1	-			NB-ARC domain-containing disease resistance protein
Chr02	27295731	27299541	Phvul.002G129900.1	-	PF00931		NB-ARC domain-containing disease resistance protein
Chr02	27306625	27310531	Phvul.002G130000.1	-			NB-ARC domain-containing disease resistance protein
Chr02	27318167	27321670	Phvul.002G130100.1	-	PF00931		NB-ARC domain-containing disease resistance protein
Chr02	27328898	27329304	Phvul.002G130200.1	+	PF03141		S-adenosyl-L-methionine-dependent methyltransferases superfamily protein
Chr02	27338023	27340744	Phvul.002G130300.1	-	PF00931		NB-ARC domain-containing disease resistance protein
Chr02	27367581	27370366	Phvul.002G130400.1	-	PF00931		NB-ARC domain-containing disease resistance protein
Chr02	27398102	27401760	Phvul.002G130500.1	-	PF13401		NB-ARC domain-containing disease resistance protein
Chr02	27418263	27425398	Phvul.002G130600.1	-	PF00931		NB-ARC domain-containing disease resistance protein
Chr02	27445768	27447599	Phvul.002G130666.1	-			LRR and NB-ARC domains-containing disease resistance protein
Chr02	27447673	27449203	Phvul.002G130732.1	-	PF00931		NB-ARC domain-containing disease resistance protein
Chr02	27450544	27452967	Phvul.002G130800.1	-
Chr02	27472490	27473967	Phvul.002G130900.1	+	PF03141		S-adenosyl-L-methionine-dependent methyltransferases superfamily protein
Chr02	27489778	27493234	Phvul.002G131000.1	-	PF00931		LRR and NB-ARC domains-containing disease resistance protein
Chr02	27498550	27502193	Phvul.002G131100.1	-	PF00931		LRR and NB-ARC domains-containing disease resistance protein
Chr02	27529052	27534907	Phvul.002G131200.1	-	PF00931		LRR and NB-ARC domains-containing disease resistance protein
Chr02	27537592	27538631	Phvul.002G131300.2	+
Chr02	27539466	27544515	Phvul.002G131400.1	+	PF00069		Protein kinase superfamily protein
Chr02	27548220	27555364	Phvul.002G131500.1	-	PF13713,PF08381	BRX,NLM9	DZC (Disease resistance/zinc finger/chromosome condensation-like region) domain containing protein
Chr02	27562988	27564345	Phvul.002G131600.1	-	PF11947		Protein of unknown function (DUF3464)
Chr02	27568814	27572636	Phvul.002G131700.1	-	PF08880,PF08879	AtGRF2,GRF2	growth-regulating factor 2
Chr02	27576211	27581641	Phvul.002G131800.1	+	PF03637		Mob1/phocein family protein
Chr02	27582553	27586012	Phvul.002G131900.1	-	PF04819
Chr02	27591849	27609596	Phvul.002G132000.1	+	PF01852,PF07059	EDR2	ENHANCED DISEASE RESISTANCE 2
Chr02	27610394	27612058	Phvul.002G132100.1	-	PF00201		UDP-Glycosyltransferase superfamily protein
Chr02	27612765	27615569	Phvul.002G132200.2	-	PF09353		Domain of unknown function (DUF1995)
Chr02	27616693	27618591	Phvul.002G132300.1	-	PF01370	ATPRR1,PRR1	pinoresinol reductase 1
Chr02	27631691	27634555	Phvul.002G132400.1	+	PF01370	ATPRR1,PRR1	pinoresinol reductase 1
Chr02	27634529	27637330	Phvul.002G132500.1	-	PF00249,PF14379		Homeodomain-like superfamily protein
Chr02	27653275	27656746	Phvul.002G132600.1	+
Chr02	27657988	27662222	Phvul.002G132700.1	+	PF01632		Ribosomal protein L35
Chr02	27666599	27670376	Phvul.002G132800.1	-	PF04172		membrane protein, putative
Chr02	27670659	27675562	Phvul.002G132900.1	-	PF13193,PF00501		AMP-dependent synthetase and ligase family protein
Chr02	27678019	27684786	Phvul.002G133000.1	-	PF14703,PF13967,PF02714		early-responsive to dehydration stress protein (ERD4)
Chr02	27698190	27701446	Phvul.002G133100.1	-	PF00485	PRK	phosphoribulokinase
Chr02	27705798	27713779	Phvul.002G133200.1	-	PF04144		SCAMP family protein
Chr02	27726696	27731114	Phvul.002G133300.1	+	PF00271,PF00270	STRS1	DEA(D/H)-box RNA helicase family protein
Chr02	27738030	27741306	Phvul.002G133400.1	+	PF13855,PF00931	RPM1,RPS3	NB-ARC domain-containing disease resistance protein
Chr02	27742102	27745109	Phvul.002G133500.1	+
Chr02	27748450	27752520	Phvul.002G133600.1	+	PF00931	RPM1,RPS3	NB-ARC domain-containing disease resistance protein
Chr02	27753826	27761153	Phvul.002G133700.1	-		SUV2	protein dimerizations
Chr02	27769449	27772644	Phvul.002G133800.1	+
Chr02	27774781	27775297	Phvul.002G133900.2	-
Chr02	27777544	27783114	Phvul.002G134000.1	+	PF01399		Proteasome component (PCI) domain protein
Chr02	27784961	27787241	Phvul.002G134100.1	+	PF14432,PF01535,PF13041		Tetratricopeptide repeat (TPR)-like superfamily protein
Chr02	27788412	27789589	Phvul.002G134150.1	+		VPS25	E2F/DP family winged-helix DNA-binding domain
Chr02	27800977	27808107	Phvul.002G134200.1	-	PF00503	XLG3	extra-large GTP-binding protein 3
Chr02	27818786	27822999	Phvul.002G134300.1	+	PF05871	VPS25	E2F/DP family winged-helix DNA-binding domain
Chr02	27860969	27864110	Phvul.002G134400.1	-	PF01764		Mono-/di-acylglycerol lipase, N-terminal;Lipase, class 3
Chr02	27884354	27885924	Phvul.002G134500.1	+
Chr02	27904502	27906837	Phvul.002G134600.1	+	PF01764		Mono-/di-acylglycerol lipase, N-terminal;Lipase, class 3
Chr02	27907556	27911090	Phvul.002G134700.1	-	PF01764		Mono-/di-acylglycerol lipase, N-terminal;Lipase, class 3
Chr02	27919537	27923341	Phvul.002G134801.1	+			Mono-/di-acylglycerol lipase, N-terminal;Lipase, class 3
Chr02	27943008	27950368	Phvul.002G134900.1	+	PF01764		Mono-/di-acylglycerol lipase, N-terminal;Lipase, class 3
Chr02	27955875	27967618	Phvul.002G135000.1	-	PF13961,PF12796,PF13962		Ankyrin repeat family protein
Chr02	27962204	27965945	Phvul.002G135100.1	+	PF00931		NB-ARC domain-containing disease resistance protein
Chr02	27981237	27984576	Phvul.002G135200.1	-	PF08711	ATIWS1,IWS1	Transcription elongation factor (TFIIS) family protein
Chr02	27993282	27997671	Phvul.002G135300.1	-	PF05542		Protein of unknown function (DUF760)
Chr02	27998629	28005955	Phvul.002G135400.1	+	PF01883		Protein of unknown function (DUF59)
Chr02	28021861	28025081	Phvul.002G135500.1	+	PF01764		Mono-/di-acylglycerol lipase, N-terminal;Lipase, class 3
Chr02	28035443	28036847	Phvul.002G135650.1	-	PF00931		NB-ARC domain-containing disease resistance protein
Chr02	28041175	28044239	Phvul.002G135800.1	+	PF13962		Ankyrin repeat family protein
Chr02	28074320	28077179	Phvul.002G135900.1	-	PF01764		Mono-/di-acylglycerol lipase, N-terminal;Lipase, class 3
Chr02	28087642	28099957	Phvul.002G136000.1	-	PF00170,PF07777,PF16596	AtbZIP16,bZIP16	basic region/leucine zipper transcription factor 16
Chr02	28102315	28104431	Phvul.002G136100.1	+	PF00226,PF11926		DNAJ heat shock N-terminal domain-containing protein
Chr02	28119481	28122532	Phvul.002G136200.1	+	PF06955,PF00722	XTH30,XTR4	xyloglucan endotransglucosylase/hydrolase 30
Chr02	28133853	28138855	Phvul.002G136300.1	-	PF14570,PF03552	ATCSLD3,CSLD3,KJK	cellulose synthase-like D3
Chr02	28152218	28157207	Phvul.002G136400.3	-	PF12695		alpha/beta-Hydrolases superfamily protein
Chr02	28155671	28156281	Phvul.002G136500.1	+
Chr02	28182583	28192135	Phvul.002G136600.1	-	PF01553,PF14829	ACT1,ATS1	phospholipid/glycerol acyltransferase family protein
Chr02	28206605	28209852	Phvul.002G136700.1	-	PF02109	ATDAD1	Defender against death (DAD family) protein
Chr02	28210208	28214546	Phvul.002G136800.1	+	PF01370		NAD(P)-binding Rossmann-fold superfamily protein
Chr02	28215573	28218531	Phvul.002G136900.2	-
Chr02	28233266	28239278	Phvul.002G137000.1	+	PF00046,PF01852	HB-7,HDG5	homeobox-7
Chr02	28258403	28264947	Phvul.002G137100.1	+	PF02928,PF02375,PF02373		Transcription factor jumonji (jmj) family protein / zinc finger (C5HC2 type) family protein
Chr02	28266776	28268610	Phvul.002G137200.1	+	PF00076
Chr02	28320228	28325467	Phvul.002G137300.1	+	PF00249	KAN2	Homeodomain-like superfamily protein
Chr02	28342513	28346762	Phvul.002G137400.1	+	PF04969,PF01202	SKL2	shikimate kinase like 2
Chr02	28352062	28358786	Phvul.002G137500.1	-	PF12174	ATP8,CEO,CEO1,RCD1	WWE protein-protein interaction domain protein family
Chr02	28361299	28370334	Phvul.002G137600.1	-	PF12174	ATP8,CEO,CEO1,RCD1	WWE protein-protein interaction domain protein family
Chr02	28367059	28368106	Phvul.002G137700.1	+
Chr02	28374263	28378840	Phvul.002G137800.1	+	PF04755		Plastid-lipid associated protein PAP / fibrillin family protein
Chr02	28379812	28381206	Phvul.002G137900.1	-
Chr02	28382398	28383806	Phvul.002G138000.1	+
Chr02	28388956	28392246	Phvul.002G138100.1	-	PF00076		RNA-binding (RRM/RBD/RNP motifs) family protein
Chr02	28396866	28400362	Phvul.002G138200.1	+	PF05739,PF14523	ATSYP22,ATVAM3,SGR3,SYP22,VAM3	Syntaxin/t-SNARE family protein
Chr02	28405332	28407937	Phvul.002G138300.2	+
Chr02	28410160	28411186	Phvul.002G138400.1	-	PF14531	ATMKK10,MKK10	MAP kinase kinase 10
Chr02	28415428	28419317	Phvul.002G138500.1	-	PF00447	ATHSFA1D,HSFA1D	heat shock transcription factor A1D
Chr02	28423292	28424294	Phvul.002G138550.1	-		NHL8	NDR1/HIN1-like 8
Chr02	28425739	28429530	Phvul.002G138600.1	-	PF01535,PF13041		Pentatricopeptide repeat (PPR) superfamily protein
Chr02	28434418	28440214	Phvul.002G138700.1	-	PF01485,PF05773	NHL8	NDR1/HIN1-like 8
Chr02	28481389	28484984	Phvul.002G139300.1	+	PF08660
Chr02	28509073	28516617	Phvul.002G139400.1	+	PF00005,PF00664	PGP2	P-glycoprotein 2
Chr02	28529273	28531215	Phvul.002G139500.1	+	PF00249	AtMYB9,MYB9	myb domain protein 9
Chr02	28536778	28539040	Phvul.002G139600.1	-	PF00076,PF14111
Chr02	28558475	28559434	Phvul.002G139700.1	-	PF05770		Inositol 1,3,4-trisphosphate 5/6-kinase family protein
Chr02	28567469	28570736	Phvul.002G139800.1	+	PF09335		SNARE associated Golgi protein family
Chr02	28583383	28588417	Phvul.002G139900.1	-	PF00076		RNA-binding (RRM/RBD/RNP motifs) family protein
Chr02	28593921	28595387	Phvul.002G140000.1	-			Tetratricopeptide repeat (TPR)-like superfamily protein
Chr02	28627397	28630222	Phvul.002G140100.1	+	PF01073		NAD(P)-binding Rossmann-fold superfamily protein
Chr02	28635607	28636731	Phvul.002G140200.1	+	PF13639		RING/U-box superfamily protein
Chr02	28641871	28643161	Phvul.002G140300.1	-	PF13639		RING/U-box superfamily protein
Chr02	28646183	28650172	Phvul.002G140400.1	-	PF00076		RNA-binding (RRM/RBD/RNP motifs) family protein
Chr02	28657805	28659452	Phvul.002G140500.1	+	PF00335	TET1,TRN2	Tetraspanin family protein
Chr02	28682468	28685044	Phvul.002G140600.1	-	PF04640		PLATZ transcription factor family protein
Chr02	28742595	28744015	Phvul.002G140700.1	+
Chr02	28770005	28771605	Phvul.002G140800.1	-	PF01241	PSAK	photosystem I subunit K
Chr02	28774519	28775237	Phvul.002G140900.1	+	PF06094		AIG2-like (avirulence induced gene) family protein
Chr02	28776565	28778006	Phvul.002G141000.1	-
Chr02	28785023	28785782	Phvul.002G141100.1	+
Chr02	28788345	28789689	Phvul.002G141200.1	+
Chr02	28792825	28796804	Phvul.002G141300.1	-	PF13423	UBP20	ubiquitin-specific protease 20
Chr02	28802701	28807659	Phvul.002G141400.1	-	PF01412	AGD9	ARF-GAP domain 9
Chr02	28827340	28829620	Phvul.002G141500.1	+	PF00010,PF14215		Basic helix-loop-helix (bHLH) DNA-binding family protein
Chr02	28842698	28843040	Phvul.002G141600.1	+
Chr02	28844087	28847753	Phvul.002G141700.1	-
Chr02	28852206	28854957	Phvul.002G141800.1	+	PF05678	IKU1	VQ motif-containing protein
Chr02	28868929	28869871	Phvul.002G141901.1	-		PYR1,RCAR11	Polyketide cyclase/dehydrase and lipid transport superfamily protein
Chr02	28878706	28880986	Phvul.002G142000.1	-		MSP2	microspore-specific promoter 2
Chr02	28883563	28887255	Phvul.002G142100.1	-	PF00153	BOU	Mitochondrial substrate carrier family protein
Chr02	28926426	28928551	Phvul.002G142200.1	-	PF05859	ATMIS12,MIS12	minichromosome instability 12 (mis12)-like
Chr02	28934793	28937623	Phvul.002G142300.1	+	PF14111
Chr02	28942270	28943037	Phvul.002G142400.1	-
Chr02	28948225	28948615	Phvul.002G138800.1	+	PF03966		Trm112p-like protein
Chr02	28952304	28968410	Phvul.002G138900.2	-	PF03137		Major facilitator superfamily protein
Chr02	28969896	28990496	Phvul.002G139001.1	-	PF08323		UDP-Glycosyltransferase superfamily protein
Chr02	28992276	28997745	Phvul.002G139100.2	-	PF08243		SPT2 chromatin protein

[truncated: 6 more sheets: ss715645580, ss715645578, ss715647412, ss715648542, ss715647398, ss715646348]
